# Supplementary material for: Burnout, well-being and defensive medical practice among obstetricians and gynaecologists in the UK: cross-sectional survey study
Source: PubMed Central journal article supplement — BMJ Open. 2019 Nov 25;9(11):e030968. doi: 10.1136/bmjopen-2019-030968 (PMC6887071; doi:10.1136/bmjopen-2019-030968), 2019-11-25
Supplement: bmjopen-2019-030968.draft_revisions.pdf [file bmjopen-2019-030968.draft_revisions.pdf]

# BMJ Open

BMJ Open is committed to open peer review. As part of this commitment we make the peer review history of every article we publish publicly available.

When an article is published we post the peer reviewers' comments and the authors' responses online. We also post the versions of the paper that were used during peer review. These are the versions that the peer review comments apply to.

The versions of the paper that follow are the versions that were submitted during the peer review process. They are not the versions of record or the final published versions. They should not be cited or distributed as the published version of this manuscript.

BMJ Open is an open access journal and the full, final, typeset and author-corrected version of record of the manuscript is available on our site with no access controls, subscription charges or pay-per-view fees (<http://bmjopen.bmj.com>).

If you have any questions on BMJ Open's open peer review process please email [info.bmjopen@bmj.com](mailto:info.bmjopen@bmj.com)

# BMJ Open

## Burnout, Wellbeing and Defensive Medical Practice amongst Obstetricians and Gynaecologists in the United Kingdom: cross-sectional survey study

|                               |                                                                                                                                                                                                                                                                                                                                                                                                                                                                                                                                                                                                                                                                                                                                                                                                                                                                         |
|-------------------------------|-------------------------------------------------------------------------------------------------------------------------------------------------------------------------------------------------------------------------------------------------------------------------------------------------------------------------------------------------------------------------------------------------------------------------------------------------------------------------------------------------------------------------------------------------------------------------------------------------------------------------------------------------------------------------------------------------------------------------------------------------------------------------------------------------------------------------------------------------------------------------|
| Journal:                      | <i>BMJ Open</i>                                                                                                                                                                                                                                                                                                                                                                                                                                                                                                                                                                                                                                                                                                                                                                                                                                                         |
| Manuscript ID                 | bmjopen-2019-030968                                                                                                                                                                                                                                                                                                                                                                                                                                                                                                                                                                                                                                                                                                                                                                                                                                                     |
| Article Type:                 | Research                                                                                                                                                                                                                                                                                                                                                                                                                                                                                                                                                                                                                                                                                                                                                                                                                                                                |
| Date Submitted by the Author: | 09-Apr-2019                                                                                                                                                                                                                                                                                                                                                                                                                                                                                                                                                                                                                                                                                                                                                                                                                                                             |
| Complete List of Authors:     | Bourne, Tom; Imperial College London, Obstetrics and Gynaecology, Queen Charlotte's and Chelsea Hospital; KU Leuven, Department of Development & Regeneration<br>Shah, Harsha; Imperial College London, Obstetrics and Gynaecology, Queen Charlotte's and Chelsea Hospital<br>Falconieri, Nora; KU Leuven, Department of Development & Regeneration<br>Timmerman, Dirk; KU Leuven, Department of Development & Regeneration<br>Lees, Christoph; Imperial College London, Obstetrics and Gynaecology, Queen Charlotte's and Chelsea Hospital<br>Wright, Alison; Royal Free Hospital<br>Lumsden, Mary Ann; University of Glasgow, Department of Obstetrics and Gynaecology<br>Regan, Lesley; Imperial College Healthcare NHS Trust, Department of Obstetrics and Gynaecology, St Mary's Hospital<br>Van Calster, Ben; KU Leuven, Department of Development & Regeneration |
| Keywords:                     | OBSTETRICS, GYNAECOLOGY, Health policy < HEALTH SERVICES ADMINISTRATION & MANAGEMENT                                                                                                                                                                                                                                                                                                                                                                                                                                                                                                                                                                                                                                                                                                                                                                                    |
|                               |                                                                                                                                                                                                                                                                                                                                                                                                                                                                                                                                                                                                                                                                                                                                                                                                                                                                         |

SCHOLARONE™  
Manuscripts

1  
2  
3 **Burnout, Wellbeing and Defensive Medical Practice amongst Obstetricians and**  
4  
5 **Gynaecologists in the United Kingdom: Cross-sectional survey study**  
6

7 Tom Bourne, Harsha Shah, Nora Falconieri, Dirk Timmerman, Christoph Lees, Alison Wright,

9 Mary-Ann Lumsden, Lesley Regan, Ben Van Calster

11  
12 Department of Obstetrics and Gynaecology, Queen Charlotte's and Chelsea Hospital,  
13 Imperial College, London, W12 0HS, United Kingdom, Tom Bourne  
14 Professor of Practice

16  
17 Department of Obstetrics and Gynaecology, Queen Charlotte's and Chelsea Hospital,  
18 Imperial College, London, W12 0HS, United Kingdom, Harsha Shah  
19 Clinical Research Fellow

21  
22 KU Leuven, Department of Development & Regeneration, Herestraat 49 box 805, 3000  
23 Leuven, Belgium, Nora Falconieri  
24 PhD Student

25  
26 KU Leuven, Department of Development & Regeneration, Herestraat 49 box 805, 3000  
27 Leuven, Belgium, Dirk Timmerman  
28 Professor of Obstetrics and Gynaecology

29  
30 Department of Obstetrics and Gynaecology, Queen Charlotte's and Chelsea Hospital,  
31 Imperial College, London, W12 0HS, United Kingdom, Christoph Lees  
32 Professor of Obstetrics

33  
34 Department of Obstetrics and Gynaecology, Royal Free Hospital, London, NW3 2QG, United  
35 Kingdom, Alison Wright  
36 Consultant Obstetrician and Gynaecologist

37  
38  
39 Department of Obstetrics and Gynaecology, University of Glasgow, G12 8QQ, United  
40 Kingdom, Mary-Ann Lumsden  
41 Professor of Medical Education and Gynaecology

42  
43 Department of Obstetrics and Gynaecology, St Mary's Hospital, Imperial College NHS Trust,  
44 London, W2 1NY, United Kingdom, Lesley Regan  
45 Professor of Obstetrics and Gynaecology

46  
47  
48 KU Leuven, Department of Development & Regeneration, Herestraat 49 box 805, 3000  
49 Leuven, Belgium, Ben Van Calster  
50 Professor of Statistics

51  
52 Correspondence to: Tom Bourne [t.bourne@ic.ac.uk](mailto:t.bourne@ic.ac.uk)

53  
54 **Keywords: Burnout, Defensive Practice, Doctors, Patient safety**

55  
56 **Manuscript word count: 3259**  
57  
58  
59  
60

## Abstract

**Objectives:** To determine the prevalence of burnout in doctors practising obstetrics and gynaecology, and assess the association with defensive medical practice and self-reported wellbeing.

**Design:** Nationwide online cross-sectional survey study; December 2017-March 2018.

**Setting:** Secondary care hospitals in the United Kingdom

**Participants:** 5661 practising Obstetrics and Gynaecology consultants, specialty and associate specialist doctors and trainees registered with the Royal College of Obstetricians and Gynaecologists

**Primary and Secondary Outcome Measures:** Prevalence of burnout using the Maslach Burnout Inventory and defensive medical practice (avoiding cases or procedures, overprescribing, over-referral) using a 12-item questionnaire. The odds ratios of burnout with defensive medical practice and self-reported wellbeing.

**Results:** 3102/5661 doctors (55%) completed the survey. 3073/3102 (99%) met the inclusion criteria (1462 consultants, 1357 trainees and 254 specialty and associate specialist doctors). 1116/3073 (36%) doctors met the burnout criteria, with levels highest amongst trainees (580/1357 [43%]). 258/1116 (23%) doctors with burnout reported increased defensive practice compared to 142/1957 (7%) without (adjusted odds ratio 4.35, 95% CI 3.46 to 5.49). Odds ratios of burnout with wellbeing items varied between 1.38 and 6.37, and were highest for anxiety (3.59, 95% CI 3.07 to 4.21), depression (4.05, 95% CI 3.26 to 5.04), and suicidal thoughts (6.37, 95% CI 3.95 to 10.7). In multivariable logistic regression, being of younger age, white or 'other' ethnicity, and graduating with a medical degree from the UK or Ireland had the strongest associations with burnout.

1  
2  
3 **Conclusions:** High levels of burnout were observed in obstetricians and gynaecologists and  
4  
5 particularly amongst trainees. Burnout was associated with both increased defensive  
6  
7 medical practice and worse doctor wellbeing. These findings have implications for the  
8  
9 wellbeing and retention of doctors as well as the quality of patient care, and may help to  
10  
11 inform the content of future interventions aimed at preventing burnout and improving  
12  
13 patient safety.  
14  
15  
16  
17  
18  
19  
20  
21  
22  
23  
24  
25  
26  
27  
28  
29  
30  
31  
32  
33  
34  
35  
36  
37  
38  
39  
40  
41  
42  
43  
44  
45  
46  
47  
48  
49  
50  
51  
52  
53  
54  
55  
56  
57  
58  
59  
60

For peer review only

### Article Summary - Strengths and limitations of this study

- First nationwide survey in the United Kingdom which examines the prevalence of burnout as well as its relationship to defensive medical practice and self-reported wellbeing
- This study includes a large number of doctors working in obstetrics and gynaecology and has a good response rate
- Use of the Maslach Burnout Inventory, a widely available and validated tool for measuring burnout amongst doctors allows for comparison with other research in this field
- The study is limited by the fact that it is cross-sectional in design which introduces the possibility of selection bias which must be considered when interpreting the findings

## Introduction

Doctor burnout and mental wellbeing is an important concern internationally(1-4) because of the high reported prevalence(5) and serious consequences for both staff and patients.(6) Burnout syndrome, which is a response to prolonged exposure to occupational stress, is characterised by three dimensions: emotional exhaustion, depersonalisation and reduced personal accomplishment.(7) International studies have shown that burnout is nearly twice as common amongst doctors compared with other healthcare workers.(6) A recent survey by the General Medical Council reported that 24% of trainees and 21% of trainers from across the United Kingdom (UK) described 'feeling burnt out' based on self-reported symptoms(8) which highlights the scale of this problem.(5) The consequences of burnout amongst doctors have been investigated primarily in the United States (USA)(9) with only a few large studies conducted in Europe(10-13) and Asia(14, 15) to validate these findings internationally. These include a negative impact on health including higher rates of substance abuse, depression, suicide and a poorer quality of life.(16, 17) Moreover, burnout in doctors has a significant impact on the productivity of healthcare organisations, intentions to leave medical practice, and both the quality and safety of patient care.(18-22) At present, it is unclear if these findings and the proposed interventions can be extrapolated to healthcare in the United Kingdom (UK) due to a paucity of data on doctor burnout in this setting.(23, 24)

Evidence from studies in Europe(25) and the USA(2) suggest that burnout may be experienced by up to half of doctors in obstetrics and gynaecology (O&G),(26, 27) and that the prevalence of burnout in O&G is one of the highest of any specialty. This has been associated with increased job turnover and reduced workforce retention.(28, 29) Furthermore, a key consequence of doctor burnout is the impact on patient care. A recent meta-analysis suggested burnt out doctors are twice as likely to be involved in patient safety

1  
2  
3 incidents and deliver a lower quality of patient care.(30) This is a significant issue in O&G,  
4  
5 which is a specialty associated with high levels of litigation,(31) incurring considerable costs  
6  
7 to healthcare systems; obstetric claim settlements cost the NHS over £500 million  
8  
9 annually.(32) These high litigation rates in O&G are partly attributable to the large number  
10  
11 of safety incidents and complaints(33, 34) and a parallel culture of intolerance when errors  
12  
13 are made. The overall impact of this 'complaints culture' on doctors is substantial.(35) A UK  
14  
15 wide study on the impact of complaints on doctor welfare demonstrated that they are  
16  
17 associated with an increased risk of depression, anxiety and suicidal ideation as well as  
18  
19 increased defensive practice.(36-38) Defensive medical practice (DMP) is defined as a  
20  
21 doctor's deviation from standard practice in response to complaints or criticism(39) which  
22  
23 can potentially harm patients as a result of either over-investigation and treatment or  
24  
25 because clinicians avoid involvement in difficult cases.(31) This has a further detrimental  
26  
27 impact on productivity and the quality of care being delivered. Moreover, defensive medical  
28  
29 practice represents a highly significant strain on healthcare resources and is estimated to  
30  
31 cost \$46 billion annually in the US.(40)  
32  
33  
34  
35  
36  
37  
38

39 Within the UK, pregnancy is the most common reason for hospital admission and there has  
40  
41 been great focus by the government through initiatives such as 'The Maternal and Neonatal  
42  
43 Health Safety Collaborative'(41) to implement strategies which aim to improve maternity  
44  
45 safety and outcomes. A facet of this work involves 'understanding the culture' of the O&G  
46  
47 workforce.(41) However, to our knowledge, there is currently no quantitative data relating  
48  
49 to burnout amongst doctors working in O&G in the UK to inform potential interventions and  
50  
51 healthcare policy.(42) Thus, there is a clear need to identify the prevalence and factors  
52  
53 associated with burnout amongst doctors to bring about NHS workforce sustainability and  
54  
55 understand the impact on quality of patient care.(5) We conducted a nationwide cross-  
56  
57 sectional survey study to assess burnout, defensive medical practice and associated personal  
58  
59  
60



1  
2  
3 and work factors in O&G doctors in the UK. The aims were firstly to ascertain the prevalence  
4  
5 of burnout in the cohort, secondly to determine the levels of DMP and doctor wellbeing and  
6  
7 explore their relationship with burnout. Finally, we aimed to explore the relationships  
8  
9 between age, gender, ethnicity, doctor seniority, and both burnout and DMP.  
10  
11  
12  
13

## 14 **Methods**

15  
16 All consultants, specialty and specialty associate (SAS) doctors and trainees working in  
17  
18 Obstetrics and Gynaecology in the United Kingdom and registered with the Royal College of  
19  
20 Obstetricians and Gynaecologists (RCOG) were invited to participate in this study between  
21  
22 December 2017 and March 2018. Doctors were sent an email containing information  
23  
24 describing the study and a link to an encrypted online questionnaire. We made it clear to the  
25  
26 participants in the invitation email that their participation was voluntary and that responses  
27  
28 would be both anonymous and untraceable. Informed consent was implied upon return of  
29  
30 the survey. Unique surveys were created for each of the grades described and sent as part of  
31  
32 the annual RCOG Workforce and Welfare survey that collects data about doctors' clinical  
33  
34 practice and working patterns. During the survey period, 4 reminders were sent out. All  
35  
36 actively practising doctors were included as well as doctors who were on sick leave,  
37  
38 maternity leave, or suspended from practice. Exclusion criteria included doctors who are  
39  
40 fully retired, on a career break, in between jobs, not working in the UK at the time of the  
41  
42 survey or those who are currently not employed.  
43  
44  
45  
46  
47  
48  
49

## 50 **The Survey**

51  
52 We used a cross-sectional survey design with three participant groups: consultants, SAS  
53  
54 doctors and trainees, with each group completing a slightly different version of the  
55  
56 questionnaire. We estimate that the time taken to complete the questionnaire was 20  
57  
58 minutes.  
59  
60

1  
2  
3  
4  
5  
6  
7  
8  
9  
10  
11  
12  
13  
14  
15  
16  
17  
18  
19  
20  
21  
22  
23  
24  
25  
26  
27  
28  
29  
30  
31  
32  
33  
34  
35  
36  
37  
38  
39  
40  
41  
42  
43  
44  
45  
46  
47  
48  
49  
50  
51  
52  
53  
54  
55  
56  
57  
58  
59  
60

Participants were asked to provide information on demographic variables, including age, gender, ethnicity (Office of National Statistics classification(43)), relationship status and number of children. In addition, they were asked about job and organisational attributes and factors such as training grade or level of specialisation and rota design. These parameters were chosen based on previous studies suggesting that they have an association with burnout.(44)

## **Main Outcomes and Measures**

### **Symptoms of Burnout**

We measured burnout using the Maslach Burnout Inventory Human Services Survey for Medical Personnel(45) (MBI), a validated 22-item tool to identify and characterise burnout. The MBI has three subscales to evaluate the 3 domains of burnout: emotional exhaustion (EE), depersonalisation (DP), and low personal accomplishment (PA). As in previous studies and according to convention,(9, 44, 45) burnout was defined as high EE (scores of 27 or greater; possible score range from 0-54), or high DP (scores of 10 or greater; possible score range from 0-30). The PA score was also measured with low PA defined as scores of 33 or lower (possible score range from 0-48) but this was not used as a criterion for burnout in line with previous published work on the subject.(44)

### **Defensive Medical Practice**

DMP was assessed using a 12-item questionnaire, which has previously been developed and described.(36, 38) Items are measured on a 5-point Likert scale (ranging from never to often). Nine items quantify 'hedging' behaviour, which is when doctors are overcautious, leading to overprescribing or over-investigation. 3 items quantify 'avoidance' behaviour, which includes not taking on complicated patients and avoiding certain procedures or more

1  
2  
3 difficult cases. We confirm this factor structure in eMethods in the Supplement. Consistent  
4  
5 with previous work, we defined elevated hedging behaviour as a score of 13 or more  
6  
7 (possible score range from 0-36), and elevated avoidance behaviour as a score of 5 or more  
8  
9 (possible score range from 0-12).(36) We defined any DMP as having elevated levels of  
10  
11 avoidance and/or hedging.  
12  
13  
14  
15  
16

### 17 **Doctor Wellbeing**

18 Doctors were asked to self-report on a variety of common medical illness including,  
19  
20 cardiovascular problems, gastro-intestinal problems, depression, anxiety, anger and  
21  
22 irritability, suicidal thoughts, sleep problems, relationship problems, headaches, minor colds,  
23  
24 recurring respiratory infections, and alcohol/drug misuse.  
25  
26  
27  
28  
29

### 30 **Statistical Analyses**

31  
32 Spearman correlations between the MBI and DMP subscales and DMP were calculated. In  
33  
34 order to investigate the association between burnout, DMP, and wellbeing, we calculated  
35  
36 odds ratios based on univariable logistic regression with Firth bias correction.  
37  
38

39 Multivariable logistic regression with Firth bias correction was used to investigate the  
40  
41 association between demographic variables and burnout, with results reported as adjusted  
42  
43 odds ratios and visualised with a nomogram. The predictors of burnout in this analysis were  
44  
45 age, gender, ethnicity, grade, parity, current relationship, medical degree (MD) origin (UK or  
46  
47 Ireland vs. other), and work status (full time vs. less than full time). A similar multivariable  
48  
49 analysis was performed with DMP as the dependent variable. For this model, the same  
50  
51 predictors were used, with burnout added as an additional predictor.  
52  
53

54 For the logistic regression analyses, missing values were singly imputed using the method of  
55  
56 fully conditional specification based on the abovementioned list of predictors, the MBI  
57  
58 subscales (as numerical scores), and the DMP subscales (as numerical scores).  
59  
60

1  
2  
3 R version 3.5.0 was used for the statistical analysis.  
4  
5  
6

## 7 **Patient and Public Involvement**

8  
9  
10 This research was designed and conducted without patient and public involvement.  
11  
12

## 13 **Results**

### 14 **Respondent Characteristics**

15  
16 The survey was sent to a total of 5661 doctors. The overall response rate was 54.8%  
17  
18 (3102/5661). We received questionnaires from 1481 consultants (53% of 2786 consultants  
19  
20 contacted), 1364 trainees (57% of 2375 trainees contacted), and 257 SAS doctors (51% of  
21  
22 500 contacted). Of these, 1462 consultants, 1357 trainees, and 254 SAS doctors were  
23  
24 actively practising and included in the analysis. The mean age was 50 years for consultants,  
25  
26 33 years for trainees, and 47 years for SAS doctors (Table 1). A majority of doctors were  
27  
28 female (58% of the consultants, 80% of the trainees, 68% of the SAS doctors). Consultants  
29  
30 (57%) and trainees (64%) were predominantly white, whereas SAS doctors were most often  
31  
32 of Asian ethnicity (42%). Descriptive statistics by demographic variables are presented in  
33  
34 Table 2. Information on missing data is presented in eTable 1 in the Supplement.  
35  
36  
37  
38  
39  
40  
41

42 We were unable to reliably check if our sample for all doctors was representative of the  
43  
44 entire population to whom the study survey was sent with regards to age, gender and  
45  
46 ethnicity as the RCOG do not hold a centralised database of these variables for all doctors  
47  
48 against which to compare our data. However, the RCOG sent a different survey (Training  
49  
50 Evaluation Form (TEF)) to 1956 trainees in January 2018, which was responded to by 1754  
51  
52 trainees (89.7%) (eTable 2 in the Supplement) . When comparing our data to this survey, we  
53  
54 found that our trainee sample was comparable in terms of gender (79.1% females in the TEF  
55  
56 database compared to 79.8% in our cohort). Furthermore our study population had similar  
57  
58  
59  
60

1  
2  
3 numbers of trainees in the 20-29 and 30-39 age ranges (28.3% and 62.3% respectively in the  
4 TEF database compared to 24.8% and 66.1% respectively in our database). Our trainee  
5 cohort consisted of more doctors in the 40-59 age range (9.1% compared to 6.1% in the TEF  
6 database) which may be accounted for by missing data in the TEF database. In terms of  
7 ethnicity, our sample was also comparable for all groups.  
8  
9  
10  
11  
12  
13  
14  
15  
16

### 17 **Burnout**

18 Regarding the MBI, the percentage of participants meeting the criteria for burnout was 36%  
19 overall (1116/3073); 31% for consultants (460/1462), 43% for trainees (580/1364), and 30%  
20 for SAS doctors (76/254) (Table 1). Between 26% and 32% met the criteria for high EE,  
21 between 12% and 29% met the criteria for high DP, and between 26% and 39% met the  
22 criteria for low PA. The EE and DP scales had a Spearman correlation of 0.57, whereas both  
23 subscales correlated negatively with PA (-0.30 and -0.34, respectively) (eTable 3 and eFigure  
24 1 in the Supplement).  
25  
26  
27  
28  
29  
30  
31  
32  
33  
34  
35  
36

### 37 **Defensive Medical Practice**

38 Increased DMP, according to our criteria, was observed in 13% overall (400/3073); 16% of  
39 consultants (231/1462), 11% of trainees (149/1364), and 8% of SAS doctors (20/254).  
40 Between 4% and 9% met our criteria for increased avoidance, and between 4% and 11% met  
41 our criteria for increased hedging. These subscales had a Spearman correlation of 0.41  
42 (eTable 3 and eFigure 1 in the Supplement).  
43  
44  
45  
46  
47  
48  
49  
50  
51

52 Of all participants who met the criteria for burnout, 23% met the criteria for increased DMP  
53 (258/1116) (Table 3). Of participants who did not meet the criteria for burnout, 7% reported  
54 increased DMP (142/1957). The crude odds ratio (OR) was 3.84 (95% CI 3.08 to 4.79). The  
55  
56  
57  
58  
59  
60

relationship was similar for all categories of doctors, and was observed for avoidance as well as hedging behaviour (Table 3 and eTable 4 in the supplement).

### **Doctor Wellbeing**

Doctors with burnout had a higher prevalence of self-reported medical illness (Table 4). Highest odds ratios were observed for suicidal thoughts (6.37, 95% CI 3.95 to 10.7), depression (4.05, 95% CI 3.26 to 5.04), anxiety (3.59, 95% CI 3.07 to 4.21), anger/irritability (3.51, 95% CI 3.00 to 4.10) and sleep problems or insomnia (3.15, 95% CI 2.70 to 3.67). 13.5% (n=416) of all doctors reported depression, but this was 7.4% for doctors without burnout and 24.4% for doctors with burnout. Furthermore, 2.9% (n=90) of all doctors reported suicidal thoughts, 1.0% among doctors without and 6.3% among doctors with burnout. The OR was lowest for cardiovascular problems (1.38, 95% CI 1.07 to 1.78).

### **Risk factors and correlates**

Results of the multivariable models are presented in Table 5 and eFigure 2 in the Supplement. Age, ethnicity, and origin of MD degree were most strongly related to burnout. The older the doctor, the lower the reported level of burnout (adjusted OR per 5 years 0.92, 95% CI 0.87-0.98) and doctors of white and 'other' ethnicity reported higher levels of burnout (41% and 48% respectively) than doctors of other ethnicities (28 to 34%). Doctors with a medical degree from the UK or Ireland also reported higher levels of burnout (42% vs 25%, adjusted OR 1.74, 95% CI 1.41 to 2.16).

Regarding any DMP, burnout was the strongest predictor, followed by age, type of doctor, and ethnicity. The adjusted OR of burnout to predict increased DMP was 4.35 (95% CI 3.46 to 5.49). Consultants, doctors of mixed ethnicity, and to a lesser extent older doctors, reported the highest levels of DMP.

## Discussion

In this large nationwide study, we have shown that just under half of trainees and a third of consultants and SAS doctors working in obstetrics and gynaecology in the UK suffer from burnout using the MBI scoring system. Furthermore, our data suggest that burnout is associated with higher levels of defensive medical practice, and with poorer psychosocial and physical wellbeing.

The prevalence of burnout in this study is in keeping with smaller international studies conducted within obstetrics and gynaecology.(2, 25, 26, 46) A lack of personal accomplishment and emotional exhaustion were the most commonly endorsed subscales, followed by depersonalisation. The particularly high levels of burnout amongst younger doctors, of whom the majority are trainees, may provide insights into a recent RCOG national training and workforce report.(47) In this, nine out of ten O&G trainees reported feeling low in mood, depressed or anxious since starting specialty training(47). In keeping with this finding, and with a number of American studies,(44, 48) our data indicates that burnout is associated with a negative impact on doctor wellbeing and is strongly associated with depression, anxiety and suicidal thoughts. Our study reported a very strong relationship between burnout and suicidal thoughts, which is higher than in previous studies in surgeons in the USA.(49) This may reflect a vulnerability amongst doctors working in O&G compared to other specialties(25, 26) or the differences in healthcare services and culture internationally.

Studies in the USA have indicated an association between burnout and increased workforce turnover(50) which has both financial implications and an impact on healthcare organisation productivity. The RCOG national workforce report(47) has reported that three quarters of

1  
2  
3 trainees have considered leaving O&G practice. In our study, as well as the high prevalence  
4 of burnout, almost a fifth of trainees reported depression and over a third reported anxiety.  
5  
6 These symptoms were markedly more prevalent in the cohort with burnout. Depression has  
7  
8 been shown to be independently associated with an increased self-reported likelihood of  
9  
10 leaving practice amongst surgeons.(51) Clearly, better understanding the relationship  
11  
12 between burnout, wellbeing and staff turnover intentions is of great importance. This  
13  
14 knowledge will inform the content of future individual and organisational interventions  
15  
16 aimed at preventing burnout and improving the wellbeing and retention of doctors,(52) and  
17  
18 are likely to be generalisable across other specialties.  
19  
20  
21  
22  
23  
24

25  
26 Our finding that burnout is associated with increased DMP supports the concern that doctor  
27  
28 burnout impacts the quality of patient care.(30) In 2010, Shanafelt et al. al(16) showed that  
29  
30 burnout is an independent predictor of self-reported perceived major medical errors. Our  
31  
32 study shows that consultants with burnout are three times more likely to report both  
33  
34 avoidance (avoiding cases or procedures) and hedging (overprescribing or over-referral)  
35  
36 which may have significant and serious consequences on patient care. The observation in  
37  
38 our study that age is inversely associated with burnout is also in keeping with other  
39  
40 studies.(53) This may be explained by the fact that doctors who remain within the specialty  
41  
42 are inherently more resilient, and that those more affected by burnout may be accounted  
43  
44 for in the attrition rate from the specialty. A further noteworthy association in our cohort  
45  
46 was that after controlling for other confounding variables, doctors from ethnic minorities  
47  
48 were less likely to experience burnout. Similar findings have been reported in studies of  
49  
50 trainees and medical students in the USA(54-56) and may be explained by differences in  
51  
52 upbringing and life stressors, which may make them more resilient. Consistent with this, we  
53  
54 found that doctors who graduated in the UK or Ireland are almost twice as likely to  
55  
56 experience burnout.  
57  
58  
59  
60



1  
2  
3  
4  
5 Strengths and weaknesses of our study are important to consider in contrast with other  
6  
7 research on the prevalence of burnout in doctors. A strength of the study is that it is a  
8  
9 nationwide survey which includes a large number of doctors and is the first study to our  
10  
11 knowledge that seeks to explore the relationship between burnout (using a validated tool,  
12  
13 the MBI) and defensive medical practice. There were several limitations to the present  
14  
15 study. Firstly, the overall response rate was only 54.8%; although this is a relatively high  
16  
17 response rate for a survey study of this type, it still introduces the possibility of selection  
18  
19 bias, which must be considered when interpreting the findings. We believe however that the  
20  
21 response rate quoted is the minimum rate and is likely to under-report the response rate  
22  
23 from practising clinicians (eDiscussion in the Supplement). Secondly, it is plausible that  
24  
25 individuals most affected by burnout may have avoided engaging with the survey and  
26  
27 conversely those least impacted may not have seen its value which could bias the results.  
28  
29 Lastly, a limitation of a cross-sectional survey study is that it cannot take into account  
30  
31 variability of symptoms over time, which may be influenced by other factors such as time of  
32  
33 the year and other personal factors.  
34  
35  
36  
37  
38  
39  
40

## 41 **Conclusions**

42  
43 Our nationwide study reports high levels of burnout amongst obstetricians and  
44  
45 gynaecologists in the UK, and that burnout is more prevalent in younger doctors who have  
46  
47 trained in the UK. Furthermore, our data suggest that burnout is strongly associated with  
48  
49 anxiety, depression, suicidal thoughts and substance misuse. This highlights the impact of  
50  
51 burnout on the efficiency and sustainability of the O&G medical workforce, which confirms  
52  
53 the need to regularly assess and mitigate burnout in doctors. We have also observed an  
54  
55 association between burnout and defensive medical practice, which has implications for the  
56  
57 quality and safety of patient care being delivered as well as the wellbeing and retention of  
58  
59  
60

1  
2  
3 staff in the NHS. Ultimately, cultivating a greater understanding of doctor burnout and its  
4  
5 implications has strategic importance for the sustainability of the NHS workforce and will  
6  
7 add to the body of evidence required to improve productivity and patient safety outcomes  
8  
9  
10 more broadly across the UK.  
11  
12  
13  
14  
15  
16  
17  
18  
19  
20  
21  
22  
23  
24  
25  
26  
27  
28  
29  
30  
31  
32  
33  
34  
35  
36  
37  
38  
39  
40  
41  
42  
43  
44  
45  
46  
47  
48  
49  
50  
51  
52  
53  
54  
55  
56  
57  
58  
59  
60

For peer review only

## Footnotes

**Author Contributions:** TB conceptualised and designed the study. All authors contributed to the conduct of the study, data collection and management, interpretation of the data; and preparation, review, and approval of the final version of this manuscript submitted for publication. BVC and NF were responsible for the statistical analysis. TB takes responsibility for the integrity of the data and the accuracy of the data analysis and is the guarantor. TB attests that all listed authors meet authorship criteria and that no others meeting the criteria have been omitted.

**Acknowledgements:** Victoria Bytel contributed to conduct of the study and facilitated data collection.

**Funding:** The Royal College of Obstetricians and Gynaecologists supported the costs of using the Maslach Burnout Inventory. The study received no additional funding. The funders had no role in the study design; collection, management, analysis, and interpretation of the data; preparation, writing, review, or approval of the manuscript; and decision to submit the manuscript for publication. All authors had full access to all of the data in the study, can take responsibility for the integrity of the data, and had final responsibility for the decision to submit for publication.

**Competing interests:** All authors have completed the ICMJE uniform disclosure form at [www.icmje.org/coi\\_disclosure.pdf](http://www.icmje.org/coi_disclosure.pdf) and declare: no support from any organisation for the submitted work; no financial relationships with any organisations that might have an interest in the submitted work in the previous three years; no other relationships or activities that could appear to have influenced the submitted work.

1  
2  
3 **Ethical Approval:** The Chair of the RCOG Ethics Committee reviewed the study proposal and  
4 confirmed that ethical approval was not required as participation by doctors was  
5  
6 voluntary. Participants gave implied informed consent on return of the completed study  
7  
8 questionnaire.  
9  
10

11  
12  
13  
14 **Exclusive Licence:** The Corresponding Author has the right to grant on behalf of all authors  
15 and does grant on behalf of all authors, an exclusive licence on a worldwide basis to the BMJ  
16  
17 Publishing Group Ltd to permit this article (if accepted) to be published in BMJ editions and  
18  
19 any other BMJ PGL products and sublicences such use and exploit all subsidiary rights, as set  
20  
21 out in our licence.  
22  
23  
24

25  
26  
27  
28 **Transparency:** The lead author (TB) affirms that the manuscript is an honest, accurate, and  
29  
30 transparent account of the study being reported; that no important aspects of the study  
31  
32 have been omitted; and any discrepancies from the study as planned have been explained.  
33  
34

35  
36  
37 **Data sharing statement:** No additional data is available at present. Any queries to be  
38  
39 submitted to the corresponding author at t.bourne@ic.ac.uk.  
40  
41  
42  
43  
44  
45  
46  
47  
48  
49  
50  
51  
52  
53  
54  
55  
56  
57  
58  
59  
60

## References

1. Arigoni F, Bovier PA, Sappino A-P. Trend of burnout among Swiss doctors. *Swiss Med Wkly*. 2010;140:w13070.
2. Gabbe SG, Melville J, Mandel L, Walker E. Burnout in chairs of obstetrics and gynecology: diagnosis, treatment, and prevention. *Am J Obstet Gynecol*. 2002;186(4):601-12.
3. Wang Z, Xie Z, Dai J, Zhang L, Huang Y, Chen B. Physician burnout and its associated factors: a cross-sectional study in Shanghai. *J Occup Health*. 2014;56(1):73-83.
4. Klein J, Grosse Frie K, Blum K, von dem Knesebeck O. Burnout and perceived quality of care among German clinicians in surgery. *Int J Qual Health Care*. 2010;22(6):525-30.
5. Johnson J, Bu C, Panagioti M. Tackling burnout in UK trainee doctors is vital for a sustainable, safe, high quality NHS. *BMJ*. 2018;362:k3705.
6. Shanafelt TD, Hasan O, Dyrbye LN, Sinsky C, Satele D, Sloan J, et al. Changes in Burnout and Satisfaction With Work-Life Balance in Physicians and the General US Working Population Between 2011 and 2014. *Mayo Clin Proc*. 2015;90(12):1600-13.
7. Maslach C, Schaufeli WB, Leiter MP. Job burnout. *Annu Rev Psychol*. 2001;52:397-422.
8. GMC. General Medical Council. National training surveys 2018: initial findings report. <https://www.gmc-uk.org/about/what-we-do-and-why/data-and-research/national-training-surveys-reports>. 2018.
9. Rotenstein LS, Torre M, Ramos MA, Rosales RC, Guille C, Sen S, et al. Prevalence of Burnout Among Physicians: A Systematic Review. *JAMA*. 2018;320(11):1131-50.
10. Wurm W, Vogel K, Holl A, Ebner C, Bayer D, Morkl S, et al. Depression-Burnout Overlap in Physicians. *PloS one*. 2016;11(3):e0149913.
11. Vandebroek S, Van Gerven E, De Witte H, Vanhaecht K, Godderis L. Burnout in Belgian physicians and nurses. *Occup Med (Lond)*. 2017;67(7):546-54.
12. Pedersen AF, Sorensen JK, Bruun NH, Christensen B, Vedsted P. Risky alcohol use in Danish physicians: Associated with alexithymia and burnout? *Drug Alcohol Depend*. 2016;160:119-26.
13. Pantenburg B, Lupp M, Konig HH, Riedel-Heller SG. Burnout among young physicians and its association with physicians' wishes to leave: results of a survey in Saxony, Germany. *J Occup Med Toxicol*. 2016;11:2.
14. Li H, Zuo M, Gelb AW, Zhang B, Zhao X, Yao D, et al. Chinese Anesthesiologists Have High Burnout and Low Job Satisfaction: A Cross-Sectional Survey. *Anesth Analg*. 2018;126(3):1004-12.
15. Wu H, Liu L, Wang Y, Gao F, Zhao X, Wang L. Factors associated with burnout among Chinese hospital doctors: a cross-sectional study. *BMC Public Health*. 2013;13:786.

16. Shanafelt TD, Balch CM, Bechamps G, Russell T, Dyrbye L, Satele D, et al. Burnout and medical errors among American surgeons. *Ann Surg*. 2010;251(6):995-1000.
17. Shanafelt TD, Gradishar WJ, Kosty M, Satele D, Chew H, Horn L, et al. Burnout and career satisfaction among US oncologists. *J Clin Oncol*. 2014;32(7):678-86.
18. Dewa CS, Loong D, Bonato S, Trojanowski L. The relationship between physician burnout and quality of healthcare in terms of safety and acceptability: a systematic review. *BMJ Open*. 2017;7(6):e015141.
19. Hall LH, Johnson J, Watt I, Tsipa A, O'Connor DB. Healthcare staff wellbeing, burnout, and patient safety: A systematic review. *PLoS One*. 2016;11(7):e0159015.
20. Panagioti M, Panagopoulou E, Bower P, Lewith G, Kontopantelis E, Chew-Graham C, et al. Controlled Interventions to Reduce Burnout in Physicians: A Systematic Review and Meta-analysis. *JAMA Intern Med*. 2017;177(2):195-205.
21. Salyers MP, Bonfils KA, Luther L, Firmin RL, White DA, Adams EL, et al. The Relationship Between Professional Burnout and Quality and Safety in Healthcare: A Meta-Analysis. *J Gen Intern Med*. 2016:1-8.
22. Hall LH, Johnson J, Heyhoe J, Watt I, Anderson K, O'Connor DB. Exploring the impact of primary care physician burnout and wellbeing on patient care: A focus group study [published online ahead of print (Nov 17)]. *J Patient Saf*. 2017.
23. Rimmer A. Employers must tackle high level of burnout among trainees, says GMC. *BMJ*. 2018;362:k3018.
24. Imo UO. Burnout and psychiatric morbidity among doctors in the UK: a systematic literature review of prevalence and associated factors. *BJPsych Bull*. 2017;41(4):197-204.
25. Castelo-Branco C, Figueras F, Eixarch E, Quereda F, Cancelo MJ, Gonzalez S, et al. Stress symptoms and burnout in obstetric and gynaecology residents. *BJOG*. 2007;114(1):94-8.
26. Moradi Y, Baradaran HR, Yazdandoost M, Atrak S, Kashanian M. Prevalence of Burnout in residents of obstetrics and gynecology: A systematic review and meta-analysis. *Med J Islam Repub Iran*. 2015;29(4):235-.
27. Dyrbye LN, Burke SE, Hardeman RR, et al. Association of clinical specialty with symptoms of burnout and career choice regret among us resident physicians. *JAMA*. 2018;320(11):1114-30.
28. Shanafelt T, Goh J, Sinsky C. The Business Case for Investing in Physician Well-being. *JAMA Intern Med*. 2017;177(12):1826-32.
29. Landon BE, Reschovsky JD, Pham HH, Blumenthal D. Leaving medicine: the consequences of physician dissatisfaction. *Med Care*. 2006;44(3):234-42.
30. Panagioti M, Geraghty K, Johnson J, Zhou A, Panagopoulou E, Chew-Graham C, et al. Association Between Physician Burnout and Patient Safety, Professionalism, and Patient Satisfaction: A Systematic Review and Meta-analysis. *JAMA Intern Med*. 2018;178(10):1317-30.

- 1  
2  
3 31. Studdert DM, Mello MM, Sage WM, DesRoches CM, Peugh J, Zapert K, et al.  
4 Defensive medicine among high-risk specialist physicians in a volatile malpractice  
5 environment. *JAMA*. 2005;293(21):2609-17.  
6  
7 32. NHS. NHS Resolution. Annual report and accounts 2017/2018.  
8 <https://resolution.nhs.uk/annual-report-and-accounts/>. 2018.  
9  
10 33. Xu X, Siefert KA, Jacobson PD, Lori JR, Ransom SB. The effects of medical liability on  
11 obstetric care supply in Michigan. *Am J Obstet Gynecol*. 2008;198(2):205.e1-9.  
12  
13 34. Barbieri RL. Professional liability payments in obstetrics and gynecology. *Obstet*  
14 *Gynecol*. 2006;107(3):578-81.  
15  
16 35. Zwecker P, Azoulay L, Abenhaim HA. Effect of fear of litigation on obstetric care: a  
17 nationwide analysis on obstetric practice. *Am J Perinatol*. 2011;28(4):277-84.  
18  
19 36. Bourne T, Wynants L, Peters M, Van Audenhove C, Timmerman D, Van Calster B, et  
20 al. The impact of complaints procedures on the welfare, health and clinical practise of 7926  
21 doctors in the UK: a cross-sectional survey. *BMJ Open*. 2015;5(1):e006687.  
22  
23 37. Bourne T, Vanderhaegen J, Vranken R, Wynants L, De Cock B, Peters M, et al.  
24 Doctors' experiences and their perception of the most stressful aspects of complaints  
25 processes in the UK: an analysis of qualitative survey data. *BMJ Open*. 2016;6(7):e011711.  
26  
27 38. Bourne T, De Cock B, Wynants L, Peters M, Van Audenhove C, Timmerman D, et al.  
28 Doctors' perception of support and the processes involved in complaints investigations and  
29 how these relate to welfare and defensive practice: a cross-sectional survey of the UK  
30 physicians. *BMJ Open*. 2017;7(11):e017856.  
31  
32 39. Ortashi O, Virdee J, Hassan R, Mutrynowski T, Abu-Zidan F. The practice of defensive  
33 medicine among hospital doctors in the United Kingdom. *BMC Med Ethics*. 2013;14:42.  
34  
35 40. Mello MM, Chandra A, Gawande AA, Studdert DM. National costs of the medical  
36 liability system. *Health Aff (Millwood)*. 2010;29(9):1569-77.  
37  
38 41. NHS. The Maternal and Neonatal Health Safety Collaborative.  
39 <https://improvement.nhs.uk/resources/maternal-and-neonatal-safety-collaborative/>. 2017.  
40  
41 42. NHSE. National Maternity Review. Better Births: Improving outcomes of maternity  
42 services in England. 2016 March 2018. Available from: [https://www.england.nhs.uk/mat-](https://www.england.nhs.uk/mat-transformation/implementing-better-births/mat-review/)  
43 [transformation/implementing-better-births/mat-review/](https://www.england.nhs.uk/mat-transformation/implementing-better-births/mat-review/).  
44  
45 43. Statistics OfN. Ethnic group, national identity and religion 2010 [Available from:  
46 [https://www.ons.gov.uk/methodology/classificationsandstandards/measuringequality/ethni](https://www.ons.gov.uk/methodology/classificationsandstandards/measuringequality/ethnicgroupnationalidentityandreligion#ethnic-group)  
47 [cgroupnationalidentityandreligion#ethnic-group](https://www.ons.gov.uk/methodology/classificationsandstandards/measuringequality/ethnicgroupnationalidentityandreligion#ethnic-group).  
48  
49 44. West CP, Dyrbye LN, Shanafelt TD. Physician burnout: contributors, consequences  
50 and solutions. *J Intern Med*. 2018;283(6):516-29.  
51  
52 45. Maslach C, Jackson SE. The measurement of experienced burnout. *J Organ Behav*.  
53 1981;2(2):99-113.  
54  
55  
56  
57  
58  
59  
60

- 1  
2  
3 46. Ye J, Wang H, Wu H, Ye L, Li Q, Ma XY, et al. Burnout among obstetricians and  
4 paediatricians: a cross-sectional study from China. *BMJ Open*. 2019;9(1):e024205.  
5  
6 47. RCOG. O&G Workforce Report London, UK: Royal College of Obstetricians and  
7 Gynaecologists; 2017 [Available from: <https://www.rcog.org.uk/workforce2017>.  
8  
9 48. Tawfik DS, Profit J, Morgenthaler TI, Satele DV, Sinsky CA, Dyrbye LN, et al. Physician  
10 Burnout, Well-being, and Work Unit Safety Grades in Relationship to Reported Medical  
11 Errors. *Mayo Clin Proc*. 2018.  
12  
13 49. Shanafelt TD, Balch CM, Dyrbye L, Bechamps G, Russell T, Satele D, et al. Special  
14 report: suicidal ideation among American surgeons. *Arch Surg*. 2011;146(1):54-62.  
15  
16 50. Dyrbye LN, Shanafelt TD. Physician burnout: a potential threat to successful health  
17 care reform. *JAMA*. 2011;305(19):2009-10.  
18  
19 51. Shanafelt T, Sloan J, Satele D, Balch C. Why do surgeons consider leaving practice? *J*  
20 *Am Coll Surg*. 2011;212(3):421-2.  
21  
22 52. Panagioti M, Geraghty K, Johnson J. How to prevent burnout in cardiologists? A  
23 review of the current evidence, gaps, and future directions. *Trends Cardiovasc Med*.  
24 2018;28(1):1-7.  
25  
26 53. Shanafelt TD, Balch CM, Bechamps GJ, Russell T, Dyrbye L, Satele D, et al. Burnout  
27 and career satisfaction among American surgeons. *Ann Surg*. 2009;250(3):463-71.  
28  
29 54. Dyrbye LN, Thomas MR, Eacker A, Harper W, Massie FS, Jr., Power DV, et al. Race,  
30 ethnicity, and medical student well-being in the United States. *Arch Intern Med*.  
31 2007;167(19):2103-9.  
32  
33 55. Dyrbye L, Shanafelt T. A narrative review on burnout experienced by medical  
34 students and residents. *Med Educ*. 2016;50(1):132-49.  
35  
36 56. West CP, Shanafelt TD, Kolars JC. Quality of life, burnout, educational debt, and  
37 medical knowledge among internal medicine residents. *JAMA*. 2011;306(9):952-60.  
38  
39  
40  
41  
42  
43  
44  
45  
46  
47  
48  
49  
50  
51  
52  
53  
54  
55  
56  
57  
58  
59  
60



1  
2  
3  
4  
5  
6  
7  
8  
9  
10  
11  
12  
13  
14  
15  
16  
17  
18  
19  
20  
21  
22  
23  
24  
25  
26  
27  
28  
29  
30  
31  
32  
33  
34  
35  
36  
37  
38  
39  
40  
41  
42  
43  
44  
45  
46  
47  
48  
49  
50  
51  
52  
53  
54  
55  
56  
57  
58  
59  
60

For peer review only

## Tables

Table 1. Descriptive statistics by doctor category.

|                                                   | <b>Consultants<br/>N=1481</b> | <b>SAS<sup>a</sup><br/>N=257</b> | <b>Trainees<br/>N=1364</b> |
|---------------------------------------------------|-------------------------------|----------------------------------|----------------------------|
| Actively practising                               | 1462 (99%)                    | 254 (99%)                        | 1357 (99%)                 |
| <i>If actively practising<sup>b</sup>:</i>        |                               |                                  |                            |
| Age, mean (range)                                 | 50 (33-73)                    | 47 (27-74)                       | 33 (25-58)                 |
| Female                                            | 831 (58%)                     | 171 (68%)                        | 1067 (80%)                 |
| Ethnicity                                         |                               |                                  |                            |
| White                                             | 831 (57%)                     | 79 (31%)                         | 857 (64%)                  |
| Asian                                             | 438 (30%)                     | 106 (42%)                        | 288 (21%)                  |
| Black                                             | 88 (6%)                       | 23 (9%)                          | 90 (7%)                    |
| Mixed                                             | 58 (4%)                       | 26 (10%)                         | 88 (7%)                    |
| Other                                             | 37 (3%)                       | 19 (8%)                          | 26 (2%)                    |
| Parity                                            | 1267 (87%)                    | 198 (78%)                        | 585 (43%)                  |
| Relationship                                      | 1269 (87%)                    | 216 (85%)                        | 979 (72%)                  |
| Qualified in UK/Ireland                           | 865 (59%)                     | 42 (17%)                         | 1089 (80%)                 |
| Full time                                         | 1276 (87%)                    | 211 (83%)                        | 1064 (79%)                 |
| Subspecialty (consultants)                        |                               |                                  |                            |
| None                                              | 1278 (87%)                    | N/A                              | N/A                        |
| Maternal/Fetal medicine                           | 56 (4%)                       | N/A                              | N/A                        |
| Sexual/reproductive health                        | 34 (2%)                       | N/A                              | N/A                        |
| Gynaecological oncology                           | 33 (2%)                       | N/A                              | N/A                        |
| Reproductive medicine                             | 33 (2%)                       | N/A                              | N/A                        |
| Urogynaecology                                    | 28 (2%)                       | N/A                              | N/A                        |
| <b>Maslach Burnout Inventory</b>                  |                               |                                  |                            |
| <b>Emotional exhaustion</b>                       |                               |                                  |                            |
| Mean                                              | 2.2 (0-6)                     | 2.1 (0-5.9)                      | 2.4 (0-6)                  |
| High <sup>c</sup> (%)                             | 411 (28%)                     | 65 (26%)                         | 440 (32%)                  |
| <b>Depersonalisation</b>                          |                               |                                  |                            |
| Mean                                              | 0.9 (0-5.8)                   | 0.9 (0-6)                        | 1.4 (0-5.8)                |
| High <sup>d</sup> (%)                             | 178 (12%)                     | 33 (13%)                         | 394 (29%)                  |
| <b>Personal accomplishment</b>                    |                               |                                  |                            |
| Mean                                              | 4.7 (1-6)                     | 4.4 (0.5-6)                      | 4.3 (0-6)                  |
| Low <sup>e</sup> (%)                              | 382 (26%)                     | 95 (37%)                         | 530 (39%)                  |
| <b>Burnout<sup>f</sup></b>                        | 460 (31%)                     | 76 (30%)                         | 580 (43%)                  |
| <b>Defensive medical practice</b>                 |                               |                                  |                            |
| <b>Avoidance</b>                                  |                               |                                  |                            |
| Mean                                              | 1.4 (0-12)                    | 1.1 (0-12)                       | 0.9 (0-10)                 |
| Elevated <sup>g</sup> (%)                         | 125 (9%)                      | 13 (5%)                          | 58 (4%)                    |
| <b>Hedging</b>                                    |                               |                                  |                            |
| Mean                                              | 5.2 (0-36)                    | 2.8 (0-36)                       | 4.6 (0-36)                 |
| Elevated <sup>h</sup> (%)                         | 164 (11%)                     | 11 (4%)                          | 114 (8%)                   |
| <b>Any defensive medical practice<sup>i</sup></b> | 231 (16%)                     | 20 (8%)                          | 149 (11%)                  |

<sup>a</sup> SAS: Specialty and Specialty Associate Doctors

1  
2  
3 <sup>b</sup> Results for each variable are based on available data, i.e. excluding participants with a  
4 missing value. Gender has the most missing values, 41/3073 (1.3%). Missing values for all  
5 variables are reported in eTable1 in the Supplement.

6 <sup>c</sup> Scores of  $\geq 27$  (range 0-54) are considered high and indicate burnout in accordance with the  
7 Maslach Burnout Inventory

8 <sup>d</sup> Scores of  $\geq 10$  (range 0-30) are considered high and indicate burnout in accordance with the  
9 Maslach Burnout Inventory

10 <sup>e</sup> The score range is 0-48; scores  $\leq 33$  are defined as low personal accomplishment

11 <sup>f</sup> Positive for burnout if emotional exhaustion or depersonalisation scores high (as defined) in  
12 accordance with the Maslach Burnout Inventory

13 <sup>g</sup> Scores of  $\geq 13$  (range 0-36) are considered elevated and indicate avoidance behaviour

14 <sup>h</sup> Scores of  $\geq 5$  (range 0-12) are considered elevated and indicate hedging behaviour

15 <sup>i</sup> Defined as elevated levels of avoidance and/or hedging behaviour  
16  
17  
18  
19  
20  
21  
22  
23  
24  
25  
26  
27  
28  
29  
30  
31  
32  
33  
34  
35  
36  
37  
38  
39  
40  
41  
42  
43  
44  
45  
46  
47  
48  
49  
50  
51  
52  
53  
54  
55  
56  
57  
58  
59  
60

For peer review only

Table 2. Descriptive statistics of Burnout and Defensive Medical Practice stratified by demographic variables.

|                                   | Burnout <sup>a</sup> (%) | Avoidance <sup>b</sup> (%) | Hedging <sup>c</sup> (%) | Any DMP <sup>d,e</sup> (%) |
|-----------------------------------|--------------------------|----------------------------|--------------------------|----------------------------|
| <b>Age (years)</b>                |                          |                            |                          |                            |
| <35 (n=948)                       | 440 (46%)                | 37 (4%)                    | 93 (10%)                 | 115 (12%)                  |
| 35-49 (n=1209)                    | 395 (33%)                | 68 (6%)                    | 114 (9%)                 | 151 (12%)                  |
| ≥50 (n=916)                       | 281 (31%)                | 91 (10%)                   | 82 (9%)                  | 134 (15%)                  |
| <b>Gender</b>                     |                          |                            |                          |                            |
| Female (n=2069)                   | 763(37%)                 | 105 (5%)                   | 179 (9%)                 | 239 (12%)                  |
| Male (n=963)                      | 332 (34%)                | 87 (9%)                    | 102 (11%)                | 152 (16%)                  |
| <b>Ethnicity</b>                  |                          |                            |                          |                            |
| White (n=1767)                    | 723 (41%)                | 114 (6%)                   | 159 (9%)                 | 227 (13%)                  |
| Asian (n=832)                     | 229 (28%)                | 49 (6%)                    | 79 (9%)                  | 105 (13%)                  |
| Black (n=201)                     | 57 (28%)                 | 10 (5%)                    | 17 (8%)                  | 21 (10%)                   |
| Mixed (n=172)                     | 59 (34%)                 | 14 (8%)                    | 23 (13%)                 | 31 (18%)                   |
| Other (n=82)                      | 39 (48%)                 | 3 (4%)                     | 7 (9%)                   | 8 (10%)                    |
| <b>Parity</b>                     |                          |                            |                          |                            |
| No (n=1023)                       | 473 (46%)                | 48 (5%)                    | 96 (9%)                  | 126 (12%)                  |
| Yes (n=2050)                      | 643 (31%)                | 148 (7%)                   | 193 (9%)                 | 274 (13%)                  |
| <b>Relationship</b>               |                          |                            |                          |                            |
| No (n=601)                        | 266 (44%)                | 32 (5%)                    | 51 (8%)                  | 74 (12%)                   |
| Yes (n=2464)                      | 844 (34%)                | 161 (7%)                   | 237 (10%)                | 323 (13%)                  |
| <b>Country of Qualification</b>   |                          |                            |                          |                            |
| United Kingdom/Ireland (n=1996)   | 841 (42%)                | 125 (6%)                   | 193 (10%)                | 265 (13%)                  |
| Other (n=1075)                    | 273 (25%)                | 71 (7%)                    | 96 (9%)                  | 135 (13%)                  |
| <b>Work status</b>                |                          |                            |                          |                            |
| Full Time (n= 2551)               | 952 (37%)                | 161 (6%)                   | 248 (10%)                | 341 (13%)                  |
| Less Than Full Time (n=519)       | 163 (31%)                | 35 (7%)                    | 41 (8%)                  | 59 (11%)                   |
| <b>Subspecialty (consultants)</b> |                          |                            |                          |                            |
| None (n=1278)                     | 404 (32%)                | 116 (9 %)                  | 151 (12%)                | 213 (17%)                  |
| Maternal/Fetal (n=56)             | 20 (36%)                 | 3 (5%)                     | 7 (12.5%)                | 8 (14%)                    |
| Sexual/Reproductive health (n=34) | 10 (29%)                 | 0 (0%)                     | 1 (3%)                   | 1 (3%)                     |
| Gynaecological oncology (n=33)    | 8 (24%)                  | 0 (0%)                     | 1 (3%)                   | 1 (3%)                     |
| Reproductive medicine (n=33)      | 9 (27%)                  | 2 (6%)                     | 0                        | 2 (6%)                     |
| Urogynaecology (n=28)             | 9 (32%)                  | 4 (14%)                    | 4 (14 %)                 | 6 (21%)                    |

<sup>a</sup> Positive for burnout if emotional exhaustion score  $\geq 27$  (range 0-54) or depersonalisation score  $\geq 10$  (range 0-30) in accordance with the Maslach Burnout Inventory

<sup>b</sup> Defined as avoidance score of  $\geq 13$  (range 0-36)

<sup>c</sup> Defined as hedging score of  $\geq 5$  (range 0-12)

<sup>d</sup> DMP: Defensive Medical Practice

<sup>e</sup> Defined as presence of avoidance and/or hedging (as defined)

Table 3. Descriptive statistics of defensive practice by burnout status

| Doctor category                        | Avoidance <sup>a</sup> |                     | Hedging <sup>b</sup> |                     | Any DMP <sup>c,d</sup> |
|----------------------------------------|------------------------|---------------------|----------------------|---------------------|------------------------|
|                                        | Mean score             | % Elevated          | Mean score           | % Elevated          | %                      |
| <b>Burnout status<sup>e</sup></b>      |                        |                     |                      |                     |                        |
| <b>Consultant</b>                      |                        |                     |                      |                     |                        |
| No burnout (n=1002)                    | 1.05                   | 53 (5%)             | 3.95                 | 67 (7%)             | 101 (10%)              |
| Burnout (n=460)                        | 2.14                   | 72 (16%)            | 7.79                 | 97 (21%)            | 130 (28%)              |
| <b>SAS<sup>f</sup></b>                 |                        |                     |                      |                     |                        |
| No burnout (n=178)                     | 0.72                   | 3 (2%)              | 1.74                 | 2 (1%)              | 5 (3%)                 |
| Burnout (n=76)                         | 1.92                   | 10 (13%)            | 5.34                 | 9 (12%)             | 15 (20%)               |
| <b>Trainees</b>                        |                        |                     |                      |                     |                        |
| No burnout (n=777)                     | 0.59                   | 15 (2%)             | 3.30                 | 25 (3%)             | 36 (5%)                |
| Burnout (n=580)                        | 1.38                   | 43 (7%)             | 6.46                 | 89 (15%)            | 113 (19%)              |
| <b>All doctors</b>                     |                        |                     |                      |                     |                        |
| No burnout (n=1957)                    | 0.84                   | 71 (4%)             | 3.49                 | 94 (5%)             | 142 (7%)               |
| Burnout (n=1116)                       | 1.73                   | 125 (11%)           | 6.93                 | 195 (17%)           | 258 (23%)              |
| <b>Odds ratio<sup>g</sup> (95% CI)</b> |                        | 3.34<br>(2.48-4.53) |                      | 4.18<br>(3.24-5.43) | 3.84<br>(3.08-4.79)    |

<sup>a</sup> Scores of  $\geq 13$  (range 0-36) are considered elevated and indicate avoidance behaviour

<sup>b</sup> Scores of  $\geq 5$  (range 0-12) are considered elevated and indicate hedging behaviour

<sup>c</sup> DMP: Defensive Medical Practice

<sup>d</sup> Defined as elevated levels of avoidance and/or hedging behaviour

<sup>e</sup> Burnout defined as an emotional exhaustion score  $\geq 27$  (range 0-54) or depersonalisation score  $\geq 10$  (range 0-30) in accordance with the Maslach Burnout Inventory

<sup>f</sup> SAS: Specialty and Specialty Associate Doctors

<sup>g</sup> Odds ratios are based on univariable logistic regression with Firth bias correction

Table 4. Descriptive statistics of self-reported wellbeing, and odds ratios (with 95% Confidence Intervals (CI)) with burnout

|                                         | All<br>(n=3073)  | Consultants<br>(n=1462) | SAS <sup>a</sup><br>(n=254) | Trainees<br>(n=1357) |
|-----------------------------------------|------------------|-------------------------|-----------------------------|----------------------|
| <b>Cardiovascular problems</b>          | 261 (8.5)        | 186 (12.7)              | 31 (12.2)                   | 44 (3.2)             |
| No burnout                              | 148 (7.6)        | 114 (11.4)              | 20 (11.2)                   | 14 (1.8)             |
| Burnout <sup>b</sup>                    | 113 (10.1)       | 72 (15.7)               | 11 (14.5)                   | 30 (5.2)             |
| Odds ratio <sup>c</sup> (95% CI)        | 1.38 (1.07-1.78) |                         |                             |                      |
| <b>Gastro-intestinal problems</b>       | 480 (15.6)       | 221 (15.1)              | 29 (11.4)                   | 230 (16.9)           |
| No burnout                              | 225 (11.5)       | 111 (11.1)              | 14 (7.9)                    | 100 (12.9)           |
| Burnout                                 | 255 (22.8)       | 110 (23.9)              | 15 (19.7)                   | 130 (22.4)           |
| Odds ratio <sup>c</sup> (95% CI)        | 2.28 (1.87-2.78) |                         |                             |                      |
| <b>Depression</b>                       | 416 (13.5)       | 141 (9.6)               | 41 (16.1)                   | 234 (17.2)           |
| No burnout                              | 144 (7.4)        | 42 (4.2)                | 21 (11.8)                   | 81 (10.4)            |
| Burnout                                 | 272 (24.4)       | 99 (21.5)               | 20 (26.3)                   | 153 (26.4)           |
| Odds ratio <sup>c</sup> (95% CI)        | 4.05 (3.26-5.04) |                         |                             |                      |
| <b>Anxiety</b>                          | 1008 (32.8)      | 416 (28.5)              | 80 (31.5)                   | 512 (37.7)           |
| No burnout                              | 439 (22.4)       | 194 (19.4)              | 43 (24.2)                   | 202 (26.0)           |
| Burnout                                 | 569 (51.0)       | 222 (48.3)              | 37 (48.7)                   | 310 (53.4)           |
| Odds ratio <sup>c</sup> (95% CI)        | 3.59 (3.07-4.21) |                         |                             |                      |
| <b>Anger-irritability</b>               | 1048 (34.1)      | 498 (34.1)              | 81 (31.9)                   | 469 (34.6)           |
| No burnout                              | 465 (23.8)       | 235 (23.5)              | 42 (23.6)                   | 188 (24.2)           |
| Burnout                                 | 583 (52.2)       | 263 (57.2)              | 39 (51.3)                   | 281 (48.4)           |
| Odds ratio <sup>c</sup> (95% CI)        | 3.51 (3.00-4.10) |                         |                             |                      |
| <b>Suicidal thoughts</b>                | 90 (2.9)         | 33 (2.3)                | 2 (0.8)                     | 55 (4.1)             |
| No burnout                              | 20 (1.0)         | 5 (0.5)                 | 0                           | 15 (1.9)             |
| Burnout                                 | 70 (6.3)         | 28 (6.1)                | 2 (2.6)                     | 40 (6.9)             |
| Odds ratio <sup>c</sup> (95% CI)        | 6.37 (3.95-10.7) |                         |                             |                      |
| <b>Sleep problems / insomnia</b>        | 1188 (38.7)      | 515 (35.2)              | 93 (36.6)                   | 580 (42.7)           |
| No burnout                              | 563 (28.8)       | 256 (25.5)              | 52 (29.2)                   | 255 (32.8)           |
| Burnout                                 | 625 (56.0)       | 259 (56.3)              | 41 (53.9)                   | 325 (56.0)           |
| Odds ratio <sup>c</sup> (95% CI)        | 3.15 (2.70-3.67) |                         |                             |                      |
| <b>Marital/relationship problems</b>    | 544 (17.7)       | 206 (14.1)              | 43 (16.9)                   | 295 (21.7)           |
| No burnout                              | 241 (12.3)       | 105 (10.5)              | 20 (11.2)                   | 116 (14.9)           |
| Burnout                                 | 303 (27.2)       | 101 (22.0)              | 23 (30.3)                   | 179 (30.9)           |
| Odds ratio <sup>c</sup> (95% CI)        | 2.65 (2.20-3.20) |                         |                             |                      |
| <b>Frequent headaches</b>               | 652 (21.2)       | 210 (14.4)              | 77 (30.3)                   | 365 (26.9)           |
| No burnout                              | 317 (16.2)       | 107 (10.7)              | 37 (20.8)                   | 173 (22.3)           |
| Burnout                                 | 335 (30.0)       | 103 (22.4)              | 40 (52.6)                   | 192 (33.1)           |
| Odds ratio <sup>c</sup> (95% CI)        | 2.22 (1.86-2.64) |                         |                             |                      |
| <b>Minor colds</b>                      | 812 (26.4)       | 268 (18.3)              | 59 (23.2)                   | 485 (35.7)           |
| No burnout                              | 449 (22.9)       | 165 (16.5)              | 42 (23.6)                   | 242 (31.1)           |
| Burnout                                 | 363 (32.5)       | 103 (22.4)              | 17 (22.4)                   | 243 (41.9)           |
| Odds ratio <sup>c</sup> (95% CI)        | 1.62 (1.37-1.91) |                         |                             |                      |
| <b>Recurrent respiratory infections</b> | 188 (6.1)        | 66 (4.5)                | 16 (6.3)                    | 106 (7.8)            |
| No burnout                              | 81 (4.1)         | 31 (3.1)                | 10 (5.6)                    | 40 (5.1)             |
| Burnout                                 | 107 (9.6)        | 35 (7.6)                | 6 (7.9)                     | 66 (11.4)            |
| Odds ratio <sup>c</sup> (95% CI)        | 2.45 (1.82-3.31) |                         |                             |                      |
| <b>Alcohol/drugs problems</b>           | 97 (3.2)         | 56 (3.8)                | 4 (1.6)                     | 37 (2.7)             |
| No burnout                              | 40 (2.0)         | 24 (2.4)                | 2 (1.1)                     | 14 (1.8)             |
| Burnout                                 | 57 (5.1)         | 32 (7.0)                | 2 (2.6)                     | 23 (4.0)             |
| Odds ratio <sup>c</sup> (95% CI)        | 2.57 (1.71-3.89) |                         |                             |                      |

1  
2  
3 <sup>a</sup> SAS: Specialty and Specialty Associate Doctors

4 <sup>b</sup> Burnout defined as an emotional exhaustion score  $\geq 27$  (range 0-54) or depersonalisation  
5 score  $\geq 10$  (range 0-30) in accordance with the Maslach Burnout Inventory

6 <sup>c</sup> Odds ratio based on univariable Firth corrected logistic regression of wellbeing item vs  
7 burnout with stratification for group (consultant, SAS, trainee)  
8  
9  
10  
11  
12  
13  
14  
15  
16  
17  
18  
19  
20  
21  
22  
23  
24  
25  
26  
27  
28  
29  
30  
31  
32  
33  
34  
35  
36  
37  
38  
39  
40  
41  
42  
43  
44  
45  
46  
47  
48  
49  
50  
51  
52  
53  
54  
55  
56  
57  
58  
59  
60

For peer review only

Table 5. Univariable and multivariable logistic regression results (using Firth bias correction).

| Predictor variable                                                   | Burnout <sup>a</sup>  |                      | Any DMP <sup>b</sup> |                      |
|----------------------------------------------------------------------|-----------------------|----------------------|----------------------|----------------------|
|                                                                      | Crude OR <sup>c</sup> | Adjusted OR          | Crude OR             | Adjusted OR          |
| Grade (versus consultants)                                           |                       |                      |                      |                      |
| SAS <sup>d</sup>                                                     | 0.93<br>(0.70; 1.24)  | 1.14<br>(0.83; 1.55) | 0.47<br>(0.28; 0.73) | 0.40<br>(0.23; 0.65) |
| Trainees                                                             | 1.63<br>(1.39; 1.90)  | 1.00<br>(0.77; 1.31) | 0.66<br>(0.53; 0.82) | 0.47<br>(0.32; 0.70) |
| Age (per 5 years)                                                    | 0.87<br>(0.84; 0.90)  | 0.92<br>(0.87; 0.98) | 1.04<br>(0.99; 1.09) | 0.93<br>(0.85; 1.02) |
| Female (versus male)                                                 | 1.12<br>(0.95; 1.31)  | 0.97<br>(0.81; 1.16) | 0.70<br>(0.56; 0.87) | 0.70<br>(0.55; 0.89) |
| Ethnicity (versus white)                                             |                       |                      |                      |                      |
| Asian                                                                | 0.54<br>(0.45; 0.65)  | 0.74<br>(0.60; 0.91) | 0.98<br>(0.77; 1.25) | 1.15<br>(0.85; 1.54) |
| Black                                                                | 0.57<br>(0.41; 0.78)  | 0.73<br>(0.51; 1.02) | 0.79<br>(0.48; 1.24) | 0.90<br>(0.53; 1.47) |
| Mixed                                                                | 0.75<br>(0.54; 1.03)  | 0.82<br>(0.58; 1.15) | 1.53<br>(1.01; 2.27) | 1.89<br>(1.21; 2.89) |
| Other                                                                | 1.37<br>(0.88; 2.12)  | 2.19<br>(1.37; 3.52) | 0.84<br>(0.40; 1.59) | 0.64<br>(0.29; 1.30) |
| Parity                                                               | 0.53<br>(0.46; 0.62)  | 0.78<br>(0.64; 0.97) | 1.10<br>(0.88; 1.38) | 1.03<br>(0.75; 1.41) |
| Current relationship                                                 | 0.65<br>(0.54; 0.78)  | 0.87<br>(0.70; 1.07) | 1.06<br>(0.82; 1.40) | 1.07<br>(0.79; 1.46) |
| Medical Qualification from United Kingdom/Ireland (vs other country) | 2.13<br>(1.81; 2.51)  | 1.74<br>(1.41; 2.16) | 1.06<br>(0.85; 1.33) | 0.84<br>(0.63; 1.14) |
| Full time (vs Less Than Full Time)                                   | 1.30<br>(1.06; 1.59)  | 1.28<br>(1.02; 1.62) | 1.19<br>(0.90; 1.61) | 0.91<br>(0.65; 1.27) |
| Burnout                                                              |                       |                      | 3.84<br>(3.08; 4.79) | 4.35<br>(3.46; 5.49) |

<sup>a</sup>Burnout defined as an emotional exhaustion score  $\geq 27$  (range 0-54) or depersonalisation score  $\geq 10$  (range 0-30) in accordance with the Maslach Burnout Inventory

<sup>b</sup>Defensive medical practice (DMP) defined as elevated levels of avoidance and/or hedging behaviour

<sup>c</sup>OR: Odds Ratio

<sup>d</sup>SAS: Specialty and Specialty Associate Doctors



## Supplementary Online Content

eMethods. Defensive medical practice questionnaire items and factor structure

eTable 1. Missing data among actively practicing participants

eTable 2. Demographic data of trainees in study and Royal College of Obstetricians and Gynaecologists Training Evaluation Form (TEF) 2018 Survey

eTable 3. Spearman correlations between Maslach Burnout Inventory (MBI) and Defensive Medical Practice (DMP) subscales

eTable 4. Descriptive statistics and crude odds ratio of defensive practice according to each Maslach Burnout Inventory subscale

eFigure 1. Scatter plot matrix of Maslach Burnout Inventory and Defensive Medical Practice subscales

eFigure 2. Nomograms of the multivariable logistic regression models for burnout and any Defensive Medical Practice

eDiscussion. Survey response rate amongst trainees

## Methods. Defensive medical practice questionnaire items and factor structure

For each of the following, respondents were asked to rate each item on a 5-point Likert scale (ranging from never to often).

### Avoidance (3 items)

- Avoided a particular type of invasive procedure
- Not accepted "high risk" patients in order to avoid possible complications
- Stopped doing aspects of your job

### Hedging (9 items)

- Prescribed more medications than medically indicated
- Referred to specialists in unnecessary circumstances
- Conducted more investigations or made more referrals than warranted by the patient's condition
- Admitted patients to hospital when the patient could have been discharged home safely or managed as an outpatient
- Asked for more frequent observations to be carried out on a patient than necessary
- Written in patients' records specific remarks such as "not suicidal" which you would not if you were not worried about legal/media/disciplinary consequences
- Written more letters about a patient than is necessary to communicate about the patient's condition
- Referred patient for a second opinion more than necessary
- Carried out more tests than necessary

**eTable 1. Missing data among actively practicing participants**

|                                                | <b>Consultants<br/>N=1462</b> | <b>SAS<sup>a</sup><br/>N=254</b> | <b>Trainees<br/>N=1357</b> |
|------------------------------------------------|-------------------------------|----------------------------------|----------------------------|
| Age, mean (range)                              | None missing                  | None missing                     | None missing               |
| Gender                                         | 19 (1%)                       | 2 (1%)                           | 20 (1%)                    |
| Ethnicity                                      | 10 (1%)                       | 1 (<1%)                          | 8 (1%)                     |
| Parity                                         | None missing                  | None missing                     | None missing               |
| Relationship                                   | 3 (<1%)                       | None missing                     | 5 (<1%)                    |
| Medical Qualification country of origin        | None missing                  | 1 (<1%)                          | 1 (<1%)                    |
| Work status (Full Time vs Less Than Full Time) | None missing                  | 1 (<1%)                          | 2 (<1%)                    |
| Maslach Burnout Inventory                      | None missing                  | None missing                     | None missing               |
| Defensive practice                             | None missing                  | None missing                     | None missing               |

<sup>a</sup>SAS: Specialty and Specialty Associate Doctors

**eTable 2. Demographic data of trainees in study and Royal College of Obstetricians and Gynaecologists (RCOG) Training Evaluation Form (TEF) 2018 Survey**

|              | <b>RCOG TEF Database<br/>(n=1754) (%)<sup>a</sup></b> | <b>Trainees<br/>(n=1357) (%)</b> |
|--------------|-------------------------------------------------------|----------------------------------|
| Age          |                                                       |                                  |
| 20-29        | 497 (28.3%)                                           | 336 (24.8%)                      |
| 30-29        | 1092 (62.3%)                                          | 897 (66.1%)                      |
| 40-49        | 106 (6.0%)                                            | 115 (8.4%)                       |
| 50-59        | 2 (0.1%)                                              | 9 (0.7%)                         |
| Over 60      | 0                                                     | 0                                |
| Missing data | 57 (3.3%)                                             | 0                                |
| Female       | 1387 (79.1%)                                          | 1067 (79.8%)                     |
| Ethnicity    |                                                       |                                  |
| White        | 1108 (63.2%)                                          | 857 (63.2%)                      |
| Asian        | 381 (21.7%)                                           | 288 (21.2%)                      |
| Black        | 97 (5.5%)                                             | 90 (6.6%)                        |
| Mixed        | 83 (4.7%)                                             | 88 (6.5%)                        |
| Other        | 68 (3.9%)                                             | 26 (1.9%)                        |
| Missing data | 17 (1%)                                               | 8 (0.6%)                         |

<sup>a</sup> RCOG TEF survey sent to 1956 trainees who held a National Training Number and an email address associated with an active ePortfolio at the time of the survey, which is used to assess competencies and training progress. It was responded to by 1754 trainees (89.7% response rate).

**eTable 3. Spearman correlations between Maslach Burnout Inventory and defensive medical practice subscales**

|                             | <b>EE<sup>b</sup></b> | <b>DP<sup>c</sup></b> | <b>PA<sup>d</sup></b> | <b>Av<sup>e</sup></b> | <b>He<sup>f</sup></b> |
|-----------------------------|-----------------------|-----------------------|-----------------------|-----------------------|-----------------------|
| <b>MBI<sup>a</sup> – EE</b> | 1                     |                       |                       |                       |                       |
| <b>MBI – DP</b>             | 0.57                  | 1                     |                       |                       |                       |
| <b>MBI – PA</b>             | -0.30                 | -0.34                 | 1                     |                       |                       |
| <b>Av</b>                   | 0.28                  | 0.30                  | -0.19                 | 1                     |                       |
| <b>He</b>                   | 0.34                  | 0.38                  | -0.17                 | 0.41                  | 1                     |

<sup>a</sup> MBI: Maslach Burnout Inventory

<sup>b</sup> EE: Emotional Exhaustion

<sup>c</sup> DP: Depersonalization

<sup>d</sup> PA: Personal Accomplishment

<sup>e</sup> Av: Avoidance

<sup>f</sup> He: Hedging

For peer review only

**eTable 4. Descriptive statistics of defensive practice according to each Maslach Burnout Inventory (MBI) subscale**

| MBI <sup>a</sup> subscales       | Avoidance  |                     | Hedging    |                     | Any DMP <sup>b</sup> |
|----------------------------------|------------|---------------------|------------|---------------------|----------------------|
|                                  | Mean score | % Elevated          | Mean score | % Elevated          | %                    |
| High emotional exhaustion        |            |                     |            |                     |                      |
| No (n=2157)                      | 0.88       | 85 (4%)             | 3.76       | 125 (6%)            | 179 (8%)             |
| Yes (n=916)                      | 1.82       | 111 (12%)           | 7.05       | 164 (18%)           | 221 (24%)            |
| Odds ratio <sup>c</sup> (95% CI) |            | 3.36<br>(2.51-4.51) |            | 3.54<br>(2.77-4.54) | 3.51<br>(2.83-4.36)  |
| High depersonalization           |            |                     |            |                     |                      |
| No (n=2468)                      | 0.95       | 106 (4%)            | 3.93       | 159 (6%)            | 229 (9%)             |
| Yes (n=605)                      | 2.02       | 90 (15%)            | 8.06       | 130 (21%)           | 171 (28%)            |
| Odds ratio <sup>c</sup> (95% CI) |            | 3.89<br>(2.89-5.23) |            | 3.97<br>(3.09-5.11) | 3.85<br>(3.08-4.81)  |
| Low personal accomplishment      |            |                     |            |                     |                      |
| No (n=2066)                      | 0.97       | 103 (5%)            | 4.19       | 142 (7%)            | 202 (10%)            |
| Yes (n=1007)                     | 1.55       | 93 (9%)             | 5.87       | 147 (15%)           | 198 (20%)            |
| Odds ratio <sup>c</sup> (95% CI) |            | 1.94<br>(1.45-2.59) |            | 2.31<br>(1.81-2.96) | 2.26<br>(1.83-2.79)  |

<sup>a</sup> MBI: Maslach Burnout Inventory

<sup>b</sup> DMP: Defensive Medical Practice

<sup>c</sup> Odds ratios are based on univariable logistic regression with Firth bias correction.

**eFigure 1. Scatter plot matrix of Maslach Burnout Inventory and Defensive Medical Practice subscales (with histograms on the diagonal)**

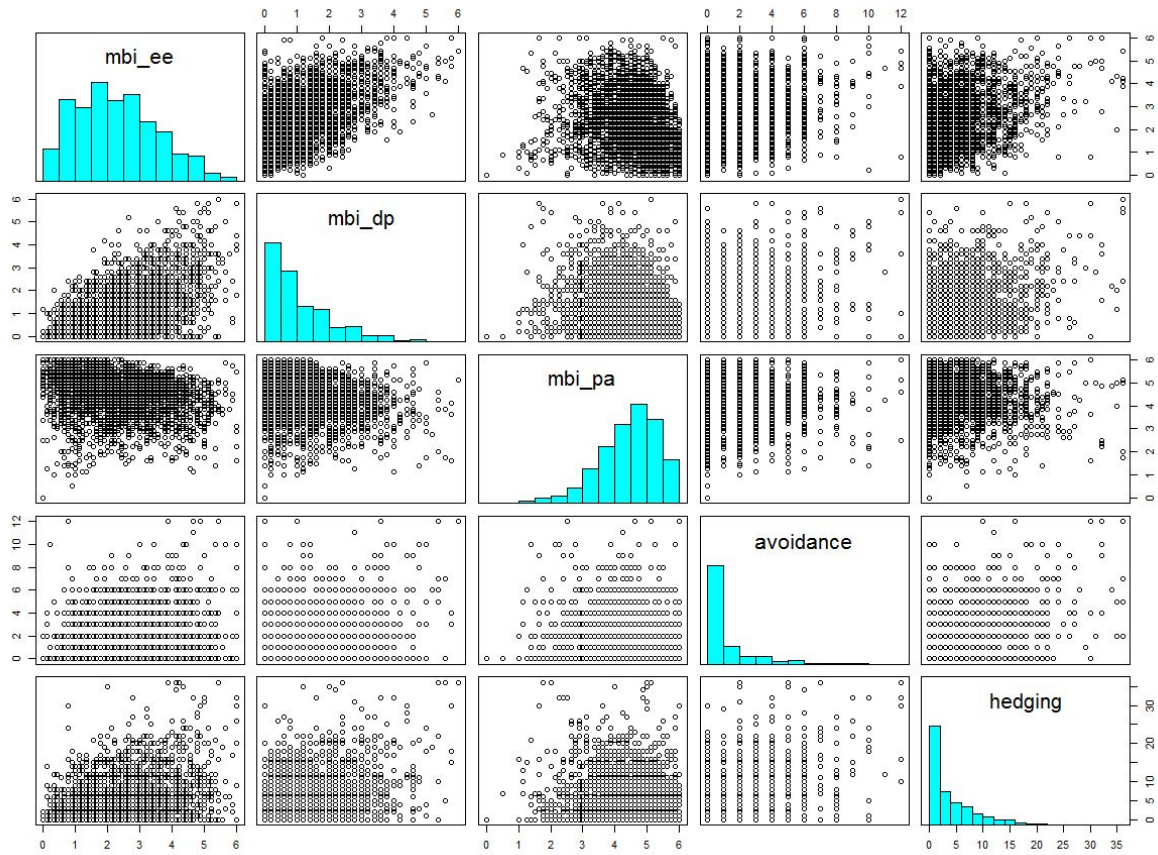

The diagonal shows histograms of each subscale. Off-diagonal plots show scatter plots between two subscales.

**eFigure 2. Nomograms of the multivariable logistic regression models for burnout (A) and any defensive medical practice (B)**

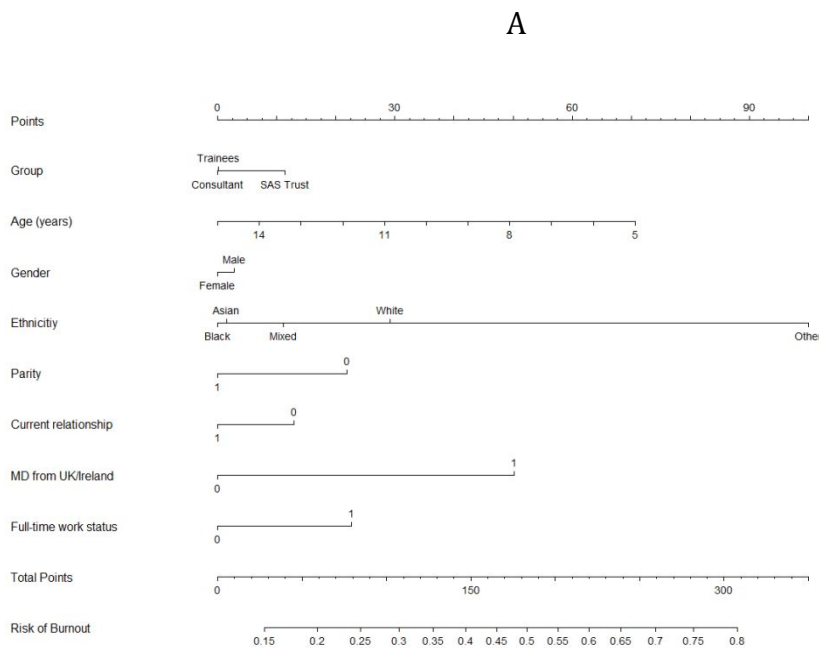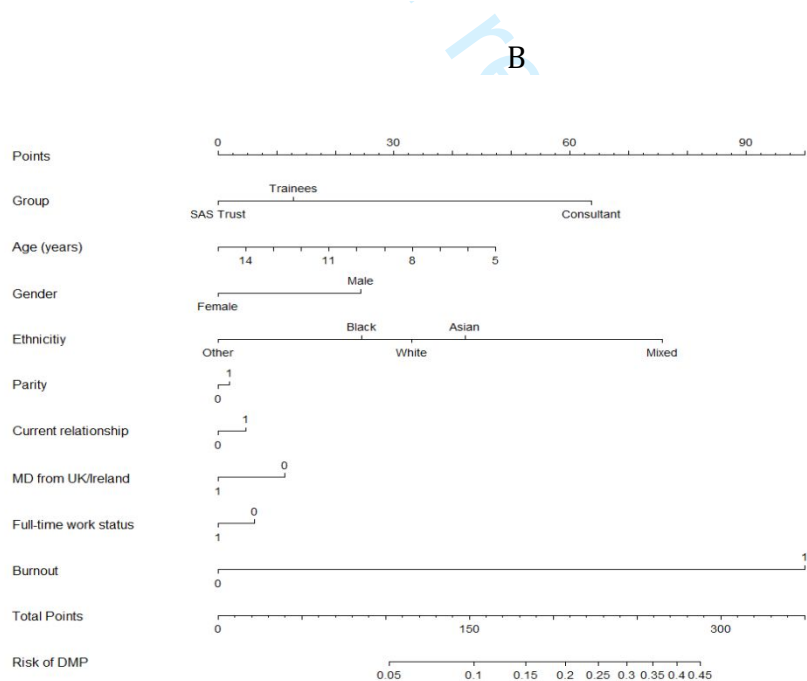



### **eDiscussion. Survey response rate amongst trainees**

Our survey study was sent to trainees working in Obstetrics and Gynecology in the United Kingdom, registered with the Royal College of Obstetricians and Gynaecologists (RCOG) and identified as trainees on the RCOG main database (n=2375) which is the system from which data is extracted for mailings. This is not however the same list used to distribute the RCOG TEF survey (n=1956, eTable 2 in the Supplement) which is sent to trainees who currently hold a National Training Number and an email address associated with an active ePortfolio, which is used to assess competencies and training progress. In view of this, we believe that a proportion of trainees to whom our survey was sent to (based on being identified as a trainee on the RCOG main database) are likely to have been left on the distribution list, but have in fact subsequently suspended training for a period of time or who are no longer trainees and have not informed the RCOG. These doctors would therefore not have completed the survey. This may account for a proportion of the difference in the numbers of trainees between the mailing list we used and that used for the RCOG TEF survey.

For peer review only

STROBE Statement—Checklist of items that should be included in reports of *cohort studies*

|                              | Item No | Recommendation                                                                                                                                                                                                                                                                                                         | Page No                              |
|------------------------------|---------|------------------------------------------------------------------------------------------------------------------------------------------------------------------------------------------------------------------------------------------------------------------------------------------------------------------------|--------------------------------------|
| <b>Title and abstract</b>    | 1       | (a) Indicate the study's design with a commonly used term in the title or the abstract<br>(b) Provide in the abstract an informative and balanced summary of what was done and what was found                                                                                                                          | 1<br>2-3                             |
| <b>Introduction</b>          |         |                                                                                                                                                                                                                                                                                                                        |                                      |
| Background/rationale         | 2       | Explain the scientific background and rationale for the investigation being reported                                                                                                                                                                                                                                   | 4-6                                  |
| Objectives                   | 3       | State specific objectives, including any prespecified hypotheses                                                                                                                                                                                                                                                       | 6-7                                  |
| <b>Methods</b>               |         |                                                                                                                                                                                                                                                                                                                        |                                      |
| Study design                 | 4       | Present key elements of study design early in the paper                                                                                                                                                                                                                                                                | 7                                    |
| Setting                      | 5       | Describe the setting, locations, and relevant dates, including periods of recruitment, exposure, follow-up, and data collection                                                                                                                                                                                        | 7                                    |
| Participants                 | 6       | (a) Give the eligibility criteria, and the sources and methods of selection of participants. Describe methods of follow-up<br>(b) For matched studies, give matching criteria and number of exposed and unexposed                                                                                                      | 7-8                                  |
| Variables                    | 7       | Clearly define all outcomes, exposures, predictors, potential confounders, and effect modifiers. Give diagnostic criteria, if applicable                                                                                                                                                                               | 8-9                                  |
| Data sources/<br>measurement | 8*      | For each variable of interest, give sources of data and details of methods of assessment (measurement). Describe comparability of assessment methods if there is more than one group                                                                                                                                   | 8-9                                  |
| Bias                         | 9       | Describe any efforts to address potential sources of bias                                                                                                                                                                                                                                                              | N/A                                  |
| Study size                   | 10      | Explain how the study size was arrived at                                                                                                                                                                                                                                                                              | N/A                                  |
| Quantitative variables       | 11      | Explain how quantitative variables were handled in the analyses. If applicable, describe which groupings were chosen and why                                                                                                                                                                                           | 9-10                                 |
| Statistical methods          | 12      | (a) Describe all statistical methods, including those used to control for confounding<br>(b) Describe any methods used to examine subgroups and interactions<br>(c) Explain how missing data were addressed<br>(d) If applicable, explain how loss to follow-up was addressed<br>(e) Describe any sensitivity analyses | 9-10<br>9-10<br>9-10<br>9-10<br>9-10 |
| <b>Results</b>               |         |                                                                                                                                                                                                                                                                                                                        |                                      |
| Participants                 | 13*     | (a) Report numbers of individuals at each stage of study—eg numbers potentially eligible, examined for eligibility, confirmed eligible, included in the study, completing follow-up, and analysed<br>(b) Give reasons for non-participation at each stage<br>(c) Consider use of a flow diagram                        | 10-11<br>10-11<br>N/A                |
| Descriptive data             | 14*     | (a) Give characteristics of study participants (eg demographic, clinical, social) and information on exposures and potential confounders<br>(b) Indicate number of participants with missing data for each variable of interest<br>(c) Summarise follow-up time (eg, average and total amount)                         | 10-11<br>10-11<br>N/A                |
| Outcome data                 | 15*     | Report numbers of outcome events or summary measures over time                                                                                                                                                                                                                                                         | 11                                   |

|    |                          |    |                                                                                                                                                                                                              |       |
|----|--------------------------|----|--------------------------------------------------------------------------------------------------------------------------------------------------------------------------------------------------------------|-------|
| 1  | Main results             | 16 | (a) Give unadjusted estimates and, if applicable, confounder-adjusted estimates and their precision (eg, 95% confidence interval). Make clear which confounders were adjusted for and why they were included | 11-12 |
| 2  |                          |    | (b) Report category boundaries when continuous variables were categorized                                                                                                                                    | 11-12 |
| 3  |                          |    | (c) If relevant, consider translating estimates of relative risk into absolute risk for a meaningful time period                                                                                             | N/A   |
| 4  | Other analyses           | 17 | Report other analyses done—eg analyses of subgroups and interactions, and sensitivity analyses                                                                                                               | 11-12 |
| 5  | <b>Discussion</b>        |    |                                                                                                                                                                                                              |       |
| 6  | Key results              | 18 | Summarise key results with reference to study objectives                                                                                                                                                     | 13    |
| 7  | Limitations              | 19 | Discuss limitations of the study, taking into account sources of potential bias or imprecision. Discuss both direction and magnitude of any potential bias                                                   | 15    |
| 8  | Interpretation           | 20 | Give a cautious overall interpretation of results considering objectives, limitations, multiplicity of analyses, results from similar studies, and other relevant evidence                                   | 14    |
| 9  | Generalisability         | 21 | Discuss the generalisability (external validity) of the study results                                                                                                                                        | 13-16 |
| 10 | <b>Other information</b> |    |                                                                                                                                                                                                              |       |
| 11 | Funding                  | 22 | Give the source of funding and the role of the funders for the present study and, if applicable, for the original study on which the present article is based                                                | 17    |

22 \*Give information separately for exposed and unexposed groups.

23 **Note:** An Explanation and Elaboration article discusses each checklist item and gives methodological background and published examples of transparent reporting. The STROBE checklist is best used in conjunction with this article (freely available on the Web sites of PLoS Medicine at <http://www.plosmedicine.org/>, Annals of Internal Medicine at <http://www.annals.org/>, and Epidemiology at <http://www.epidem.com/>). Information on the STROBE Initiative is available at <http://www.strobe-statement.org>.

# BMJ Open

## Burnout, Wellbeing and Defensive Medical Practice amongst Obstetricians and Gynaecologists in the United Kingdom: cross-sectional survey study

|                                 |                                                                                                                                                                                                                                                                                                                                                                                                                                                                                                                                                                                                                                                                                                                                                                                                                                                                         |
|---------------------------------|-------------------------------------------------------------------------------------------------------------------------------------------------------------------------------------------------------------------------------------------------------------------------------------------------------------------------------------------------------------------------------------------------------------------------------------------------------------------------------------------------------------------------------------------------------------------------------------------------------------------------------------------------------------------------------------------------------------------------------------------------------------------------------------------------------------------------------------------------------------------------|
| Journal:                        | <i>BMJ Open</i>                                                                                                                                                                                                                                                                                                                                                                                                                                                                                                                                                                                                                                                                                                                                                                                                                                                         |
| Manuscript ID                   | bmjopen-2019-030968.R1                                                                                                                                                                                                                                                                                                                                                                                                                                                                                                                                                                                                                                                                                                                                                                                                                                                  |
| Article Type:                   | Original research                                                                                                                                                                                                                                                                                                                                                                                                                                                                                                                                                                                                                                                                                                                                                                                                                                                       |
| Date Submitted by the Author:   | 04-Sep-2019                                                                                                                                                                                                                                                                                                                                                                                                                                                                                                                                                                                                                                                                                                                                                                                                                                                             |
| Complete List of Authors:       | Bourne, Tom; Imperial College London, Obstetrics and Gynaecology, Queen Charlotte's and Chelsea Hospital; KU Leuven, Department of Development & Regeneration<br>Shah, Harsha; Imperial College London, Obstetrics and Gynaecology, Queen Charlotte's and Chelsea Hospital<br>Falconieri, Nora; KU Leuven, Department of Development & Regeneration<br>Timmerman, Dirk; KU Leuven, Department of Development & Regeneration<br>Lees, Christoph; Imperial College London, Obstetrics and Gynaecology, Queen Charlotte's and Chelsea Hospital<br>Wright, Alison; Royal Free Hospital<br>Lumsden, Mary Ann; University of Glasgow, Department of Obstetrics and Gynaecology<br>Regan, Lesley; Imperial College Healthcare NHS Trust, Department of Obstetrics and Gynaecology, St Mary's Hospital<br>Van Calster, Ben; KU Leuven, Department of Development & Regeneration |
| <b>Primary Subject Heading</b>: | Health services research                                                                                                                                                                                                                                                                                                                                                                                                                                                                                                                                                                                                                                                                                                                                                                                                                                                |
| Secondary Subject Heading:      | Obstetrics and gynaecology, Health policy                                                                                                                                                                                                                                                                                                                                                                                                                                                                                                                                                                                                                                                                                                                                                                                                                               |
| Keywords:                       | OBSTETRICS, GYNAECOLOGY, Health policy < HEALTH SERVICES ADMINISTRATION & MANAGEMENT                                                                                                                                                                                                                                                                                                                                                                                                                                                                                                                                                                                                                                                                                                                                                                                    |
|                                 |                                                                                                                                                                                                                                                                                                                                                                                                                                                                                                                                                                                                                                                                                                                                                                                                                                                                         |

SCHOLARONE™  
Manuscripts

1  
2  
3 **Burnout, Wellbeing and Defensive Medical Practice amongst Obstetricians and**  
4  
5 **Gynaecologists in the United Kingdom: Cross-sectional survey study**  
6

7 Tom Bourne, Harsha Shah, Nora Falconieri, Dirk Timmerman, Christoph Lees, Alison Wright,  
8

9 Mary-Ann Lumsden, Lesley Regan, Ben Van Calster  
10

11  
12 Department of Obstetrics and Gynaecology, Queen Charlotte's and Chelsea Hospital,  
13 Imperial College, London, W12 0HS, United Kingdom, Tom Bourne  
14 Professor of Practice  
15

16  
17 Department of Obstetrics and Gynaecology, Queen Charlotte's and Chelsea Hospital,  
18 Imperial College, London, W12 0HS, United Kingdom, Harsha Shah  
19 Clinical Research Fellow  
20

21 KU Leuven, Department of Development & Regeneration, Herestraat 49 box 805, 3000  
22 Leuven, Belgium, Nora Falconieri  
23 PhD Student  
24

25  
26 KU Leuven, Department of Development & Regeneration, Herestraat 49 box 805, 3000  
27 Leuven, Belgium, Dirk Timmerman  
28 Professor of Obstetrics and Gynaecology  
29

30  
31 Department of Obstetrics and Gynaecology, Queen Charlotte's and Chelsea Hospital,  
32 Imperial College, London, W12 0HS, United Kingdom, Christoph Lees  
33 Professor of Obstetrics  
34

35  
36 Department of Obstetrics and Gynaecology, Royal Free Hospital, London, NW3 2QG, United  
37 Kingdom, Alison Wright  
38 Consultant Obstetrician and Gynaecologist  
39

40  
41 Department of Obstetrics and Gynaecology, University of Glasgow, G12 8QQ, United  
42 Kingdom, Mary-Ann Lumsden  
43 Professor of Medical Education and Gynaecology  
44

45  
46 Department of Obstetrics and Gynaecology, St Mary's Hospital, Imperial College NHS Trust,  
47 London, W2 1NY, United Kingdom, Lesley Regan  
48 Professor of Obstetrics and Gynaecology  
49

50  
51 KU Leuven, Department of Development & Regeneration, Herestraat 49 box 805, 3000  
52 Leuven, Belgium, Ben Van Calster  
53 Professor of Statistics  
54

55  
56 Correspondence to: Tom Bourne [t.bourne@imperial.ac.uk](mailto:t.bourne@imperial.ac.uk)  
57

58  
59 **Keywords: Burnout, Defensive Practice, Doctors, Patient safety**  
60

**Manuscript word count: 3734**

## Abstract

**Objectives:** To determine the prevalence of burnout in doctors practising obstetrics and gynaecology, and assess the association with defensive medical practice and self-reported wellbeing.

**Design:** Nationwide online cross-sectional survey study; December 2017-March 2018.

**Setting:** Hospitals in the United Kingdom

**Participants:** 5661 practising Obstetrics and Gynaecology consultants, specialty and associate specialist doctors and trainees registered with the Royal College of Obstetricians and Gynaecologists

**Primary and Secondary Outcome Measures:** Prevalence of burnout using the Maslach Burnout Inventory and defensive medical practice (avoiding cases or procedures, overprescribing, over-referral) using a 12-item questionnaire. The odds ratios of burnout with defensive medical practice and self-reported wellbeing.

**Results:** 3102/5661 doctors (55%) completed the survey. 3073/3102 (99%) met the inclusion criteria (1462 consultants, 1357 trainees and 254 specialty and associate specialist doctors). 1116/3073 (36%) doctors met the burnout criteria, with levels highest amongst trainees (580/1357 [43%]). 258/1116 (23%) doctors with burnout reported increased defensive practice compared to 142/1957 (7%) without (adjusted odds ratio 4.35, 95% CI 3.46 to 5.49). Odds ratios of burnout with wellbeing items varied between 1.38 and 6.37, and were highest for anxiety (3.59, 95% CI 3.07 to 4.21), depression (4.05, 95% CI 3.26 to 5.04), and suicidal thoughts (6.37, 95% CI 3.95 to 10.7). In multivariable logistic regression, being of younger age, white or 'other' ethnicity, and graduating with a medical degree from the UK or Ireland had the strongest associations with burnout.

1  
2  
3 **Conclusions:** High levels of burnout were observed in obstetricians and gynaecologists and  
4  
5 particularly amongst trainees. Burnout was associated with both increased defensive  
6  
7 medical practice and worse doctor wellbeing. These findings have implications for the  
8  
9 wellbeing and retention of doctors as well as the quality of patient care, and may help to  
10  
11 inform the content of future interventions aimed at preventing burnout and improving  
12  
13 patient safety.  
14  
15  
16  
17  
18  
19  
20  
21  
22  
23  
24  
25  
26  
27  
28  
29  
30  
31  
32  
33  
34  
35  
36  
37  
38  
39  
40  
41  
42  
43  
44  
45  
46  
47  
48  
49  
50  
51  
52  
53  
54  
55  
56  
57  
58  
59  
60

For peer review only

### Article Summary - Strengths and limitations of this study

- First nationwide survey in the United Kingdom which examines the prevalence of burnout as well as its relationship to defensive medical practice and self-reported wellbeing
- This study includes a large number of doctors working in obstetrics and gynaecology and has a good response rate
- Use of the Maslach Burnout Inventory, a widely available and validated tool for measuring burnout amongst doctors allows for comparison with other research in this field
- The study is limited by the fact that it is cross-sectional in design which introduces the possibility of selection bias; this must be considered when interpreting the findings



## Introduction

Doctor burnout and mental wellbeing is an important concern internationally(1-5) because of the high reported prevalence(6) and serious consequences for both staff and patients.(7) Burnout syndrome, which is a response to prolonged exposure to occupational stress, is characterised by three dimensions: emotional exhaustion, depersonalisation and reduced personal accomplishment.(8) International studies have shown that burnout is nearly twice as common amongst doctors compared with other healthcare workers.(7) A recent survey by the General Medical Council reported that 24% of trainees and 21% of trainers from across the United Kingdom (UK) described 'feeling burnt out' based on self-reported symptoms.(9) The consequences of burnout amongst doctors have been investigated primarily in the United States (USA)(10) with relatively few large studies conducted in Europe(11-16) and Asia(17, 18) to validate these findings internationally. These include a negative impact on health including higher rates of substance abuse, depression, suicide and a poorer quality of life.(19, 20) Moreover, burnout in doctors has a significant impact on the productivity of healthcare organisations, intentions to leave medical practice, and both the quality and safety of patient care.(21-25) At present, it is unclear if these findings and the proposed interventions can be extrapolated to the United Kingdom (UK) due to a paucity of data on doctor burnout in this setting.(26, 27)

Evidence from studies in Europe(15, 28) and the USA(2) suggest that burnout may be experienced by up to half of doctors in obstetrics and gynaecology (O&G),(29, 30) and that the prevalence of burnout in O&G is one of the highest of any specialty. This may be related to the high-acuity and rapid turnover of patients associated with O&G (31). Burnout is also associated with increased job turnover and reduced workforce retention.(32, 33)

Furthermore, a key consequence of doctor burnout is the impact on patient care. A recent meta-analysis suggested burnt out doctors are twice as likely to be involved in patient safety

1  
2  
3 incidents and deliver a lower quality of patient care.(34) This is a significant issue in O&G, a  
4 specialty already associated with high levels of litigation(35) with obstetric claim settlements  
5 costing the NHS over £500 million annually.(36) These high litigation rates are partly  
6 attributable to the large number of safety incidents and complaints(37, 38) and a parallel  
7 culture of intolerance when errors are made. The overall impact of this 'complaints culture'  
8 on doctors is substantial.(39) A UK wide study on the impact of complaints on doctor welfare  
9 demonstrated that they are associated with an increased risk of depression, anxiety and  
10 suicidal ideation as well as increased defensive practice.(40-42) Defensive medical  
11 practice (DMP) is defined as a doctor's deviation from standard practice in response to  
12 complaints or criticism(43) which can potentially harm patients as a result of either over-  
13 investigation and treatment or because clinicians avoid involvement in difficult cases.(35) A  
14 small study of DMP among UK doctors demonstrated that 26.4% of O&G doctors report  
15 practising some form of defensive medicine(35, 43). Although the overall effect and cost of  
16 the practice of defensive medicine has not been established in the UK, it is thought to  
17 represent a highly significant strain on healthcare resources and in the USA, it is estimated  
18 to cost \$46 billion annually.(44)

19  
20  
21  
22  
23  
24  
25  
26  
27  
28  
29  
30  
31  
32  
33  
34  
35  
36  
37  
38  
39  
40  
41 There has been great focus by the UK government through initiatives such as 'The Maternal  
42 and Neonatal Health Safety Collaborative'(45) to implement strategies which aim to improve  
43 maternity safety and outcomes. A facet of this work involves 'understanding the culture' of  
44 the O&G workforce.(45) However, to our knowledge, there is currently no quantitative data  
45 relating to burnout amongst doctors working in O&G in the UK to inform policy and  
46 potential interventions in relation to NHS workforce sustainability (46) as well as any  
47 impacts on the quality of patient care (6). Thus, there is a clear need to identify the  
48 prevalence and factors associated with burnout amongst doctors. We conducted a  
49 nationwide cross-sectional survey study to assess burnout, defensive medical practice and  
50  
51  
52  
53  
54  
55  
56  
57  
58  
59  
60

1  
2  
3 associated personal and work factors in O&G doctors in the UK. The aims were firstly to  
4 ascertain the prevalence of burnout in the cohort, secondly to determine the levels of DMP  
5 and doctor wellbeing and explore their relationship with burnout. Finally, we aimed to  
6 explore the relationships between age, gender, ethnicity, doctor seniority, and both burnout  
7 and DMP.  
8  
9  
10  
11  
12  
13  
14  
15  
16

## 17 **Methods**

18 All consultants (equivalent to an attending physician in the USA), specialty and specialty  
19 associate (SAS) doctors (doctors who have completed specialist training but do not have a  
20 staff position) and trainees (equivalent to a resident or fellow in the USA) working in  
21 Obstetrics and Gynaecology in the United Kingdom and registered with the Royal College of  
22 Obstetricians and Gynaecologists (RCOG) were invited to participate in this study between  
23 December 2017 and March 2018. Registration with the RCOG is mandatory. Doctors were  
24 sent an email containing information describing the study and a link to an encrypted online  
25 questionnaire. We made it clear to the participants in the invitation email that their  
26 participation was voluntary and that responses would be both anonymous and untraceable.  
27 Informed consent was implied upon return of the survey. Unique surveys were created for  
28 each of the grades described and sent as part of the annual RCOG Workforce and Welfare  
29 survey that collects data about doctors' clinical practice and working patterns. During the  
30 survey period, 4 reminders were sent out. All actively practising doctors were included as  
31 well as doctors who were on sick leave, maternity leave, or suspended from practice.  
32 Exclusion criteria included doctors who are fully retired, on a career break, in between jobs,  
33 not working in the UK at the time of the survey or those who are currently not employed.  
34  
35  
36  
37  
38  
39  
40  
41  
42  
43  
44  
45  
46  
47  
48  
49  
50  
51  
52  
53  
54  
55

## 56 **The Survey**

1  
2  
3 We used a cross-sectional survey design with three participant groups: consultants, SAS  
4  
5 doctors and trainees. We estimate that the time taken to complete the questionnaire was  
6  
7 20 minutes.  
8  
9

10  
11 All participants were asked to provide information on demographic variables, including age,  
12  
13 gender, ethnicity (Office of National Statistics classification(47)), relationship status and if  
14  
15 they have children. In addition, they were asked about some job and organisational factors  
16  
17 such as rota design and career or retirement plans which were tailored to the participant  
18  
19 group. These parameters were chosen based on previous studies suggesting that they have  
20  
21 an association with burnout.(48) The main outcomes and measures – the Maslach Burnout  
22  
23 Inventory Human Services Survey for Medical Personnel(49) (MBI), defensive medical  
24  
25 practice questionnaire and questions concerning wellbeing were the same for all groups. A  
26  
27 copy of the survey (excluding the copyright restricted MBI) can be found in eMethods in the  
28  
29 Supplement.  
30  
31  
32  
33  
34  
35  
36

## 37 **Main Outcomes and Measures**

### 38 **Symptoms of Burnout**

39  
40 We measured burnout using the Maslach Burnout Inventory Human Services Survey for  
41  
42 Medical Personnel(49) (MBI), a validated 22-item tool to identify and characterise burnout.  
43  
44 The MBI has three subscales to evaluate the 3 domains of burnout: emotional exhaustion  
45  
46 (EE), depersonalisation (DP), and low personal accomplishment (PA). As in previous studies  
47  
48 and according to convention,(10, 48, 49) burnout was defined as high EE (scores of 27 or  
49  
50 greater; possible score range from 0-54), and/or high DP (scores of 10 or greater; possible  
51  
52 score range from 0-30) as opposed to a total score. The PA score was also measured with  
53  
54 low PA defined as scores of 33 or lower (possible score range from 0-48) but this was not  
55  
56 used as a criterion for burnout in line with previous published work on the subject.(48)  
57  
58  
59  
60

### **Defensive Medical Practice**

DMP was assessed using a 12-item questionnaire which has previously been developed and described.<sup>(40, 42)</sup> Items are measured on a 5-point Likert scale (ranging from never to often). Nine items quantify 'hedging' behaviour, which is when doctors are overcautious, leading to overprescribing or over-investigation. 3 items quantify 'avoidance' behaviour, which includes not taking on complicated patients and avoiding certain procedures or more difficult cases. We confirm this factor structure in eMethods in the Supplement. Consistent with previous work, we defined elevated hedging behaviour as a score of 13 or more (possible score range from 0-36), and elevated avoidance behaviour as a score of 5 or more (possible score range from 0-12).<sup>(40)</sup> We defined any DMP as having elevated levels of avoidance and/or hedging.

### **Doctor Wellbeing**

Doctors were asked to self-report on the presence or absence (yes or no) of a variety of common medical symptoms and conditions including, cardiovascular problems, gastrointestinal problems, headaches, minor colds, recurring respiratory infections, depression, anxiety, anger and irritability, suicidal thoughts, sleep problems, relationship problems, and alcohol/drug misuse.

### **Statistical Analyses**

Spearman correlations between the MBI and DMP subscales and DMP were calculated. In order to investigate the association between burnout, DMP, and wellbeing, we calculated odds ratios based on univariable logistic regression with Firth bias correction.

Multivariable logistic regression with Firth bias correction was used to investigate the association between demographic variables and burnout, with results reported as adjusted

1  
2  
3 odds ratios and visualised with a nomogram. The predictors of burnout in this analysis were  
4  
5 age, gender, ethnicity, grade, having children, current relationship, medical degree (MD)  
6  
7 origin (UK or Ireland vs. other), and work status (full time vs. less than full time). A similar  
8  
9 multivariable analysis was performed with DMP as the dependent variable. For this model,  
10  
11 the same predictors were used, with burnout added as an additional predictor.  
12  
13

14 For the logistic regression analyses, missing values were singly imputed using the method of  
15  
16 fully conditional specification based on the abovementioned list of predictors, the MBI  
17  
18 subscales (as numerical scores), and the DMP subscales (as numerical scores).  
19  
20

21 R version 3.5.0 was used for the statistical analysis.  
22  
23

## 24 25 **Patient and Public Involvement**

26  
27 This research was designed and conducted without patient and public involvement.  
28  
29

## 30 31 **Results**

### 32 33 **Respondent Characteristics**

34  
35 The survey was sent to a total of 5661 doctors. The overall response rate was 54.8%  
36  
37 (3102/5661). We received questionnaires from 1481 consultants (53% of 2786 consultants  
38  
39 contacted), 1364 trainees (57% of 2375 trainees contacted), and 257 SAS doctors (51% of  
40  
41 500 contacted). Of these, 1462 consultants, 1357 trainees, and 254 SAS doctors were  
42  
43 actively practising and included in the analysis. The mean age was 50 years for consultants,  
44  
45 33 years for trainees, and 47 years for SAS doctors (Table 1). A majority of doctors were  
46  
47 female (58% of the consultants, 80% of the trainees, 68% of the SAS doctors). Consultants  
48  
49 (57%) and trainees (64%) were predominantly white, whereas SAS doctors were most often  
50  
51 of Asian ethnicity (42%). Descriptive statistics by demographic variables are presented in  
52  
53 Table 2. Information on missing data is presented in eTable 1 in the Supplement.  
54  
55  
56  
57  
58  
59  
60

1  
2  
3 We were unable to reliably check if our sample for all doctors was representative of the  
4  
5 entire population to whom the study survey was sent with regards to age, gender and  
6  
7 ethnicity as the RCOG do not hold a centralised database of these variables for all doctors  
8  
9 against which to compare our data. However, the RCOG sent a different survey (Training  
10  
11 Evaluation Form (TEF)) to 1956 trainees in January 2018, which was responded to by 1754  
12  
13 trainees (89.7%) (eTable 2 in the Supplement).<sup>(50)</sup> When comparing our data to this survey,  
14  
15 we found that our trainee sample was comparable in terms of gender (79.1% females in the  
16  
17 TEF database compared to 79.8% in our cohort). Furthermore our study population had  
18  
19 similar numbers of trainees in the 20-29 and 30-39 age ranges (28.3% and 62.3%  
20  
21 respectively in the TEF database compared to 24.8% and 66.1% respectively in our  
22  
23 database). Our trainee cohort consisted of more doctors in the 40-59 age range (9.1%  
24  
25 compared to 6.1% in the TEF database) which may be accounted for by missing data in the  
26  
27 TEF database. In terms of ethnicity, our sample was also comparable for all groups.  
28  
29  
30  
31  
32  
33  
34

### 35 **Burnout**

36  
37 Regarding the MBI, the percentage of participants meeting the criteria for burnout was 36%  
38  
39 overall (1116/3073); 31% for consultants (460/1462), 43% for trainees (580/1364), and 30%  
40  
41 for SAS doctors (76/254) (Table 1 and eFigure 1 in the Supplement). Between 26% and 32%  
42  
43 met the criteria for high EE, between 12% and 29% met the criteria for high DP, and  
44  
45 between 26% and 39% met the criteria for low PA. The EE and DP scales had a Spearman  
46  
47 correlation of 0.57, whereas both subscales correlated negatively with PA (-0.30 and -0.34,  
48  
49 respectively) (eTable 3).  
50  
51  
52  
53  
54

### 55 **Defensive Medical Practice**

56  
57 Increased DMP, according to our criteria, was observed in 13% overall (400/3073); 16% of  
58  
59 consultants (231/1462), 11% of trainees (149/1364), and 8% of SAS doctors (20/254).  
60

1  
2  
3 Between 4% and 9% met our criteria for increased avoidance, and between 4% and 11% met  
4  
5 our criteria for increased hedging. These subscales had a Spearman correlation of 0.41  
6  
7 (eTable 3 and eFigure 1 in the Supplement).  
8  
9

10  
11  
12 Of all participants who met the criteria for burnout, 23% met the criteria for increased DMP  
13  
14 (258/1116) (Table 3). Of participants who did not meet the criteria for burnout, 7% reported  
15  
16 increased DMP (142/1957). The crude odds ratio (OR) was 3.84 (95% CI 3.08 to 4.79). The  
17  
18 relationship was similar for all categories of doctors, and was observed for avoidance as well  
19  
20 as hedging behaviour (Table 3 and eTable 4 in the supplement).  
21  
22

### 23 24 25 **Doctor Wellbeing**

26  
27 Doctors with burnout had a higher prevalence of self-reported medical illness (Table 4).  
28  
29 Highest odds ratios were observed for suicidal thoughts (6.37, 95% CI 3.95 to 10.7),  
30  
31 depression (4.05, 95% CI 3.26 to 5.04), anxiety (3.59, 95% CI 3.07 to 4.21), anger/irritability  
32  
33 (3.51, 95% CI 3.00 to 4.10), sleep problems or insomnia (3.15, 95% CI 2.70 to 3.67) and  
34  
35 substance misuse (2.57, 95% CI 1.71-3.89). 13.5% (n=416) of all doctors reported depression,  
36  
37 but this was 7.4% for doctors without burnout and 24.4% for doctors with burnout.  
38  
39 Furthermore, 2.9% (n=90) of all doctors reported suicidal thoughts, 1.0% among doctors  
40  
41 without and 6.3% among doctors with burnout. The OR was lowest for cardiovascular  
42  
43 problems (1.38, 95% CI 1.07 to 1.78).  
44  
45  
46  
47  
48  
49

### 50 **Risk factors and correlates**

51  
52 Results of the multivariable models are presented in Table 5 and eFigure 2 in the  
53  
54 Supplement. Age, ethnicity, and origin of MD degree were most strongly related to burnout.  
55  
56 The older the doctor, the lower the reported level of burnout (adjusted OR per 5 years 0.92,  
57  
58 95% CI 0.87-0.98) and doctors of white and 'other' ethnicity reported higher levels of  
59  
60



1  
2  
3 burnout (41% and 48% respectively) than doctors of other ethnicities (28 to 34%). Doctors  
4  
5 with a medical degree from the UK or Ireland also reported higher levels of burnout (42% vs  
6  
7 25%, adjusted OR 1.74, 95% CI 1.41 to 2.16).  
8  
9

10  
11  
12 Regarding any DMP, burnout was the strongest predictor, followed by age, type of doctor,  
13  
14 and ethnicity. The adjusted OR of burnout to predict increased DMP was 4.35 (95% CI 3.46  
15  
16 to 5.49). Consultants, doctors of mixed ethnicity, and to a lesser extent older doctors,  
17  
18 reported the highest levels of DMP.  
19  
20

## 21 22 23 **Discussion**

24  
25 In this large nationwide study, we have shown that just under half of trainees and a third of  
26  
27 consultants and SAS doctors working in obstetrics and gynaecology in the UK suffer from  
28  
29 burnout using the MBI scoring system. Furthermore, our data suggest that burnout is  
30  
31 associated with higher levels of defensive medical practice, and with poorer mental and  
32  
33 physical wellbeing.  
34  
35

36  
37  
38  
39 The overall prevalence of burnout in this study is consistent with smaller international  
40  
41 studies conducted within obstetrics and gynaecology (28, 29, 51) but lower than reported in  
42  
43 the United States. (2, 52, 53) This may be explained by differences in the way burnout has  
44  
45 been measured, the small number of subjects included in some studies, differences in  
46  
47 healthcare systems as well as medical training, and the hours of work in the UK which are  
48  
49 restricted by the European Working Time Directive. A lack of personal accomplishment and  
50  
51 emotional exhaustion were the most commonly endorsed subscales, followed by  
52  
53 depersonalisation. The particularly high levels of burnout amongst younger doctors, of  
54  
55 whom the majority are trainees, may provide insights into a recent RCOG national training  
56  
57 and workforce report.(54) In this, nine out of ten O&G trainees reported feeling low in  
58  
59  
60

1  
2  
3 mood, depressed or anxious since starting specialty training(54). In keeping with this finding,  
4 and with a number of American studies,(48, 55) our data indicates that burnout is associated  
5  
6 with a negative impact on doctor wellbeing and is strongly associated with depression,  
7  
8 anxiety and suicidal thoughts.  
9  
10

11  
12  
13  
14 Our study reported a particularly strong relationship between burnout and suicidal  
15  
16 thoughts; worryingly, suicidal ideation has been shown to be strongly associated with actual  
17  
18 suicide attempts and death (56). Furthermore, suicide rates in doctors are known to be  
19  
20 much higher than for the general population(57). A study of surgeons in the USA (58) found  
21  
22 the prevalence of suicidal ideation in this group to be 6.3%; although this is higher than the  
23  
24 prevalence in this study (2.9%), we found the association between burnout and suicidal  
25  
26 ideation to be higher (odds ratio, 6.37 versus 1.910 (58)) in our cohort. This may reflect a  
27  
28 vulnerability amongst doctors working in O&G compared to other specialties(28, 29) or the  
29  
30 differences in healthcare services and culture internationally.  
31  
32  
33  
34  
35  
36

37 Studies in the USA have indicated an association between burnout and increased workforce  
38  
39 turnover(59) which has both financial implications and an impact on healthcare organisation  
40  
41 productivity. The RCOG national workforce report(54) has reported that three quarters of  
42  
43 trainees have considered leaving O&G practice. In our study, as well as the highest  
44  
45 prevalence of burnout amongst trainees, almost a fifth of trainees reported depression and  
46  
47 over a third reported anxiety. These symptoms were markedly more prevalent in the cohort  
48  
49 with burnout and depression has been shown to be independently associated with an  
50  
51 increased self-reported likelihood of leaving practice amongst surgeons.(60) Better  
52  
53 understanding the relationship between burnout, wellbeing and staff turnover intentions is  
54  
55 of great importance to ensure retention of the workforce going forward. This knowledge will  
56  
57 also help to inform the content of interventions aimed at identifying and preventing  
58  
59  
60

1  
2  
3 burnout, and improving the wellbeing and retention of doctors early in their careers (61).  
4  
5 The majority of interventions proposed to date have been individual-focused strategies  
6  
7 which include mindfulness(62), personal coping strategies and exercise (63), or some  
8  
9 combination of these. However, a recent meta-analysis of interventions to reduce doctor  
10  
11 burnout found that organisation-directed interventions (such as reducing workload,  
12  
13 changing rota/shift patterns, or group sessions to enhance teamwork) had a more significant  
14  
15 effect on reducing burnout than individual approaches alone(23). This highlights the  
16  
17 importance of implementing organisational strategies(64, 65) along with continual  
18  
19 assessment of burnout, to develop a healthy workplace environment to effectively tackle  
20  
21 this problem(5).  
22  
23  
24  
25  
26  
27

28 Our finding that burnout is associated with increased DMP supports the concern that doctor  
29  
30 burnout impacts the quality of patient care.(34) In 2010, Shanafelt et al. al(19) showed that  
31  
32 burnout is an independent predictor of self-reported perceived major medical errors. Our  
33  
34 study shows that consultants with burnout are three times more likely to report both  
35  
36 avoidance (avoiding cases or procedures) and hedging (overprescribing or over-referral)  
37  
38 which may have significant and serious consequences on patient care. This may be because  
39  
40 consultants are less 'protected' than trainees in terms of litigation as they take ultimate  
41  
42 responsibility for a patient's care. Furthermore, due to their seniority, they are likely to have  
43  
44 experienced more complaints or adverse events during their careers, which have been  
45  
46 shown to be associated with DMP(42). The observation in our study that age is inversely  
47  
48 associated with burnout is also in keeping with other studies.(66) This may be explained by  
49  
50 the fact that doctors who remain within the specialty are inherently more resilient, and that  
51  
52 those more affected by burnout may be accounted for in the attrition rate from the  
53  
54 specialty(67). It has also been suggested that the lower rate of burnout seen in more senior  
55  
56 doctors is because they may have a better work-life balance and career (67, 68). A further  
57  
58  
59  
60

1  
2  
3 noteworthy association in our cohort was that after controlling for other confounding  
4 variables, doctors from ethnic minorities were less likely to experience burnout. Similar  
5 findings have been reported in studies of trainees and medical students in the USA(69-71)  
6 however the reasons for this are unknown. It has been proposed that that these differences  
7 may be explained by differences in upbringing and life stressors, which may make doctors  
8 from ethnic minorities more resilient(69). Consistent with this, we found that doctors who  
9 graduated in the UK or Ireland are almost twice as likely to experience burnout.

10  
11  
12  
13  
14  
15  
16  
17  
18  
19  
20  
21 Strengths and weaknesses of our study are important to consider in contrast with other  
22 research on the prevalence of burnout in doctors. A strength of the study is that it is a  
23 nationwide survey which includes a large number of doctors and is the first study to our  
24 knowledge that seeks to explore the relationship between burnout (using a validated tool,  
25 the MBI) and defensive medical practice. There were several limitations to the present  
26 study. Firstly, although the overall response rate was only 54.8% which is a relatively high  
27 response rate for a survey study of this type, it still introduces the possibility of selection  
28 bias, which must be considered when interpreting the findings. We believe however that the  
29 response rate quoted is the minimum rate and is likely to under-report the response rate  
30 from practising clinicians (eDiscussion in the Supplement). Secondly, it is plausible that  
31 individuals most affected by burnout may have avoided engaging with the survey and  
32 conversely those least impacted may not have seen its value which could bias the results.  
33  
34  
35  
36  
37  
38  
39  
40  
41  
42  
43  
44  
45  
46  
47  
48 Thirdly, we asked doctors to self-report on medical conditions including depression and  
49 anxiety and the questionnaire used to assess DMP, although used in previous studies (40-  
50 42), has not been formally validated. Finally, a limitation of a cross-sectional survey study is  
51 that it cannot take into account variability of symptoms over time, which may be influenced  
52 by other factors such as time of the year and other personal factors.  
53  
54  
55  
56  
57  
58  
59  
60

## Conclusions

Our nationwide study reports high levels of burnout amongst obstetricians and gynaecologists in the UK, and that burnout is more prevalent in younger doctors who have trained in the UK. Furthermore, our data suggest that burnout is strongly associated with anxiety, depression, suicidal thoughts and substance misuse. This highlights the impact of burnout on the efficiency and sustainability of the O&G medical workforce, which confirms the need to regularly assess and mitigate burnout in doctors. We have also observed an association between burnout and defensive medical practice, which has implications for the quality and safety of patient care being delivered as well as the wellbeing and retention of staff in the NHS. Ultimately, cultivating a greater understanding of doctor burnout and its implications has strategic importance for the sustainability of the NHS workforce and will add to the body of evidence required to improve productivity and patient safety outcomes more broadly across the UK.

## Footnotes

**Author Contributions:** TB had full access to all of the data in the study and takes responsibility for the integrity of the data and the accuracy of the data analysis.

Concept and design: TB, CL, AW, LR

Acquisition, analysis, and interpretation of data: TB, HS, NF, DT, CL, AW, MAL, LR, BVC

Drafting of the manuscript: TB, HS, BVC

Critical revision of the manuscript for important intellectual content: TB, HS, NF, DT, CL, AW, MAL, LR, BVC

Statistical analysis: NF, BVC

Obtained funding: TB

TB is the guarantor and attests that all listed authors meet authorship criteria and that no others meeting the criteria have been omitted.

**Acknowledgements:** Victoria Bytel contributed to conduct of the study and facilitated data collection.

**Funding:** The Royal College of Obstetricians and Gynaecologists supported the costs of using the Maslach Burnout Inventory. The study received no additional funding. The funders had no role in the study design; collection, management, analysis, and interpretation of the data; preparation, writing, review, or approval of the manuscript; and decision to submit the manuscript for publication. All authors had full access to all of the data in the study, can take responsibility for the integrity of the data, and had final responsibility for the decision to submit for publication.

**Competing interests:** All authors have completed the ICMJE uniform disclosure form at [www.icmje.org/coi\\_disclosure.pdf](http://www.icmje.org/coi_disclosure.pdf) and declare: no support from any organisation for the

1  
2  
3 submitted work; no financial relationships with any organisations that might have an  
4  
5 interest in the submitted work in the previous three years; no other relationships or  
6  
7 activities that could appear to have influenced the submitted work.  
8  
9

10  
11  
12 **Ethical Approval:** The survey was sent to doctors registered with the Royal College of  
13  
14 Obstetricians and Gynaecologists via their email database. The Chair of the RCOG Ethics  
15  
16 Committee (Vivienne Nathanson) reviewed the study proposal and confirmed that ethical  
17  
18 approval was not required. This was due to the fact that the data collected about doctors  
19  
20 was via an encrypted online questionnaire and participants were informed that their  
21  
22 participation was voluntary and that responses would be both anonymous and untraceable.  
23  
24 Informed consent was implied on return of the survey.  
25  
26  
27  
28  
29

30  
31 **Exclusive Licence:** The Corresponding Author has the right to grant on behalf of all authors  
32  
33 and does grant on behalf of all authors, an exclusive licence on a worldwide basis to the BMJ  
34  
35 Publishing Group Ltd to permit this article (if accepted) to be published in BMJ editions and  
36  
37 any other BMJ PGL products and sublicences such use and exploit all subsidiary rights, as set  
38  
39 out in our licence.  
40  
41  
42

43  
44 **Transparency:** The lead author (TB) affirms that the manuscript is an honest, accurate, and  
45  
46 transparent account of the study being reported; that no important aspects of the study  
47  
48 have been omitted; and any discrepancies from the study as planned have been explained.  
49  
50  
51

52  
53 **Data sharing statement:** No additional data is available at present. Any queries to be  
54  
55 submitted to the corresponding author at [t.bourne@imperial.ac.uk](mailto:t.bourne@imperial.ac.uk).  
56  
57  
58  
59  
60

1  
2  
3  
4  
5  
6  
7  
8  
9  
10  
11  
12  
13  
14  
15  
16  
17  
18  
19  
20  
21  
22  
23  
24  
25  
26  
27  
28  
29  
30  
31  
32  
33  
34  
35  
36  
37  
38  
39  
40  
41  
42  
43  
44  
45  
46  
47  
48  
49  
50  
51  
52  
53  
54  
55  
56  
57  
58  
59  
60

For peer review only



## References

1. Arigoni F, Bovier PA, Sappino A-P. Trend of burnout among Swiss doctors. *Swiss Med Wkly*. 2010;140:w13070.
2. Gabbe SG, Melville J, Mandel L, Walker E. Burnout in chairs of obstetrics and gynecology: diagnosis, treatment, and prevention. *Am J Obstet Gynecol*. 2002;186(4):601-12.
3. Wang Z, Xie Z, Dai J, Zhang L, Huang Y, Chen B. Physician burnout and its associated factors: a cross-sectional study in Shanghai. *J Occup Health*. 2014;56(1):73-83.
4. Klein J, Grosse Frie K, Blum K, von dem Knesebeck O. Burnout and perceived quality of care among German clinicians in surgery. *Int J Qual Health Care*. 2010;22(6):525-30.
5. Montgomery A, Panagopoulou E, Esmail A, Richards T, Maslach C. Burnout in healthcare: the case for organisational change. *BMJ*. 2019;366:l4774.
6. Johnson J, Bu C, Panagioti M. Tackling burnout in UK trainee doctors is vital for a sustainable, safe, high quality NHS. *BMJ*. 2018;362:k3705.
7. Shanafelt TD, Hasan O, Dyrbye LN, Sinsky C, Satele D, Sloan J, et al. Changes in Burnout and Satisfaction With Work-Life Balance in Physicians and the General US Working Population Between 2011 and 2014. *Mayo Clin Proc*. 2015;90(12):1600-13.
8. Maslach C, Schaufeli WB, Leiter MP. Job burnout. *Annu Rev Psychol*. 2001;52:397-422.
9. GMC. General Medical Council. National training surveys 2018: initial findings report. <https://www.gmc-uk.org/about/what-we-do-and-why/data-and-research/national-training-surveys-reports>. 2018.
10. Rotenstein LS, Torre M, Ramos MA, Rosales RC, Guille C, Sen S, et al. Prevalence of Burnout Among Physicians: A Systematic Review. *JAMA*. 2018;320(11):1131-50.
11. Wurm W, Vogel K, Holl A, Ebner C, Bayer D, Morkl S, et al. Depression-Burnout Overlap in Physicians. *PloS one*. 2016;11(3):e0149913.
12. Vandebroek S, Van Gerven E, De Witte H, Vanhaecht K, Godderis L. Burnout in Belgian physicians and nurses. *Occup Med (Lond)*. 2017;67(7):546-54.
13. Pedersen AF, Sorensen JK, Bruun NH, Christensen B, Vedsted P. Risky alcohol use in Danish physicians: Associated with alexithymia and burnout? *Drug Alcohol Depend*. 2016;160:119-26.
14. Pantenburg B, Lupp M, Konig HH, Riedel-Heller SG. Burnout among young physicians and its association with physicians' wishes to leave: results of a survey in Saxony, Germany. *J Occup Med Toxicol*. 2016;11:2.
15. Ruitenburg MM, Frings-Dresen MH, Sluiter JK. The prevalence of common mental disorders among hospital physicians and their association with self-reported work ability: a cross-sectional study. *BMC Health Serv Res*. 2012;12:292-8.

16. Baas MAM, Scheepstra KWF, Stramrood CAI, Evers R, Dijkman LM, van Pampus MG. Work-related adverse events leaving their mark: a cross-sectional study among Dutch gynecologists. *BMC Psychiatry*. 2018;18(1):73.
17. Li H, Zuo M, Gelb AW, Zhang B, Zhao X, Yao D, et al. Chinese Anesthesiologists Have High Burnout and Low Job Satisfaction: A Cross-Sectional Survey. *Anesth Analg*. 2018;126(3):1004-12.
18. Wu H, Liu L, Wang Y, Gao F, Zhao X, Wang L. Factors associated with burnout among Chinese hospital doctors: a cross-sectional study. *BMC Public Health*. 2013;13:786.
19. Shanafelt TD, Balch CM, Bechamps G, Russell T, Dyrbye L, Satele D, et al. Burnout and medical errors among American surgeons. *Ann Surg*. 2010;251(6):995-1000.
20. Shanafelt TD, Gradishar WJ, Kosty M, Satele D, Chew H, Horn L, et al. Burnout and career satisfaction among US oncologists. *J Clin Oncol*. 2014;32(7):678-86.
21. Dewa CS, Loong D, Bonato S, Trojanowski L. The relationship between physician burnout and quality of healthcare in terms of safety and acceptability: a systematic review. *BMJ Open*. 2017;7(6):e015141.
22. Hall LH, Johnson J, Watt I, Tsipa A, O'Connor DB. Healthcare staff wellbeing, burnout, and patient safety: A systematic review. *PLoS One*. 2016;11(7):e0159015.
23. Panagioti M, Panagopoulou E, Bower P, Lewith G, Kontopantelis E, Chew-Graham C, et al. Controlled Interventions to Reduce Burnout in Physicians: A Systematic Review and Meta-analysis. *JAMA Intern Med*. 2017;177(2):195-205.
24. Salyers MP, Bonfils KA, Luther L, Firmin RL, White DA, Adams EL, et al. The Relationship Between Professional Burnout and Quality and Safety in Healthcare: A Meta-Analysis. *J Gen Intern Med*. 2016:1-8.
25. Hall LH, Johnson J, Heyhoe J, Watt I, Anderson K, O'Connor DB. Exploring the impact of primary care physician burnout and wellbeing on patient care: A focus group study [published online ahead of print (Nov 17)]. *J Patient Saf*. 2017.
26. Rimmer A. Employers must tackle high level of burnout among trainees, says GMC. *BMJ*. 2018;362:k3018.
27. Imo UO. Burnout and psychiatric morbidity among doctors in the UK: a systematic literature review of prevalence and associated factors. *BJPsych Bull*. 2017;41(4):197-204.
28. Castelo-Branco C, Figueras F, Eixarch E, Quereda F, Cancelo MJ, Gonzalez S, et al. Stress symptoms and burnout in obstetric and gynaecology residents. *BJOG*. 2007;114(1):94-8.
29. Moradi Y, Baradaran HR, Yazdandoost M, Atrak S, Kashanian M. Prevalence of Burnout in residents of obstetrics and gynecology: A systematic review and meta-analysis. *Med J Islam Repub Iran*. 2015;29(4):235-.
30. Dyrbye LN, Burke SE, Hardeman RR, et al. Association of clinical specialty with symptoms of burnout and career choice regret among us resident physicians. *JAMA*. 2018;320(11):1114-30.

- 1  
2  
3 31. Iorga M, Socolov V, Muraru D, Dirtu C, Soponaru C, Ilea C, et al. Factors Influencing  
4 Burnout Syndrome in Obstetrics and Gynecology Physicians. *Biomed Res Int*.  
5 2017;2017:9318534.  
6
- 7 32. Shanafelt T, Goh J, Sinsky C. The Business Case for Investing in Physician Well-being.  
8 *JAMA Intern Med*. 2017;177(12):1826-32.  
9
- 10 33. Landon BE, Reschovsky JD, Pham HH, Blumenthal D. Leaving medicine: the  
11 consequences of physician dissatisfaction. *Med Care*. 2006;44(3):234-42.  
12
- 13 34. Panagioti M, Geraghty K, Johnson J, Zhou A, Panagopoulou E, Chew-Graham C, et al.  
14 Association Between Physician Burnout and Patient Safety, Professionalism, and Patient  
15 Satisfaction: A Systematic Review and Meta-analysis. *JAMA Intern Med*. 2018;178(10):1317-  
16 30.  
17
- 18 35. Studdert DM, Mello MM, Sage WM, DesRoches CM, Peugh J, Zapert K, et al.  
19 Defensive medicine among high-risk specialist physicians in a volatile malpractice  
20 environment. *JAMA*. 2005;293(21):2609-17.  
21
- 22 36. NHS. NHS Resolution. Annual report and accounts 2017/2018.  
23 <https://resolution.nhs.uk/annual-report-and-accounts/>. 2018.  
24
- 25 37. Xu X, Siefert KA, Jacobson PD, Lori JR, Ransom SB. The effects of medical liability on  
26 obstetric care supply in Michigan. *Am J Obstet Gynecol*. 2008;198(2):205.e1-9.  
27
- 28 38. Barbieri RL. Professional liability payments in obstetrics and gynecology. *Obstet*  
29 *Gynecol*. 2006;107(3):578-81.  
30
- 31 39. Zwecker P, Azoulay L, Abenhaim HA. Effect of fear of litigation on obstetric care: a  
32 nationwide analysis on obstetric practice. *Am J Perinatol*. 2011;28(4):277-84.  
33
- 34 40. Bourne T, Wynants L, Peters M, Van Audenhove C, Timmerman D, Van Calster B, et  
35 al. The impact of complaints procedures on the welfare, health and clinical practise of 7926  
36 doctors in the UK: a cross-sectional survey. *BMJ Open*. 2015;5(1):e006687.  
37
- 38 41. Bourne T, Vanderhaegen J, Vranken R, Wynants L, De Cock B, Peters M, et al.  
39 Doctors' experiences and their perception of the most stressful aspects of complaints  
40 processes in the UK: an analysis of qualitative survey data. *BMJ Open*. 2016;6(7):e011711.  
41
- 42 42. Bourne T, De Cock B, Wynants L, Peters M, Van Audenhove C, Timmerman D, et al.  
43 Doctors' perception of support and the processes involved in complaints investigations and  
44 how these relate to welfare and defensive practice: a cross-sectional survey of the UK  
45 physicians. *BMJ Open*. 2017;7(11):e017856.  
46
- 47 43. Ortashi O, Virdee J, Hassan R, Mutrynowski T, Abu-Zidan F. The practice of defensive  
48 medicine among hospital doctors in the United Kingdom. *BMC Med Ethics*. 2013;14:42.  
49
- 50 44. Mello MM, Chandra A, Gawande AA, Studdert DM. National costs of the medical  
51 liability system. *Health Aff (Millwood)*. 2010;29(9):1569-77.  
52
- 53 45. NHS. The Maternal and Neonatal Health Safety Collaborative.  
54 <https://improvement.nhs.uk/resources/maternal-and-neonatal-safety-collaborative/>. 2017.  
55  
56  
57  
58  
59  
60

- 1  
2  
3 46. NHSE. National Maternity Review. Better Births: Improving outcomes of maternity  
4 services in England. 2016 March 2018. Available from: [https://www.england.nhs.uk/mat-  
6 transformation/implementing-better-births/mat-review/](https://www.england.nhs.uk/mat-<br/>5 transformation/implementing-better-births/mat-review/).
- 7  
8 47. Statistics OfN. Ethnic group, national identity and religion 2010 [Available from:  
9 [https://www.ons.gov.uk/methodology/classificationsandstandards/measuringequality/ethni-  
11 cgroupnationalidentityandreligion#ethnic-group](https://www.ons.gov.uk/methodology/classificationsandstandards/measuringequality/ethni-<br/>10 cgroupnationalidentityandreligion#ethnic-group).
- 12 48. West CP, Dyrbye LN, Shanafelt TD. Physician burnout: contributors, consequences  
13 and solutions. *J Intern Med*. 2018;283(6):516-29.
- 14  
15 49. Maslach C, Jackson SE. The measurement of experienced burnout. *J Organ Behav*.  
16 1981;2(2):99-113.
- 17  
18 50. RCOG. Training Evaluation Form Results London, UK: Royal College of Obstetricians  
19 and Gynaecologists; 2018 [Available from: [https://www.rcog.org.uk/en/careers-  
22 training/about-specialty-training-in-og/assessment-and-progression-through-  
23 training/training-evaluation-form-tef/](https://www.rcog.org.uk/en/careers-<br/>20 training/about-specialty-training-in-og/assessment-and-progression-through-<br/>21 training/training-evaluation-form-tef/).
- 24 51. Ye J, Wang H, Wu H, Ye L, Li Q, Ma XY, et al. Burnout among obstetricians and  
25 paediatricians: a cross-sectional study from China. *BMJ Open*. 2019;9(1):e024205.
- 26  
27 52. Martini S, Arfken CL, Churchill A, Balon R. Burnout comparison among residents in  
28 different medical specialties. *Academic psychiatry : the journal of the American Association  
29 of Directors of Psychiatric Residency Training and the Association for Academic Psychiatry*.  
30 2004;28(3):240-2.
- 31  
32 53. Shanafelt TD, Boone S, Tan L, Dyrbye LN, Sotile W, Satele D, et al. Burnout and  
33 satisfaction with work-life balance among US physicians relative to the general US  
34 population. *Arch Intern Med*. 2012;172(18):1377-85.
- 35  
36 54. RCOG. O&G Workforce Report London, UK: Royal College of Obstetricians and  
37 Gynaecologists; 2017 [Available from: <https://www.rcog.org.uk/workforce2017>.
- 38  
39 55. Tawfik DS, Profit J, Morgenthaler TI, Satele DV, Sinsky CA, Dyrbye LN, et al. Physician  
40 Burnout, Well-being, and Work Unit Safety Grades in Relationship to Reported Medical  
41 Errors. *Mayo Clin Proc*. 2018.
- 42  
43 56. Chu C, Buchman-Schmitt JM, Stanley IH, Hom MA, Tucker RP, Hagan CR, et al. The  
44 interpersonal theory of suicide: A systematic review and meta-analysis of a decade of cross-  
45 national research. *Psychol Bull*. 2017;143(12):1313-45.
- 46  
47 57. Schernhammer ES, Colditz GA. Suicide rates among physicians: a quantitative and  
48 gender assessment (meta-analysis). *Am J Psychiatry*. 2004;161(12):2295-302.
- 49  
50 58. Shanafelt TD, Balch CM, Dyrbye L, Bechamps G, Russell T, Satele D, et al. Special  
51 report: suicidal ideation among American surgeons. *Arch Surg*. 2011;146(1):54-62.
- 52  
53 59. Dyrbye LN, Shanafelt TD. Physician burnout: a potential threat to successful health  
54 care reform. *JAMA*. 2011;305(19):2009-10.
- 55  
56 60. Shanafelt T, Sloan J, Satele D, Balch C. Why do surgeons consider leaving practice? *J*  
57 *Am Coll Surg*. 2011;212(3):421-2.

- 1  
2  
3 61. Panagioti M, Geraghty K, Johnson J. How to prevent burnout in cardiologists? A  
4 review of the current evidence, gaps, and future directions. *Trends Cardiovasc Med*.  
5 2018;28(1):1-7.  
6  
7 62. Goodman MJ, Schorling JB. A mindfulness course decreases burnout and improves  
8 well-being among healthcare providers. *Int J Psychiatry Med*. 2012;43(2):119-28.  
9  
10 63. Babbar S, Renner K, Williams K. Addressing Obstetrics and Gynecology Trainee  
11 Burnout Using a Yoga-Based Wellness Initiative During Dedicated Education Time. *Obstet*  
12 *Gynecol*. 2019;133(5):994-1001.  
13  
14 64. Shanafelt TD, Noseworthy JH. Executive Leadership and Physician Well-being: Nine  
15 Organizational Strategies to Promote Engagement and Reduce Burnout. *Mayo Clin Proc*.  
16 2017;92(1):129-46.  
17  
18 65. West CP, Dyrbye LN, Erwin PJ, Shanafelt TD. Interventions to prevent and reduce  
19 physician burnout: a systematic review and meta-analysis. *Lancet (London, England)*.  
20 2016;388(10057):2272-81.  
21  
22 66. Shanafelt TD, Balch CM, Bechamps GJ, Russell T, Dyrbye L, Satele D, et al. Burnout  
23 and career satisfaction among American surgeons. *Ann Surg*. 2009;250(3):463-71.  
24  
25 67. Levin KH, Shanafelt TD, Keran CM, Busis NA, Foster LA, Molano JRV, et al. Burnout,  
26 career satisfaction, and well-being among US neurology residents and fellows in 2016.  
27 *Neurology*. 2017;89(5):492-501.  
28  
29 68. Amofo E, Hanbali N, Patel A, Singh P. What are the significant factors associated  
30 with burnout in doctors? *Occup Med (Lond)*. 2015;65(2):117-21.  
31  
32 69. Dyrbye LN, Thomas MR, Eacker A, Harper W, Massie FS, Jr., Power DV, et al. Race,  
33 ethnicity, and medical student well-being in the United States. *Arch Intern Med*.  
34 2007;167(19):2103-9.  
35  
36 70. Dyrbye L, Shanafelt T. A narrative review on burnout experienced by medical  
37 students and residents. *Med Educ*. 2016;50(1):132-49.  
38  
39 71. West CP, Shanafelt TD, Kolars JC. Quality of life, burnout, educational debt, and  
40 medical knowledge among internal medicine residents. *JAMA*. 2011;306(9):952-60.  
41  
42  
43  
44  
45  
46  
47  
48  
49  
50  
51  
52  
53  
54  
55  
56  
57  
58  
59  
60

## Tables

Table 1. Descriptive statistics by doctor category.

|                                                   | <b>Consultants<br/>N=1481</b> | <b>SAS<sup>a</sup><br/>N=257</b> | <b>Trainees<br/>N=1364</b> |
|---------------------------------------------------|-------------------------------|----------------------------------|----------------------------|
| Actively practising                               | 1462 (99%)                    | 254 (99%)                        | 1357 (99%)                 |
| <i>If actively practising<sup>b</sup>:</i>        |                               |                                  |                            |
| Age, mean (range)                                 | 50 (33-73)                    | 47 (27-74)                       | 33 (25-58)                 |
| Female                                            | 831 (58%)                     | 171 (68%)                        | 1067 (80%)                 |
| Ethnicity                                         |                               |                                  |                            |
| White                                             | 831 (57%)                     | 79 (31%)                         | 857 (64%)                  |
| Asian                                             | 438 (30%)                     | 106 (42%)                        | 288 (21%)                  |
| Black                                             | 88 (6%)                       | 23 (9%)                          | 90 (7%)                    |
| Mixed                                             | 58 (4%)                       | 26 (10%)                         | 88 (7%)                    |
| Other                                             | 37 (3%)                       | 19 (8%)                          | 26 (2%)                    |
| Children                                          | 1267 (87%)                    | 198 (78%)                        | 585 (43%)                  |
| Relationship                                      | 1269 (87%)                    | 216 (85%)                        | 979 (72%)                  |
| Qualified in UK/Ireland                           | 865 (59%)                     | 42 (17%)                         | 1089 (80%)                 |
| Full time                                         | 1276 (87%)                    | 211 (83%)                        | 1064 (79%)                 |
| Subspecialty (consultants)                        |                               |                                  |                            |
| None                                              | 1278 (87%)                    | N/A                              | N/A                        |
| Maternal/Fetal medicine                           | 56 (4%)                       | N/A                              | N/A                        |
| Sexual/reproductive health                        | 34 (2%)                       | N/A                              | N/A                        |
| Gynaecological oncology                           | 33 (2%)                       | N/A                              | N/A                        |
| Reproductive medicine                             | 33 (2%)                       | N/A                              | N/A                        |
| Urogynaecology                                    | 28 (2%)                       | N/A                              | N/A                        |
| <b>Maslach Burnout Inventory</b>                  |                               |                                  |                            |
| <b>Emotional exhaustion</b>                       |                               |                                  |                            |
| Mean                                              | 19.9 (0-54)                   | 18.7 (0-53)                      | 21.9 (0-54)                |
| High <sup>c</sup> (%)                             | 411 (28%)                     | 65 (26%)                         | 440 (32%)                  |
| <b>Depersonalisation</b>                          |                               |                                  |                            |
| Mean                                              | 4.5 (0-29)                    | 4.5 (0-30)                       | 7.0 (0-29)                 |
| High <sup>d</sup> (%)                             | 178 (12%)                     | 33 (13%)                         | 394 (29%)                  |
| <b>Personal accomplishment</b>                    |                               |                                  |                            |
| Mean                                              | 37.2 (0-48)                   | 35.3 (4-48)                      | 34.6 (0-48)                |
| Low <sup>e</sup> (%)                              | 382 (26%)                     | 95 (37%)                         | 530 (39%)                  |
| <b>Burnout<sup>f</sup></b>                        | 460 (31%)                     | 76 (30%)                         | 580 (43%)                  |
| <b>Defensive medical practice</b>                 |                               |                                  |                            |
| <b>Avoidance</b>                                  |                               |                                  |                            |
| Mean                                              | 1.4 (0-12)                    | 1.1 (0-12)                       | 0.9 (0-10)                 |
| Elevated <sup>g</sup> (%)                         | 125 (9%)                      | 13 (5%)                          | 58 (4%)                    |
| <b>Hedging</b>                                    |                               |                                  |                            |
| Mean                                              | 5.2 (0-36)                    | 2.8 (0-36)                       | 4.6 (0-36)                 |
| Elevated <sup>h</sup> (%)                         | 164 (11%)                     | 11 (4%)                          | 114 (8%)                   |
| <b>Any defensive medical practice<sup>i</sup></b> | 231 (16%)                     | 20 (8%)                          | 149 (11%)                  |

<sup>a</sup> SAS: Specialty and Specialty Associate Doctors

1  
2  
3 <sup>b</sup> Results for each variable are based on available data, i.e. excluding participants with a  
4 missing value. Gender has the most missing values, 41/3073 (1.3%). Missing values for all  
5 variables are reported in eTable1 in the Supplement.

6 <sup>c</sup> Scores of  $\geq 27$  (range 0-54) are considered high and indicate burnout in accordance with the  
7 Maslach Burnout Inventory

8 <sup>d</sup> Scores of  $\geq 10$  (range 0-30) are considered high and indicate burnout in accordance with the  
9 Maslach Burnout Inventory

10 <sup>e</sup> The score range is 0-48; scores  $\leq 33$  are defined as low personal accomplishment

11 <sup>f</sup> Positive for burnout if emotional exhaustion and/or depersonalisation scores high (as  
12 defined) in accordance with the Maslach Burnout Inventory

13 <sup>g</sup> Scores of  $\geq 13$  (range 0-36) are considered elevated and indicate avoidance behaviour

14 <sup>h</sup> Scores of  $\geq 5$  (range 0-12) are considered elevated and indicate hedging behaviour

15 <sup>i</sup> Defined as elevated levels of avoidance and/or hedging behaviour  
16  
17  
18  
19  
20  
21  
22  
23  
24  
25  
26  
27  
28  
29  
30  
31  
32  
33  
34  
35  
36  
37  
38  
39  
40  
41  
42  
43  
44  
45  
46  
47  
48  
49  
50  
51  
52  
53  
54  
55  
56  
57  
58  
59  
60

For peer review only

Table 2. Descriptive statistics of Burnout and Defensive Medical Practice stratified by demographic variables.

|                                   | Burnout <sup>a</sup> (%) | Avoidance <sup>b</sup> (%) | Hedging <sup>c</sup> (%) | Any DMP <sup>d,e</sup> (%) |
|-----------------------------------|--------------------------|----------------------------|--------------------------|----------------------------|
| <b>Age (years)</b>                |                          |                            |                          |                            |
| <35 (n=948)                       | 440 (46%)                | 37 (4%)                    | 93 (10%)                 | 115 (12%)                  |
| 35-49 (n=1209)                    | 395 (33%)                | 68 (6%)                    | 114 (9%)                 | 151 (12%)                  |
| ≥50 (n=916)                       | 281 (31%)                | 91 (10%)                   | 82 (9%)                  | 134 (15%)                  |
| <b>Gender</b>                     |                          |                            |                          |                            |
| Female (n=2069)                   | 763(37%)                 | 105 (5%)                   | 179 (9%)                 | 239 (12%)                  |
| Male (n=963)                      | 332 (34%)                | 87 (9%)                    | 102 (11%)                | 152 (16%)                  |
| <b>Ethnicity</b>                  |                          |                            |                          |                            |
| White (n=1767)                    | 723 (41%)                | 114 (6%)                   | 159 (9%)                 | 227 (13%)                  |
| Asian (n=832)                     | 229 (28%)                | 49 (6%)                    | 79 (9%)                  | 105 (13%)                  |
| Black (n=201)                     | 57 (28%)                 | 10 (5%)                    | 17 (8%)                  | 21 (10%)                   |
| Mixed (n=172)                     | 59 (34%)                 | 14 (8%)                    | 23 (13%)                 | 31 (18%)                   |
| Other (n=82)                      | 39 (48%)                 | 3 (4%)                     | 7 (9%)                   | 8 (10%)                    |
| <b>Children</b>                   |                          |                            |                          |                            |
| No (n=1023)                       | 473 (46%)                | 48 (5%)                    | 96 (9%)                  | 126 (12%)                  |
| Yes (n=2050)                      | 643 (31%)                | 148 (7%)                   | 193 (9%)                 | 274 (13%)                  |
| <b>Relationship</b>               |                          |                            |                          |                            |
| No (n=601)                        | 266 (44%)                | 32 (5%)                    | 51 (8%)                  | 74 (12%)                   |
| Yes (n=2464)                      | 844 (34%)                | 161 (7%)                   | 237 (10%)                | 323 (13%)                  |
| <b>Country of Qualification</b>   |                          |                            |                          |                            |
| United Kingdom/Ireland (n=1996)   | 841 (42%)                | 125 (6%)                   | 193 (10%)                | 265 (13%)                  |
| Other (n=1075)                    | 273 (25%)                | 71 (7%)                    | 96 (9%)                  | 135 (13%)                  |
| <b>Work status</b>                |                          |                            |                          |                            |
| Full Time (n= 2551)               | 952 (37%)                | 161 (6%)                   | 248 (10%)                | 341 (13%)                  |
| Less Than Full Time (n=519)       | 163 (31%)                | 35 (7%)                    | 41 (8%)                  | 59 (11%)                   |
| <b>Subspecialty (consultants)</b> |                          |                            |                          |                            |
| None (n=1278)                     | 404 (32%)                | 116 (9%)                   | 151 (12%)                | 213 (17%)                  |
| Maternal/Fetal (n=56)             | 20 (36%)                 | 3 (5%)                     | 7 (12.5%)                | 8 (14%)                    |
| Sexual/Reproductive health (n=34) | 10 (29%)                 | 0 (0%)                     | 1 (3%)                   | 1 (3%)                     |
| Gynaecological oncology (n=33)    | 8 (24%)                  | 0 (0%)                     | 1 (3%)                   | 1 (3%)                     |
| Reproductive medicine (n=33)      | 9 (27%)                  | 2 (6%)                     | 0                        | 2 (6%)                     |
| Urogynaecology (n=28)             | 9 (32%)                  | 4 (14%)                    | 4 (14%)                  | 6 (21%)                    |

<sup>a</sup> Positive for burnout if emotional exhaustion score  $\geq 27$  (range 0-54) and/or depersonalisation score  $\geq 10$  (range 0-30) in accordance with the Maslach Burnout Inventory

<sup>b</sup> Defined as avoidance score of  $\geq 13$  (range 0-36)

<sup>c</sup> Defined as hedging score of  $\geq 5$  (range 0-12)

<sup>d</sup> DMP: Defensive Medical Practice

<sup>e</sup> Defined as presence of avoidance and/or hedging (as defined)



Table 3. Descriptive statistics of defensive practice by burnout status

| Doctor category                        | Avoidance <sup>a</sup> |                     | Hedging <sup>b</sup> |                     | Any DMP <sup>c,d</sup> |
|----------------------------------------|------------------------|---------------------|----------------------|---------------------|------------------------|
|                                        | Mean score             | % Elevated          | Mean score           | % Elevated          | %                      |
| <b>Burnout status<sup>e</sup></b>      |                        |                     |                      |                     |                        |
| <b>Consultant</b>                      |                        |                     |                      |                     |                        |
| No burnout (n=1002)                    | 1.05                   | 53 (5%)             | 3.95                 | 67 (7%)             | 101 (10%)              |
| Burnout (n=460)                        | 2.14                   | 72 (16%)            | 7.79                 | 97 (21%)            | 130 (28%)              |
| <b>SAS<sup>f</sup></b>                 |                        |                     |                      |                     |                        |
| No burnout (n=178)                     | 0.72                   | 3 (2%)              | 1.74                 | 2 (1%)              | 5 (3%)                 |
| Burnout (n=76)                         | 1.92                   | 10 (13%)            | 5.34                 | 9 (12%)             | 15 (20%)               |
| <b>Trainees</b>                        |                        |                     |                      |                     |                        |
| No burnout (n=777)                     | 0.59                   | 15 (2%)             | 3.30                 | 25 (3%)             | 36 (5%)                |
| Burnout (n=580)                        | 1.38                   | 43 (7%)             | 6.46                 | 89 (15%)            | 113 (19%)              |
| <b>All doctors</b>                     |                        |                     |                      |                     |                        |
| No burnout (n=1957)                    | 0.84                   | 71 (4%)             | 3.49                 | 94 (5%)             | 142 (7%)               |
| Burnout (n=1116)                       | 1.73                   | 125 (11%)           | 6.93                 | 195 (17%)           | 258 (23%)              |
| <b>Odds ratio<sup>g</sup> (95% CI)</b> |                        | 3.34<br>(2.48-4.53) |                      | 4.18<br>(3.24-5.43) | 3.84<br>(3.08-4.79)    |

<sup>a</sup> Scores of  $\geq 13$  (range 0-36) are considered elevated and indicate avoidance behaviour

<sup>b</sup> Scores of  $\geq 5$  (range 0-12) are considered elevated and indicate hedging behaviour

<sup>c</sup> DMP: Defensive Medical Practice

<sup>d</sup> Defined as elevated levels of avoidance and/or hedging behaviour

<sup>e</sup> Burnout defined as an emotional exhaustion score  $\geq 27$  (range 0-54) and/or depersonalisation score  $\geq 10$  (range 0-30) in accordance with the Maslach Burnout Inventory

<sup>f</sup> SAS: Specialty and Specialty Associate Doctors

<sup>g</sup> Odds ratios are based on univariable logistic regression with Firth bias correction

Table 4. Descriptive statistics of self-reported wellbeing, and odds ratios (with 95% Confidence Intervals (CI)) with burnout

|                                         | All<br>(n=3073)  | Consultants<br>(n=1462) | SAS <sup>a</sup><br>(n=254) | Trainees<br>(n=1357) |
|-----------------------------------------|------------------|-------------------------|-----------------------------|----------------------|
| <b>Cardiovascular problems</b>          | 261 (8.5)        | 186 (12.7)              | 31 (12.2)                   | 44 (3.2)             |
| No burnout                              | 148 (7.6)        | 114 (11.4)              | 20 (11.2)                   | 14 (1.8)             |
| Burnout <sup>b</sup>                    | 113 (10.1)       | 72 (15.7)               | 11 (14.5)                   | 30 (5.2)             |
| Odds ratio <sup>c</sup> (95% CI)        | 1.38 (1.07-1.78) |                         |                             |                      |
| <b>Gastro-intestinal problems</b>       | 480 (15.6)       | 221 (15.1)              | 29 (11.4)                   | 230 (16.9)           |
| No burnout                              | 225 (11.5)       | 111 (11.1)              | 14 (7.9)                    | 100 (12.9)           |
| Burnout                                 | 255 (22.8)       | 110 (23.9)              | 15 (19.7)                   | 130 (22.4)           |
| Odds ratio <sup>c</sup> (95% CI)        | 2.28 (1.87-2.78) |                         |                             |                      |
| <b>Depression</b>                       | 416 (13.5)       | 141 (9.6)               | 41 (16.1)                   | 234 (17.2)           |
| No burnout                              | 144 (7.4)        | 42 (4.2)                | 21 (11.8)                   | 81 (10.4)            |
| Burnout                                 | 272 (24.4)       | 99 (21.5)               | 20 (26.3)                   | 153 (26.4)           |
| Odds ratio <sup>c</sup> (95% CI)        | 4.05 (3.26-5.04) |                         |                             |                      |
| <b>Anxiety</b>                          | 1008 (32.8)      | 416 (28.5)              | 80 (31.5)                   | 512 (37.7)           |
| No burnout                              | 439 (22.4)       | 194 (19.4)              | 43 (24.2)                   | 202 (26.0)           |
| Burnout                                 | 569 (51.0)       | 222 (48.3)              | 37 (48.7)                   | 310 (53.4)           |
| Odds ratio <sup>c</sup> (95% CI)        | 3.59 (3.07-4.21) |                         |                             |                      |
| <b>Anger-irritability</b>               | 1048 (34.1)      | 498 (34.1)              | 81 (31.9)                   | 469 (34.6)           |
| No burnout                              | 465 (23.8)       | 235 (23.5)              | 42 (23.6)                   | 188 (24.2)           |
| Burnout                                 | 583 (52.2)       | 263 (57.2)              | 39 (51.3)                   | 281 (48.4)           |
| Odds ratio <sup>c</sup> (95% CI)        | 3.51 (3.00-4.10) |                         |                             |                      |
| <b>Suicidal thoughts</b>                | 90 (2.9)         | 33 (2.3)                | 2 (0.8)                     | 55 (4.1)             |
| No burnout                              | 20 (1.0)         | 5 (0.5)                 | 0                           | 15 (1.9)             |
| Burnout                                 | 70 (6.3)         | 28 (6.1)                | 2 (2.6)                     | 40 (6.9)             |
| Odds ratio <sup>c</sup> (95% CI)        | 6.37 (3.95-10.7) |                         |                             |                      |
| <b>Sleep problems / insomnia</b>        | 1188 (38.7)      | 515 (35.2)              | 93 (36.6)                   | 580 (42.7)           |
| No burnout                              | 563 (28.8)       | 256 (25.5)              | 52 (29.2)                   | 255 (32.8)           |
| Burnout                                 | 625 (56.0)       | 259 (56.3)              | 41 (53.9)                   | 325 (56.0)           |
| Odds ratio <sup>c</sup> (95% CI)        | 3.15 (2.70-3.67) |                         |                             |                      |
| <b>Marital/relationship problems</b>    | 544 (17.7)       | 206 (14.1)              | 43 (16.9)                   | 295 (21.7)           |
| No burnout                              | 241 (12.3)       | 105 (10.5)              | 20 (11.2)                   | 116 (14.9)           |
| Burnout                                 | 303 (27.2)       | 101 (22.0)              | 23 (30.3)                   | 179 (30.9)           |
| Odds ratio <sup>c</sup> (95% CI)        | 2.65 (2.20-3.20) |                         |                             |                      |
| <b>Frequent headaches</b>               | 652 (21.2)       | 210 (14.4)              | 77 (30.3)                   | 365 (26.9)           |
| No burnout                              | 317 (16.2)       | 107 (10.7)              | 37 (20.8)                   | 173 (22.3)           |
| Burnout                                 | 335 (30.0)       | 103 (22.4)              | 40 (52.6)                   | 192 (33.1)           |
| Odds ratio <sup>c</sup> (95% CI)        | 2.22 (1.86-2.64) |                         |                             |                      |
| <b>Minor colds</b>                      | 812 (26.4)       | 268 (18.3)              | 59 (23.2)                   | 485 (35.7)           |
| No burnout                              | 449 (22.9)       | 165 (16.5)              | 42 (23.6)                   | 242 (31.1)           |
| Burnout                                 | 363 (32.5)       | 103 (22.4)              | 17 (22.4)                   | 243 (41.9)           |
| Odds ratio <sup>c</sup> (95% CI)        | 1.62 (1.37-1.91) |                         |                             |                      |
| <b>Recurrent respiratory infections</b> | 188 (6.1)        | 66 (4.5)                | 16 (6.3)                    | 106 (7.8)            |
| No burnout                              | 81 (4.1)         | 31 (3.1)                | 10 (5.6)                    | 40 (5.1)             |
| Burnout                                 | 107 (9.6)        | 35 (7.6)                | 6 (7.9)                     | 66 (11.4)            |
| Odds ratio <sup>c</sup> (95% CI)        | 2.45 (1.82-3.31) |                         |                             |                      |
| <b>Alcohol/drugs problems</b>           | 97 (3.2)         | 56 (3.8)                | 4 (1.6)                     | 37 (2.7)             |
| No burnout                              | 40 (2.0)         | 24 (2.4)                | 2 (1.1)                     | 14 (1.8)             |
| Burnout                                 | 57 (5.1)         | 32 (7.0)                | 2 (2.6)                     | 23 (4.0)             |
| Odds ratio <sup>c</sup> (95% CI)        | 2.57 (1.71-3.89) |                         |                             |                      |

1  
2  
3  
4  
5  
6  
7  
8  
9  
10  
11  
12  
13  
14  
15  
16  
17  
18  
19  
20  
21  
22  
23  
24  
25  
26  
27  
28  
29  
30  
31  
32  
33  
34  
35  
36  
37  
38  
39  
40  
41  
42  
43  
44  
45  
46  
47  
48  
49  
50  
51  
52  
53  
54  
55  
56  
57  
58  
59  
60

<sup>a</sup> SAS: Specialty and Specialty Associate Doctors

<sup>b</sup> Burnout defined as an emotional exhaustion score  $\geq 27$  (range 0-54) and/or depersonalisation score  $\geq 10$  (range 0-30) in accordance with the Maslach Burnout Inventory

<sup>c</sup> Odds ratio based on univariable Firth corrected logistic regression of wellbeing item vs burnout with stratification for group (consultant, SAS, trainee)

For peer review only

Table 5. Univariable and multivariable logistic regression results (using Firth bias correction).

| Predictor variable                                                   | Burnout <sup>a</sup>  |                      | Any DMP <sup>b</sup> |                      |
|----------------------------------------------------------------------|-----------------------|----------------------|----------------------|----------------------|
|                                                                      | Crude OR <sup>c</sup> | Adjusted OR          | Crude OR             | Adjusted OR          |
| Grade (versus consultants)                                           |                       |                      |                      |                      |
| SAS <sup>d</sup>                                                     | 0.93<br>(0.70; 1.24)  | 1.14<br>(0.83; 1.55) | 0.47<br>(0.28; 0.73) | 0.40<br>(0.23; 0.65) |
| Trainees                                                             | 1.63<br>(1.39; 1.90)  | 1.00<br>(0.77; 1.31) | 0.66<br>(0.53; 0.82) | 0.47<br>(0.32; 0.70) |
| Age (per 5 years)                                                    | 0.87<br>(0.84; 0.90)  | 0.92<br>(0.87; 0.98) | 1.04<br>(0.99; 1.09) | 0.93<br>(0.85; 1.02) |
| Female (versus male)                                                 | 1.12<br>(0.95; 1.31)  | 0.97<br>(0.81; 1.16) | 0.70<br>(0.56; 0.87) | 0.70<br>(0.55; 0.89) |
| Ethnicity (versus white)                                             |                       |                      |                      |                      |
| Asian                                                                | 0.54<br>(0.45; 0.65)  | 0.74<br>(0.60; 0.91) | 0.98<br>(0.77; 1.25) | 1.15<br>(0.85; 1.54) |
| Black                                                                | 0.57<br>(0.41; 0.78)  | 0.73<br>(0.51; 1.02) | 0.79<br>(0.48; 1.24) | 0.90<br>(0.53; 1.47) |
| Mixed                                                                | 0.75<br>(0.54; 1.03)  | 0.82<br>(0.58; 1.15) | 1.53<br>(1.01; 2.27) | 1.89<br>(1.21; 2.89) |
| Other                                                                | 1.37<br>(0.88; 2.12)  | 2.19<br>(1.37; 3.52) | 0.84<br>(0.40; 1.59) | 0.64<br>(0.29; 1.30) |
| Children                                                             | 0.53<br>(0.46; 0.62)  | 0.78<br>(0.64; 0.97) | 1.10<br>(0.88; 1.38) | 1.03<br>(0.75; 1.41) |
| Current relationship                                                 | 0.65<br>(0.54; 0.78)  | 0.87<br>(0.70; 1.07) | 1.06<br>(0.82; 1.40) | 1.07<br>(0.79; 1.46) |
| Medical Qualification from United Kingdom/Ireland (vs other country) | 2.13<br>(1.81; 2.51)  | 1.74<br>(1.41; 2.16) | 1.06<br>(0.85; 1.33) | 0.84<br>(0.63; 1.14) |
| Full time (vs Less Than Full Time)                                   | 1.30<br>(1.06; 1.59)  | 1.28<br>(1.02; 1.62) | 1.19<br>(0.90; 1.61) | 0.91<br>(0.65; 1.27) |
| Burnout                                                              |                       |                      | 3.84<br>(3.08; 4.79) | 4.35<br>(3.46; 5.49) |

<sup>a</sup>Burnout defined as an emotional exhaustion score  $\geq 27$  (range 0-54) and/or depersonalisation score  $\geq 10$  (range 0-30) in accordance with the Maslach Burnout Inventory

<sup>b</sup>Defensive medical practice (DMP) defined as elevated levels of avoidance and/or hedging behaviour

<sup>c</sup>OR: Odds Ratio

<sup>d</sup>SAS: Specialty and Specialty Associate Doctors

## Supplementary Online Content

eTable 1. Missing data among actively practicing participants

eTable 2. Demographic data of trainees in study and Royal College of Obstetricians and Gynaecologists Training Evaluation Form (TEF) 2018 Survey

eTable 3. Spearman correlations between Maslach Burnout Inventory (MBI) and Defensive Medical Practice (DMP) subscales

eTable 4. Descriptive statistics and crude odds ratio of defensive practice according to each Maslach Burnout Inventory subscale

eFigure 1. Scatter plot of Emotion Exhaustion and Depersonalization Maslach Burnout Inventory subscales

eFigure 2. Nomograms of the multivariable logistic regression models for burnout and any Defensive Medical Practice

eDiscussion. Survey response rate amongst trainees

eMethods. Survey questionnaire

**eTable 1. Missing data among actively practicing participants**

|                                                | <b>Consultants<br/>N=1462</b> | <b>SAS<sup>a</sup><br/>N=254</b> | <b>Trainees<br/>N=1357</b> |
|------------------------------------------------|-------------------------------|----------------------------------|----------------------------|
| Age, mean (range)                              | None missing                  | None missing                     | None missing               |
| Gender                                         | 19 (1%)                       | 2 (1%)                           | 20 (1%)                    |
| Ethnicity                                      | 10 (1%)                       | 1 (<1%)                          | 8 (1%)                     |
| Parity                                         | None missing                  | None missing                     | None missing               |
| Relationship                                   | 3 (<1%)                       | None missing                     | 5 (<1%)                    |
| Medical Qualification country of origin        | None missing                  | 1 (<1%)                          | 1 (<1%)                    |
| Work status (Full Time vs Less Than Full Time) | None missing                  | 1 (<1%)                          | 2 (<1%)                    |
| Maslach Burnout Inventory                      | None missing                  | None missing                     | None missing               |
| Defensive practice                             | None missing                  | None missing                     | None missing               |

<sup>a</sup>SAS: Specialty and Specialty Associate Doctors

**eTable 2. Demographic data of trainees in study and Royal College of Obstetricians and Gynaecologists (RCOG) Training Evaluation Form (TEF) 2018 Survey**

|              | <b>RCOG TEF Database<br/>(n=1754) (%)<sup>a</sup></b> | <b>Trainees<br/>(n=1357) (%)</b> |
|--------------|-------------------------------------------------------|----------------------------------|
| Age          |                                                       |                                  |
| 20-29        | 497 (28.3%)                                           | 336 (24.8%)                      |
| 30-29        | 1092 (62.3%)                                          | 897 (66.1%)                      |
| 40-49        | 106 (6.0%)                                            | 115 (8.4%)                       |
| 50-59        | 2 (0.1%)                                              | 9 (0.7%)                         |
| Over 60      | 0                                                     | 0                                |
| Missing data | 57 (3.3%)                                             | 0                                |
| Female       | 1387 (79.1%)                                          | 1067 (79.8%)                     |
| Ethnicity    |                                                       |                                  |
| White        | 1108 (63.2%)                                          | 857 (63.2%)                      |
| Asian        | 381 (21.7%)                                           | 288 (21.2%)                      |
| Black        | 97 (5.5%)                                             | 90 (6.6%)                        |
| Mixed        | 83 (4.7%)                                             | 88 (6.5%)                        |
| Other        | 68 (3.9%)                                             | 26 (1.9%)                        |
| Missing data | 17 (1%)                                               | 8 (0.6%)                         |

<sup>a</sup> RCOG TEF survey sent to 1956 trainees who held a National Training Number and an email address associated with an active ePortfolio at the time of the survey, which is used to assess competencies and training progress. It was responded to by 1754 trainees (89.7% response rate).

**eTable 3. Spearman correlations between Maslach Burnout Inventory and defensive medical practice subscales**

|                             | <b>EE<sup>b</sup></b> | <b>DP<sup>c</sup></b> | <b>PA<sup>d</sup></b> | <b>Av<sup>e</sup></b> | <b>He<sup>f</sup></b> |
|-----------------------------|-----------------------|-----------------------|-----------------------|-----------------------|-----------------------|
| <b>MBI<sup>a</sup> – EE</b> | 1                     |                       |                       |                       |                       |
| <b>MBI – DP</b>             | 0.57                  | 1                     |                       |                       |                       |
| <b>MBI – PA</b>             | -0.30                 | -0.34                 | 1                     |                       |                       |
| <b>Av</b>                   | 0.28                  | 0.30                  | -0.19                 | 1                     |                       |
| <b>He</b>                   | 0.34                  | 0.38                  | -0.17                 | 0.41                  | 1                     |

<sup>a</sup> MBI: Maslach Burnout Inventory

<sup>b</sup> EE: Emotional Exhaustion

<sup>c</sup> DP: Depersonalization

<sup>d</sup> PA: Personal Accomplishment

<sup>e</sup> Av: Avoidance

<sup>f</sup> He: Hedging

For peer review only



**eTable 4. Descriptive statistics of defensive practice according to each Maslach Burnout Inventory (MBI) subscale**

| MBI <sup>a</sup> subscales       | Avoidance  |                     | Hedging    |                     | Any DMP <sup>b</sup> |
|----------------------------------|------------|---------------------|------------|---------------------|----------------------|
|                                  | Mean score | % Elevated          | Mean score | % Elevated          | %                    |
| High emotional exhaustion        |            |                     |            |                     |                      |
| No (n=2157)                      | 0.88       | 85 (4%)             | 3.76       | 125 (6%)            | 179 (8%)             |
| Yes (n=916)                      | 1.82       | 111 (12%)           | 7.05       | 164 (18%)           | 221 (24%)            |
| Odds ratio <sup>c</sup> (95% CI) |            | 3.36<br>(2.51-4.51) |            | 3.54<br>(2.77-4.54) | 3.51<br>(2.83-4.36)  |
| High depersonalization           |            |                     |            |                     |                      |
| No (n=2468)                      | 0.95       | 106 (4%)            | 3.93       | 159 (6%)            | 229 (9%)             |
| Yes (n=605)                      | 2.02       | 90 (15%)            | 8.06       | 130 (21%)           | 171 (28%)            |
| Odds ratio <sup>c</sup> (95% CI) |            | 3.89<br>(2.89-5.23) |            | 3.97<br>(3.09-5.11) | 3.85<br>(3.08-4.81)  |
| Low personal accomplishment      |            |                     |            |                     |                      |
| No (n=2066)                      | 0.97       | 103 (5%)            | 4.19       | 142 (7%)            | 202 (10%)            |
| Yes (n=1007)                     | 1.55       | 93 (9%)             | 5.87       | 147 (15%)           | 198 (20%)            |
| Odds ratio <sup>c</sup> (95% CI) |            | 1.94<br>(1.45-2.59) |            | 2.31<br>(1.81-2.96) | 2.26<br>(1.83-2.79)  |

<sup>a</sup> MBI: Maslach Burnout Inventory

<sup>b</sup> DMP: Defensive Medical Practice

<sup>c</sup> Odds ratios are based on univariable logistic regression with Firth bias correction.

**eFigure 1. Scatter plot of Emotion Exhaustion and Depersonalization  
Maslach Burnout Inventory subscales**

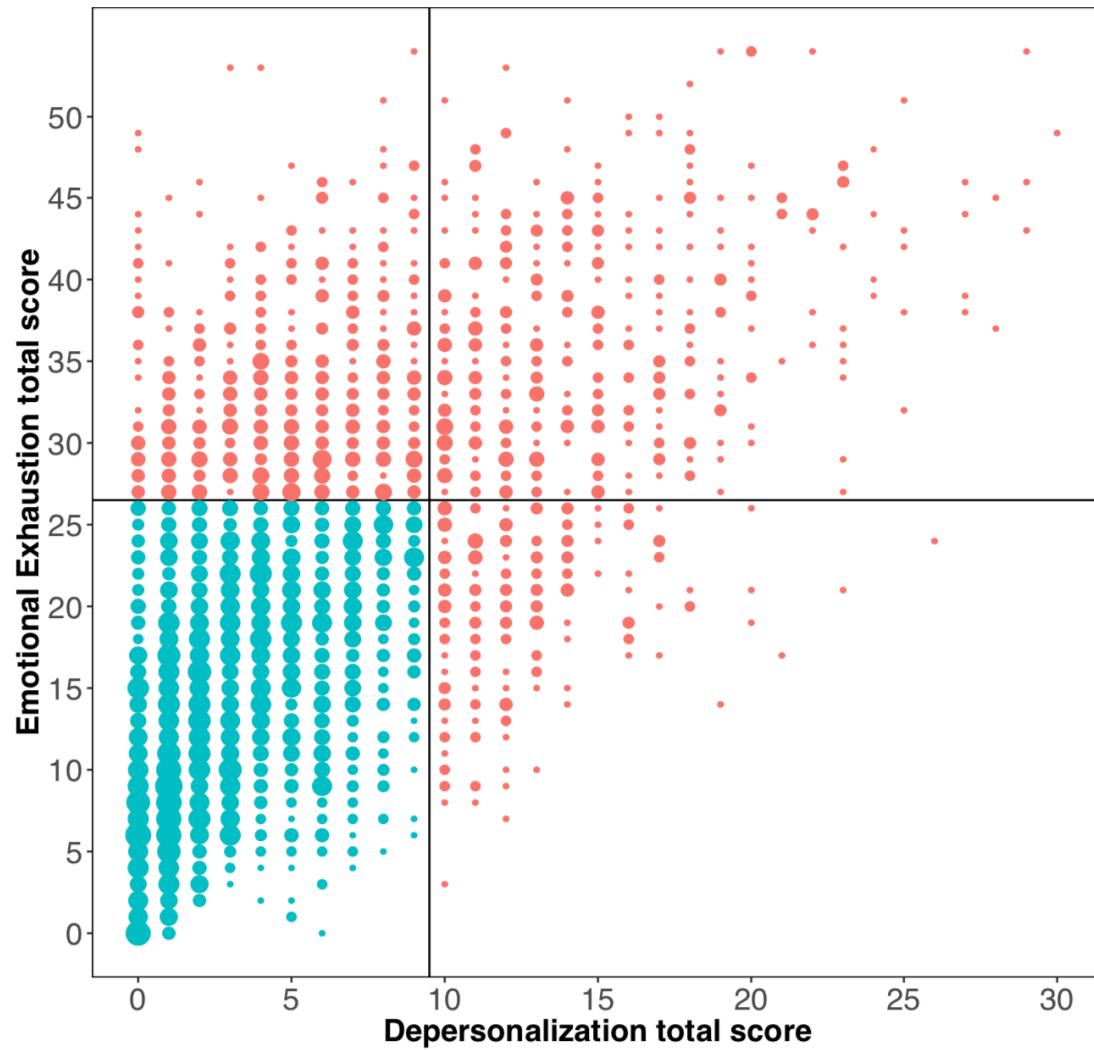

The cutoff values used to define burnout (emotional exhaustion  $\geq 27$  and depersonalization  $\geq 10$ ) are shown with a line with cases meeting the threshold in red. The size of the dots corresponds to the number of cases with these values.

**eFigure 2. Nomograms of the multivariable logistic regression models for burnout (A) and any defensive medical practice (B)**

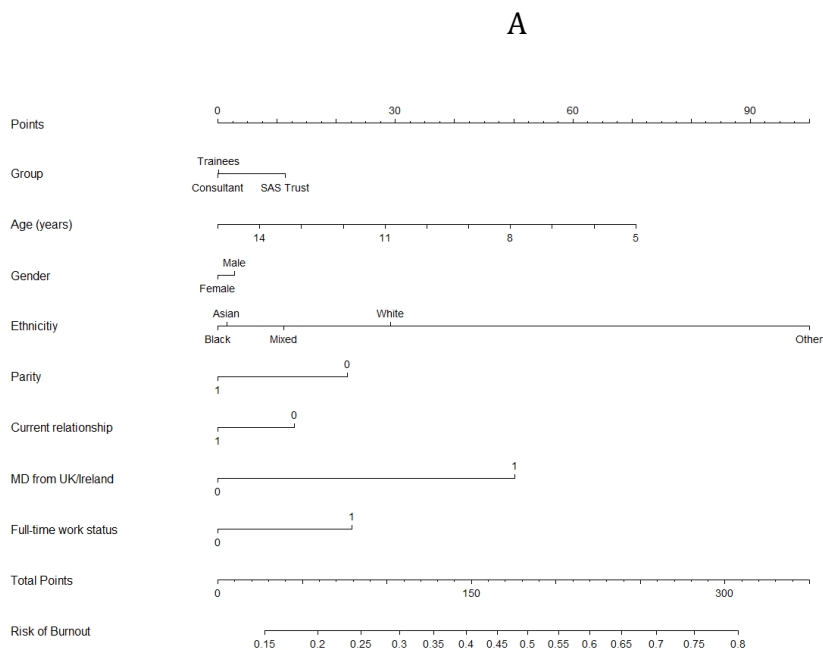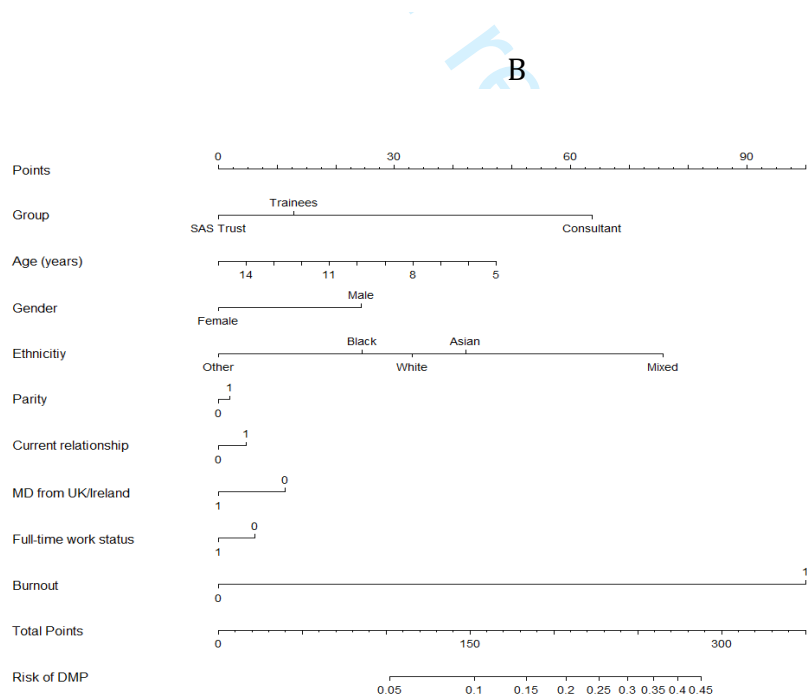

### **eDiscussion. Survey response rate amongst trainees**

Our survey study was sent to trainees working in Obstetrics and Gynecology in the United Kingdom, registered with the Royal College of Obstetricians and Gynaecologists (RCOG) and identified as trainees on the RCOG main database (n=2375) which is the system from which data is extracted for mailings. This is not however the same list used to distribute the RCOG TEF survey (n=1956, eTable 2 in the Supplement) which is sent to trainees who currently hold a National Training Number and an email address associated with an active ePortfolio, which is used to assess competencies and training progress. In view of this, we believe that a proportion of trainees to whom our survey was sent to (based on being identified as a trainee on the RCOG main database) are likely to have been left on the distribution list, but have in fact subsequently suspended training for a period of time or who are no longer trainees and have not informed the RCOG. These doctors would therefore not have completed the survey. This may account for a proportion of the difference in the numbers of trainees between the mailing list we used and that used for the RCOG TEF survey.

## eMethods. Survey Questionnaire

The survey was sent to three participant groups: consultants, specialty and specialty associate (SAS) doctors and trainees with each receiving a tailored version. The questions are marked accordingly.

We are unfortunately unable to include the Maslach Burnout Inventory questionnaire items as these are copyright restricted.

### Section 1: About you

*The following questions apply to all doctors:*

Age

Gender

Female

Male

Intersex

Other (Specify)

I do not wish to disclose

Ethnicity

Asian/Asian British

Bangladeshi

British

Indian

Pakistani

Sri Lankan

Black/African/Caribbean/Black British

African

British

Caribbean

Mixed/multiple ethnic groups

British

White & Asian

White & Black African

White & Black Caribbean

White (UK & Ireland)

British

English

Irish

Northern Irish

Scottish

Welsh

Other Ethnic Group

Arab

Chinese

Dutch

Egyptian

French

German

Italian

Japanese

Korean

Malaysian

Middle Eastern

Myanmar

Persian

Portuguese

Romanian

Russian

Singaporean

1  
2  
3                   Sri Lankan  
4                   Sudanese  
5                   Other (Specify)  
6                   I do not wish to disclose  
7           Nationality  
8           British  
9           English  
10          Irish  
11          Northern Irish  
12          Scottish  
13          Welsh  
14          American  
15          Australian  
16          Bangladeshi  
17          Barbadian  
18          Canadian  
19          Chinese  
20          Dutch  
21          Egyptian  
22          German  
23          Ghanaian  
24          Greek  
25          Hong Kongers  
26          Indian  
27          Iraqi  
28          Italian  
29          Jamaican  
30          Jordanian  
31          Libyan  
32          Malaysian  
33          Maltese  
34          Mauritian  
35          Myanmar  
36          New Zealander  
37          Nigerian  
38          Pakistani  
39          Polish  
40          Romanian  
41          Singaporean  
42          South African  
43          Sri Lankan  
44          Sudanese  
45          Syrian  
46          Trinidadian  
47          Zimbabwean  
48          Other (Specify)  
49          I do not wish to disclose  
50           Religion or Belief  
51           Atheism  
52           Buddhism  
53           Christianity  
54           Hinduism  
55           Islam  
56           Jainism  
57           Judaism  
58           Quaker  
59           Sikhism  
60           Other (Specify)  
          No religion  
          I do not wish to disclose

1  
2  
3 Disability

4 Yes

5 No

6 I do not wish to disclose

7 Do you have children?

8 No

9 One

10 Two

11 Three

12 Four +

13 I do not wish to disclose

14 In what country did you obtain your primary medical degree?

15  
16 ***The following question applies to trainees only:***

17 How many years have you been qualified as a doctor? Number

18  
19 ***The following questions apply to SAS doctors only:***

20 Have you ever held a UK National Training Number (NTN)?

21 Yes

22 No

23 If no, are you interested in acquiring one?

24 Yes

25 No

26 Other (please specify)

27 Are you working towards entry on the specialist register through the Certificate of Eligibility for  
28 Specialist Registration (CESR)?

29 Yes

30 No

31 No - I am not currently working towards it but am planning to in the future

32 No - I am already on the specialist register

33 Undecided

34 Other (specify)

35 If you are already on the Specialist Register, have you applied for consultant posts?

36 Yes - but not yet successful

37 No

38 N/A

39 Other (please specify)

40 What category of RCOG membership are you in?

41 Associate

42 Fellow

43 Member

44 Are you currently involved in College work?

45 No

46 Yes - examiner

47 Yes - committee member

48 Yes - advisory group

49 Yes - working group

50 Not currently - but have been in past or other (please specify)

51  
52 ***The following questions apply to consultants only:***

53 In which country was the majority of your specialty training completed

54 How many years have you been qualified to be a consultant?

55  
56 **Section 2: Your Role**

57 ***The following questions apply to trainees only:***

58 What best describes your current work status?

59 Specialty Trainee (ST)

60 Parental leave

Out of programme (OOP) research

OOP clinical experience

- 1  
2  
3 OOP career break  
4 OOP teaching  
5 OOP research/teaching  
6 OOP clinical experience/teaching  
7 Academic clinical fellow  
8 Academic clinical lecturer  
9 Subspecialty training (SST) Gynaecological Oncology  
10 SST Maternal and Fetal Medicine  
11 Fixed Term Specialty Training Appointment (FTSTA)  
12 Medical Training Initiative (MTI)  
13 SST Urogynaecology  
14 SST Reproductive Medicine  
15 Clinical Fellow  
16 Other (specify)  
17 Who is your training Local Education and Training Board (LETB)/Deanery?  
18 East of England  
19 Kent, Surrey and Sussex  
20 Merseyside  
21 North Central and East London  
22 North East  
23 North West  
24 North West London  
25 Northern Ireland  
26 Oxford  
27 Scotland  
28 Severn  
29 South London  
30 South West  
31 Thames Valley  
32 Wales  
33 Wessex  
34 West Midlands  
35 Yorkshire and the Humber  
36 Other (specify)  
37 What training level are you at?  
38 ST1  
39 ST2  
40 ST3  
41 ST4  
42 ST5  
43 ST6  
44 ST7  
45 Other (specify)  
46 If relevant, what is your sub-speciality/special interest?  
47 Abortion care/sexual health  
48 Paediatric and adolescent gynaecology  
49 Reproductive medicine/Subfertility  
50 Urogynaecology  
51 Vulval disease  
52 Medical education  
53 Minimal access surgery  
54 Risk management  
55 Patient Safety leadership  
56 Leadership  
57 Acute gynaecology and early pregnancy  
58 Benign gynaecology surgery  
59 Colposcopy and cervical pathology  
60 Fetal Medicine  
Gynaecological oncology  
High-risk pregnancy and maternal medicine



1  
2  
3  
4  
5  
6  
7  
8  
9  
10  
11  
12  
13  
14  
15  
16  
17  
18  
19  
20  
21  
22  
23  
24  
25  
26  
27  
28  
29  
30  
31  
32  
33  
34  
35  
36  
37  
38  
39  
40  
41  
42  
43  
44  
45  
46  
47  
48  
49  
50  
51  
52  
53  
54  
55  
56  
57  
58  
59  
60

Labour ward  
Menopause/post-reproductive health  
Sub Specialty - Gynaecological oncology  
Sub Specialty - Maternal and fetal medicine  
Sub Specialty - Reproductive medicine  
Sub Specialty - Urogynaecology  
Sub Specialty - Sexual and Reproductive Health

N/A

Other (Specify)

Do you do any non-NHS work and/or non O&G work?

Yes

No

***The following questions apply to SAS doctors only:***

What best describes your current work status?

Actively practising in healthcare outside of O&G

Actively practising in O&G

On a career break/sabbatical

On parental leave

On sick leave

Other (specify)

What job title do you have?

Specialty Doctor

Associate Specialist

Staff grade

Trust Doctor

Trust Registrar

Clinical Fellow

Clinical Assistant

Locum Appointment for Training/Service

Foundation Year 3

Other (Specify)

Why did you take up your current post? (select all that apply)

Geographical Stability

Work-life balance

Regular hours

Pay

Not on Specialist register and unable to get a trainee post

On Specialist register but unable to get a consultant post

No on call

Other (specify)

Who are you contracted to work for?

Pure NHS

Joint NHS with other

Joint NHS/academic - majority NHS funded (e.g. honorary academic post)

Pure academic/research (e.g. paid for by university)

Other (Specify)

Do you work in an NHS teaching (tertiary referral) hospital or a District General Hospital? If neither, please give details.

NHS teaching hospital

District General hospital

Neither - please specify

Are you employed on a contract with nationally agreed terms and conditions?

Yes

No

Don't know

In what areas of O&G do you practice?

Gynaecology only

Obstetrics and Gynaecology

Obstetrics only

1  
2  
3 Other (Specify)  
4 Do you have a special interest? (select all that apply)

5 Fertility  
6 Sexual Health  
7 Early Pregnancy  
8 Acute Gynaecology  
9 Leadership  
10 Labour ward  
11 Antenatal care  
12 Maternal Medicine  
13 Fetal Medicine  
14 Diabetic Pregnancy  
15 Gynae-oncology  
16 Colposcopy  
17 Psychosexual health  
18 Benign Gynaecology  
19 Minimally invasive surgery  
20 Menopause  
21 Gynae ultrasound  
22 Obstetric ultrasound  
23 Maternal Mental health  
24 No

25 Do you currently work at a registrar or consultant level

26 Consultant level  
27 Registrar level  
28 Both  
29 Other (specify)

30 Do you do any non-NHS work and/or non O&G work?

31 No  
32 Yes - Please specify

33  
34 ***The following questions apply to consultants only:***

35 What best describes your current work status?

36 Actively practising in healthcare outside O&G  
37 Actively practising in O&G  
38 On a career break/sabbatical  
39 On parental leave  
40 On sick leave  
41 Retired  
42 Other (Specify)

43 Who are you contracted to work for? (Yes/No)

44 Pure NHS  
45 Pure academic/research (e.g paid for by university)  
46 Joint NHS/academic - majority NHS funded (e.g honorary academic post)  
47 Joint NHS/academic - majority academic funded (e.g university with honorary NHS)  
48 Joint NHS with other  
49 Joint academic/research with other  
50 Other (including not currently working)

51 What is your primary post?

52 Consultant O&G  
53 Consultant Gynaecologist  
54 Consultant Obstetrician  
55 Locum Consultant  
56 Consultant Sexual & Reproductive Health  
57 Professor  
58 Acting Consultant  
59 Consultant Private Practice  
60 Consultant GUM  
Academic Senior Clinical Fellow

1  
2  
3  
4  
5  
6  
7  
8  
9  
10  
11  
12  
13  
14  
15  
16  
17  
18  
19  
20  
21  
22  
23  
24  
25  
26  
27  
28  
29  
30  
31  
32  
33  
34  
35  
36  
37  
38  
39  
40  
41  
42  
43  
44  
45  
46  
47  
48  
49  
50  
51  
52  
53  
54  
55  
56  
57  
58  
59  
60

- Honorary Consultant  
Senior Clinical Lecturer Honorary  
Senior Lecturer  
Senior Clinical Research Fellow  
Emeritus Professor  
Other (Specify)
- Which would best describe your post?  
Special interest  
Sub-specialty  
Other (Specify)
- If relevant, what is your subspecialty/special interest?  
Abortion care/sexual health  
Acute gynaecology and early pregnancy  
Benign gynaecological surgery (office gynaecology, hysteroscopy, etc  
Colposcopy and cervical pathology  
Fetal medicine  
Gynaecological oncology  
High risk pregnancy/Maternal medicine  
Labour Ward  
Menopause/Post reproductive health  
Paediatric and adolescent gynaecology  
Reproductive medicine/Subfertility  
Urogynaecology  
Vulval disease  
Medical education  
Minimal access surgery  
Risk management  
Patient Safety leadership  
Leadership  
Sub specialty - Gynaecological oncology  
Sub specialty - Maternal and fetal medicine  
Sub specialty - Reproductive medicine  
Sub specialty - Urogynaecology  
Sub specialty - Sexual and reproductive health  
N/A  
Other (Specify)
- Do you do any private work?  
Yes  
No  
N/A  
Other (Specify)
- Do you hold any of the following leadership roles? (Yes/No)  
Clinical Director  
Medical Director  
Clinical Governance Lead  
Labour Ward Lead  
Special Interest Lead  
Audit Lead  
Risk Management Lead  
No  
Other (specify)
- If yes, how are you remunerated for these lead positions (in terms of programmed activities (PAs))?  
0.5  
1  
1.5  
2  
2.5  
3  
3.5

- 1  
2  
3 4  
4 4.5  
5 5  
6 6  
7 6.5  
8 7  
9 8  
10 10  
11 Responsibility payment  
12 N/A  
13 Are these included in your weekly job plan, or are they additional?  
14 Yes, Includes  
15 No, additional  
16 Other (Specify)

### Section 3: Your Working Patterns and Professional Development

#### *The following questions apply to trainees only:*

19 Do you work full time or less than full time (LTFT)?

- 20 Full-Time  
21 LTFT, (50%)  
22 LTFT, (60%)  
23 LTFT, (70%)  
24 LTFT, (80%)  
25 LTFT, (90%)  
26 Other (Specify)

27 When completing your training do you intend to work full time or LTFT?

- 28 LTFT  
29 Work full time  
30 Uncertain  
31 Other (Specify)

32 What is the on call frequency at your level?

- 33 1:1  
34 1:2  
35 1:3  
36 1:4  
37 1:5  
38 1:6  
39 1:7  
40 1:8  
41 1:9  
42 1:10  
43 1:11  
44 1:12  
45 1:14  
46 1:15  
47 1:16  
48 1:18  
49 1:19  
50 1:20  
51 N/A

51 Other (specify)

52 What type of middle grade on call rota does your unit have during the day, excluding consultant cover?

- 53 Single middle grade on call rota with ST1-2 level cover (including junior cover by other  
54 doctors e.g. Foundation & General Practice (GP) trainees)  
55 Single middle grade on call rota without ST1-2 level cover (including junior cover by other  
56 doctors e.g. Foundation & GP trainees)  
57 Two middle grades on call working at the same level with ST1-2 level cover (including junior  
58 cover by other doctors e.g. Foundation & GP trainees)  
59 Two middle grades on call working at the same level without ST1-2 level cover (including  
60 junior cover by other doctors e.g. Foundation & GP trainees)

1

2

3

Two tier middle grade rota with one senior and one junior middle grade with ST1-2 level cover (including junior cover by other doctors e.g. Foundation & GP trainees)

4

Two tier middle grade rota with one senior and one junior middle grade without ST1-2 level cover (including junior cover by other doctors e.g. Foundation & GP trainees)

5

6

Other (specify)

7

Have you ever taken any time out of programme during your training? (Please select all that apply)

8

9

OOPT

10

OOPE

11

OOPR

12

OOPC

13

OOPE/T

14

OOPR/T

15

Parental leave

16

No

17

Other (please specify)

18

After you complete training what area of O&G do you intend to practice?

19

Benign gynaecological surgery (office gynaecology, hysteroscopy, etc.)

20

Colposcopy and cervical pathology

21

Fetal medicine

22

Gynaecological oncology

23

High risk pregnancy/Maternal medicine

24

Labour Ward

25

Menopause/Post reproductive health

26

Other (specify)

27

After completion of your training do you intend work resident out of hours?

28

Yes

29

No

30

If you intend to work resident out of hours do anticipate this will be for your entire career?

31

Early career only

32

Entire career

33

Unsure

34

N/A

35

Other (specify)

36

Are you aware of gaps in the rota at your level at your current unit?

37

Yes

38

No

39

N/A

40

Do you have specialty doctors (SAS, Trust, etc.) supporting your rotas?

41

Yes

42

No

43

N/A

44

**The following questions apply to SAS doctors only:**  
How many hours/week are you contracted to work?

45

<20

46

20-39

47

40

48

41-50

49

>50

50

Do you work resident out of hours on call?

51

No

52

Yes

53

N/A

54

If yes, is this first on call, second on call or third on call?  
Please specify

55

56

If you work resident out of hours do you anticipate this will be your entire career?

57

Early career only

58

Entire career

59

Other - Please specify

60

N/A

1  
2  
3 Do you work non-resident consultant level out of hours on call?

4 Yes

5 No

6 Other - please specify

7 Does your job plan include at least 4 hours/week (= one session if on programmed activities (PA)  
8 contract) for supporting professional activities (SPA)? (SPA = non clinical time for audit, teaching,  
9 governance, CPD, appraisal)

10 Yes

11 No

12 Don't know

13 When on call what areas do you cover?

14 Gynaecology only

15 Obstetrics and gynaecology

16 Obstetrics only

17 Other (specify)

18 Do you have an educational supervisor?

19 Yes

20 No

21 Don't know

22 Other (specify)

23 Do you work in a formal educational role?

24 Educational supervisor

25 Clinical supervisor

26 Teaching Fellow

27 SAS Tutor

28 Other (specify)

29 Do you have a formal leadership role?

30 Medical Director

31 Associate Medical Director

32 Clinical Director

33 Audit Lead

34 Governance Lead

35 Service Lead

36 Other (specify)

37 Are you, or have you ever been, principle investigator (PI) for a research project?

38 Yes

39 No

40 Other (specify)

41 Are you, or have you ever been, an appraiser?

42 Yes

43 If you were but are no longer an appraiser then why did you stop? (specify)

44 No

45 If yes, do you appraise consultants?

46 Yes

47 No

48 Do you work autonomously (have your own clinics and/or theatre lists)?

49 Yes

50 No

51 If yes, is this work coded in your own name or a consultants name?

52 Own

53 Consultant

54 Don't know

55 Other (specify)

56 ***The following questions apply to consultants only:***

57 Has your workload increased in the last 12 months?

58 Yes

59 No

60 Other (Specify)

Do you work full time or LTFT?

1  
2  
3  
4  
5  
6  
7  
8  
9  
10  
11  
12  
13  
14  
15  
16  
17  
18  
19  
20  
21  
22  
23  
24  
25  
26  
27  
28  
29  
30  
31  
32  
33  
34  
35  
36  
37  
38  
39  
40  
41  
42  
43  
44  
45  
46  
47  
48  
49  
50  
51  
52  
53  
54  
55  
56  
57  
58  
59  
60

Full Time  
LTFT, 10%  
LTFT, 20%  
LTFT, 30%  
LTFT, 40%  
LTFT, 50%  
LTFT, 60%  
LTFT, 70%  
LTFT, 80%  
LTFT, 90%  
N/A

Other (Specify)

How many PAs per week are in your job plan?

Number (to nearest 0.5)

N/A

Other - Specify

Number of Direct Clinical Care PAs

Number (to nearest 0.5)

N/A

Other (Specify)

Number of Supporting Professional Activities (SPAs)

Number (to nearest 0.5)

N/A

Other (Specify)

Number of Academic PAs

Number (to nearest 0.5)

N/A

Other (Specify)

Number of other (i.e. education, managerial) PAs

Number (to nearest 0.5)

N/A

Other (Specify)

What is the O&G split of your daytime PAs?

0% Obstetric, 100% Gynaecology

10% Obstetric, 90% Gynaecology

100% Obstetric, 0% Gynaecology

20% Obstetric, 80% Gynaecology

30% Obstetric, 70% Gynaecology

40% Obstetric, 60% Gynaecology

50% Obstetric, 50% Gynaecology

60% Obstetric, 40% Gynaecology

70% Obstetric, 30% Gynaecology

80% Obstetric, 20% Gynaecology

90% Obstetric, 10% Gynaecology

N/A

Would you like to decrease the amount of obstetric work you do?

Yes

No

N/A

Are any of your PAs out of hours (evening, weekend, emergency, on-call etc.)?

Yes

No

N/A

If you work over night on call would you like to reduce this?

Yes

No

N/A

If you work out of hours, what is your PA split?

0% Obstetric, 100% Gynaecology

10% Obstetric, 90% Gynaecology

1  
2  
3  
4  
5  
6  
7  
8  
9  
10  
11  
12  
13  
14  
15  
16  
17  
18  
19  
20  
21  
22  
23  
24  
25  
26  
27  
28  
29  
30  
31  
32  
33  
34  
35  
36  
37  
38  
39  
40  
41  
42  
43  
44  
45  
46  
47  
48  
49  
50  
51  
52  
53  
54  
55  
56  
57  
58  
59  
60

100% Obstetric, 0% Gynaecology  
20% Obstetric, 80% Gynaecology  
30% Obstetric, 70% Gynaecology  
40% Obstetric, 60% Gynaecology  
50% Obstetric, 50% Gynaecology  
60% Obstetric, 40% Gynaecology  
70% Obstetric, 30% Gynaecology  
80% Obstetric, 20% Gynaecology  
90% Obstetric, 10% Gynaecology  
N/A

Does your job plan require you to work routinely resident in the hospital outside 'office hours'?

Yes  
No  
N/A

If yes, are these twilight/weekend day shifts or can they include time after midnight?

Twilight/weekend day shifts only  
Include time after midnight  
N/A  
Other

Who is resident with you usually for twilight/weekend days?

A junior grade (GP trainee, F2)  
An O&G trainee (or equivalent) (ST1/ST2)  
At least one doctor who is ST3 or higher  
N/A  
Other (Specify)

Who is resident with you usually for after midnight shifts?

A junior grade (GP trainee, F2)  
An O&G trainee (or equivalent) (ST1/ST2)  
At least one doctor who is ST3 or higher  
N/A  
Other (Specify)

Do you plan to reduce sessions as part of your retirement plan?

Yes  
No  
Don't know  
N/A  
Other (Specify)

When (what year) do you plan to retire completely from clinical work?

2018-2019  
2019-2020  
2021-2025  
2026-2030  
2031-2035  
2036-2040  
2041-2045  
2046-2050  
2051-2055  
2056-2060

Do you intend to retire and then return to work?

Yes - please specify intended number of sessions  
No  
Other (Specify)

When on duty are you aware of gaps in the trainee's rotas?

Frequently  
Infrequently  
Never  
Often  
N/A

Are you ever required to fill in for absent staff at a lower grade?

Frequently



1  
2  
3  
4  
5  
6  
7  
8  
9  
10  
11  
12  
13  
14  
15  
16  
17  
18  
19  
20  
21  
22  
23  
24  
25  
26  
27  
28  
29  
30  
31  
32  
33  
34  
35  
36  
37  
38  
39  
40  
41  
42  
43  
44  
45  
46  
47  
48  
49  
50  
51  
52  
53  
54  
55  
56  
57  
58  
59  
60

Infrequently  
Never  
Often  
N/A

Do you have specialty doctors (SAS, Trust, etc.) supporting your rotas?

Yes  
No  
N/A

If yes, which of these roles provide this service? (Yes/No)

Associate Specialist  
LAS/LATs  
Staff Grade  
Trust Doctor  
Other (Specify)

Do you feel you have a team structure that adequately supports your development and practice needs?

Yes - please explain why  
No - please explain why  
Don't know  
N/A

If yes, can we contact you to obtain a copy of your team structure?

Yes  
No  
N/A

#### Section 4: Your Wellbeing

*The following questions apply to trainees and SAS doctors only:*

Since starting specialty training how often have you thought of leaving O&G/medicine entirely?

Daily  
Weekly  
Monthly  
Occasionally  
Never

If you have or would ever consider leaving speciality training what reasons would you give? (Please only tick those that would impact on your decision)

Family  
Lack of work-life balance  
Pay  
Long working hours  
Shift working  
Intense workload  
Rota gaps  
Desire to work abroad  
Inability to work less than full time  
Issues with gaining adequate clinical experience when working less than full time  
Preference to work in another geographic area  
Preference to work in another specialty  
Personal Health  
Physical demands of the job  
Personal mental health  
Stress  
Lack of clinical supervision  
Poor pastoral support  
Poor educational supervision  
Low morale  
No support from colleagues  
No social interaction with colleagues  
Commuting distance  
Frustration with training  
Frustration with health service

1  
2  
3  
4  
5  
6  
7  
8  
9  
10  
11  
12  
13  
14  
15  
16  
17  
18  
19  
20  
21  
22  
23  
24  
25  
26  
27  
28  
29  
30  
31  
32  
33  
34  
35  
36  
37  
38  
39  
40  
41  
42  
43  
44  
45  
46  
47  
48  
49  
50  
51  
52  
53  
54  
55  
56  
57  
58  
59  
60

- Blame culture
- Lack of improvement
- Litigation
- Fear of litigation
- No opportunities to debrief following adverse event or serious incident
- No support following adverse event or serious incident
- Patient care/safety concerns
- Concerns with new contract
- Insufficient financial remuneration
- Under resourced health service
- N/A
- Other (Specify)

What are the positive aspects of O&G that you experience and make you want to pursue this as your chosen career? (Please select all that apply)

- Unique mix of medicine and surgery
- Good communication / team working
- Demonstrating your ability to cope well under pressure
- Good support from colleagues
- Good support from trainers/supervisors
- A balanced work intensity that makes the job interesting and enjoyable
- Financial remuneration
- Sub-Specialty training
- Academic training
- Research opportunities
- Personally fulfilling/rewarding
- Challenging (but with appropriate support)
- Out of programme opportunities
- Ability to work flexibly
- Being seen as a valued team member
- Don't know
- Other (Specify)

Do post-shift rest facilities exist within your hospital (e.g. a sleep off room)?

- Yes
- No
- I don't know

Have you ever used such facilities?

- Yes
- No
- N/A

If they exist, how easily accessible are these facilities?

- Difficult
- Don't know
- Easy
- Some effort
- Very difficult
- Very easy
- N/A

Do you have accessible and adequate rest facilities available during your night shifts (i.e. private area with bedding/comfortable chair)?

- Yes
- No
- I don't know
- N/A

Have you ever used such facilities?

- Yes
- No
- N/A

If they exist, how easily accessible are these facilities?

- Difficult
- Don't know

1  
2  
3  
4  
5  
6  
7  
8  
9  
10  
11  
12  
13  
14  
15  
16  
17  
18  
19  
20  
21  
22  
23  
24  
25  
26  
27  
28  
29  
30  
31  
32  
33  
34  
35  
36  
37  
38  
39  
40  
41  
42  
43  
44  
45  
46  
47  
48  
49  
50  
51  
52  
53  
54  
55  
56  
57  
58  
59  
60

Easy  
Some effort  
Very difficult  
Very easy  
N/A

How often do you sleep for at least 30 minutes uninterrupted during a night shift?

About half  
Less than half  
Most shifts  
Never  
N/A

How do you normally commute home after a night shift?

Cycle  
Drive - car  
Drive - motorcycle  
Other (Specify)  
Public transport  
Taxi or equivalent  
Walk  
N/A

How long does your commute usually take after a night shift?

15-30 minutes  
30-60 minutes  
< 15 minutes  
> 60 minutes  
N/A

If applicable, do you ever feel too tired to drive home after a night shift?

Yes  
No  
N/A

If applicable, have you ever had an accident/near miss when driving home after a night shift?

No  
Yes  
Prefer not to say  
N/A

*The following sections apply to all doctors*

**Section 5: Maslach Burnout Inventory (Copyright Restricted)**

**Section 6: Defensive Medical Practice**

Within the last 6 months, have you ever taken the following actions which you would not have done if you were not worried about possible consequences such as complaints, disciplinary actions by managers, being sued, or publicity in the media? For each of the following, please rate each item on a 5-point Likert scale

Avoidance (3 items)

Avoided a particular type of invasive procedure

Never  
Rarely  
Sometimes  
Quite often  
Often

Not accepted "high risk" patients in order to avoid possible complications

Never  
Rarely  
Sometimes  
Quite often  
Often

Stopped doing aspects of your job

Never

- 1  
2  
3 Rarely  
4 Sometimes  
5 Quite often  
6 Often  
7 Hedging (9 items)  
8 Prescribed more medications than medically indicated  
9 Never  
10 Rarely  
11 Sometimes  
12 Quite often  
13 Often  
14 Referred to specialists in unnecessary circumstances  
15 Never  
16 Rarely  
17 Sometimes  
18 Quite often  
19 Often  
20 Conducted more investigations or made more referrals than warranted by the patient's  
21 condition  
22 Never  
23 Rarely  
24 Sometimes  
25 Quite often  
26 Often  
27 Admitted patients to hospital when the patient could have been discharged home safely or  
28 managed as an outpatient  
29 Never  
30 Rarely  
31 Sometimes  
32 Quite often  
33 Often  
34 Asked for more frequent observations to be carried out on a patient than necessary  
35 Never  
36 Rarely  
37 Sometimes  
38 Quite often  
39 Often  
40 Written in patients' records specific remarks such as "not suicidal" which you would not if you  
41 were not worried about legal/media/disciplinary consequences  
42 Never  
43 Rarely  
44 Sometimes  
45 Quite often  
46 Often  
47 Written more letters about a patient than is necessary to communicate about the patient's  
48 condition  
49 Referred patient for a second opinion more than necessary  
50 Never  
51 Rarely  
52 Sometimes  
53 Quite often  
54 Often  
55 Carried out more tests than necessary  
56 Never  
57 Rarely  
58 Sometimes  
59 Quite often  
60 Often

## Section 7: Doctor Wellbeing

1  
2  
3 In the past 12 months have you experienced:

4 Cardio-vascular problems (e.g. high blood pressure, angina, heart attack)

5 Yes

6 No

7 Gastro-intestinal problems (e.g. gastritis, irritable bowel syndrome, ulcers)

8 Yes

9 No

10 Depression

11 Yes

12 No

13 Anxiety

14 Yes

15 No

16 Anger & irritability

17 Yes

18 No

19 Other mental health problems

20 Yes

21 No

22 Suicidal thoughts

23 Yes

24 No

25 Sleep problems/insomnia

26 Yes

27 No

28 Marital/relationship problems

29 Yes

30 No

31 Frequent headaches

32 Yes

33 No

34 Minor colds

35 Yes

36 No

37 Recurring respiratory infections

38 Yes

39 No

40 None of the above

41 Yes

42 No

43 Other

44 Yes (please specify)

45 No

46 Any additional life stressors (e.g. bereavement, accident etc.)

47 Yes – currently (in the last 6 months)

48 Yes – in the past (more than 6 months ago)

49 No

50 Have you ever been aware of, or other people raised concerns, that you are drinking too much  
51 alcohol or taking (prescribed or non-prescribed) drugs?  
52  
53  
54  
55  
56  
57  
58  
59  
60

STROBE Statement—Checklist of items that should be included in reports of *cohort studies*

|                           | Item No | Recommendation                                                                                                                                                                                                                                                                                                         | Page No                              |
|---------------------------|---------|------------------------------------------------------------------------------------------------------------------------------------------------------------------------------------------------------------------------------------------------------------------------------------------------------------------------|--------------------------------------|
| <b>Title and abstract</b> | 1       | (a) Indicate the study's design with a commonly used term in the title or the abstract<br>(b) Provide in the abstract an informative and balanced summary of what was done and what was found                                                                                                                          | 1<br>2-3                             |
| <b>Introduction</b>       |         |                                                                                                                                                                                                                                                                                                                        |                                      |
| Background/rationale      | 2       | Explain the scientific background and rationale for the investigation being reported                                                                                                                                                                                                                                   | 5-6                                  |
| Objectives                | 3       | State specific objectives, including any prespecified hypotheses                                                                                                                                                                                                                                                       | 6-7                                  |
| <b>Methods</b>            |         |                                                                                                                                                                                                                                                                                                                        |                                      |
| Study design              | 4       | Present key elements of study design early in the paper                                                                                                                                                                                                                                                                | 7                                    |
| Setting                   | 5       | Describe the setting, locations, and relevant dates, including periods of recruitment, exposure, follow-up, and data collection                                                                                                                                                                                        | 7                                    |
| Participants              | 6       | (a) Give the eligibility criteria, and the sources and methods of selection of participants. Describe methods of follow-up<br>(b) For matched studies, give matching criteria and number of exposed and unexposed                                                                                                      | 7-8                                  |
| Variables                 | 7       | Clearly define all outcomes, exposures, predictors, potential confounders, and effect modifiers. Give diagnostic criteria, if applicable                                                                                                                                                                               | 8-9                                  |
| Data sources/measurement  | 8*      | For each variable of interest, give sources of data and details of methods of assessment (measurement). Describe comparability of assessment methods if there is more than one group                                                                                                                                   | 8-9                                  |
| Bias                      | 9       | Describe any efforts to address potential sources of bias                                                                                                                                                                                                                                                              | N/A                                  |
| Study size                | 10      | Explain how the study size was arrived at                                                                                                                                                                                                                                                                              | N/A                                  |
| Quantitative variables    | 11      | Explain how quantitative variables were handled in the analyses. If applicable, describe which groupings were chosen and why                                                                                                                                                                                           | 9-10                                 |
| Statistical methods       | 12      | (a) Describe all statistical methods, including those used to control for confounding<br>(b) Describe any methods used to examine subgroups and interactions<br>(c) Explain how missing data were addressed<br>(d) If applicable, explain how loss to follow-up was addressed<br>(e) Describe any sensitivity analyses | 9-10<br>9-10<br>9-10<br>9-10<br>9-10 |
| <b>Results</b>            |         |                                                                                                                                                                                                                                                                                                                        |                                      |
| Participants              | 13*     | (a) Report numbers of individuals at each stage of study—eg numbers potentially eligible, examined for eligibility, confirmed eligible, included in the study, completing follow-up, and analysed<br>(b) Give reasons for non-participation at each stage<br>(c) Consider use of a flow diagram                        | 10-11<br>10-11<br>N/A                |
| Descriptive data          | 14*     | (a) Give characteristics of study participants (eg demographic, clinical, social) and information on exposures and potential confounders<br>(b) Indicate number of participants with missing data for each variable of interest<br>(c) Summarise follow-up time (eg, average and total amount)                         | 10-11<br>10-11<br>N/A                |
| Outcome data              | 15*     | Report numbers of outcome events or summary measures over time                                                                                                                                                                                                                                                         | 11                                   |

|    |                          |    |                                                                                                                                                                                                              |       |
|----|--------------------------|----|--------------------------------------------------------------------------------------------------------------------------------------------------------------------------------------------------------------|-------|
| 1  | Main results             | 16 | (a) Give unadjusted estimates and, if applicable, confounder-adjusted estimates and their precision (eg, 95% confidence interval). Make clear which confounders were adjusted for and why they were included | 11-13 |
| 2  |                          |    | (b) Report category boundaries when continuous variables were categorized                                                                                                                                    | 11-13 |
| 3  |                          |    | (c) If relevant, consider translating estimates of relative risk into absolute risk for a meaningful time period                                                                                             | N/A   |
| 4  |                          |    |                                                                                                                                                                                                              |       |
| 5  | Other analyses           | 17 | Report other analyses done—eg analyses of subgroups and interactions, and sensitivity analyses                                                                                                               | 11-13 |
| 6  |                          |    |                                                                                                                                                                                                              |       |
| 7  | <b>Discussion</b>        |    |                                                                                                                                                                                                              |       |
| 8  | Key results              | 18 | Summarise key results with reference to study objectives                                                                                                                                                     | 13-14 |
| 9  | Limitations              | 19 | Discuss limitations of the study, taking into account sources of potential bias or imprecision. Discuss both direction and magnitude of any potential bias                                                   | 16    |
| 10 | Interpretation           | 20 | Give a cautious overall interpretation of results considering objectives, limitations, multiplicity of analyses, results from similar studies, and other relevant evidence                                   | 13-16 |
| 11 | Generalisability         | 21 | Discuss the generalisability (external validity) of the study results                                                                                                                                        | 13-16 |
| 12 |                          |    |                                                                                                                                                                                                              |       |
| 13 | <b>Other information</b> |    |                                                                                                                                                                                                              |       |
| 14 | Funding                  | 22 | Give the source of funding and the role of the funders for the present study and, if applicable, for the original study on which the present article is based                                                | 17    |

\*Give information separately for exposed and unexposed groups.

**Note:** An Explanation and Elaboration article discusses each checklist item and gives methodological background and published examples of transparent reporting. The STROBE checklist is best used in conjunction with this article (freely available on the Web sites of PLoS Medicine at <http://www.plosmedicine.org/>, Annals of Internal Medicine at <http://www.annals.org/>, and Epidemiology at <http://www.epidem.com/>). Information on the STROBE Initiative is available at <http://www.strobe-statement.org>.

# BMJ Open

## Burnout, Wellbeing and Defensive Medical Practice amongst Obstetricians and Gynaecologists in the United Kingdom: cross-sectional survey study

|                                 |                                                                                                                                                                                                                                                                                                                                                                                                                                                                                                                                                                                                                                                                                                                                                                                                                                                                         |
|---------------------------------|-------------------------------------------------------------------------------------------------------------------------------------------------------------------------------------------------------------------------------------------------------------------------------------------------------------------------------------------------------------------------------------------------------------------------------------------------------------------------------------------------------------------------------------------------------------------------------------------------------------------------------------------------------------------------------------------------------------------------------------------------------------------------------------------------------------------------------------------------------------------------|
| Journal:                        | <i>BMJ Open</i>                                                                                                                                                                                                                                                                                                                                                                                                                                                                                                                                                                                                                                                                                                                                                                                                                                                         |
| Manuscript ID                   | bmjopen-2019-030968.R2                                                                                                                                                                                                                                                                                                                                                                                                                                                                                                                                                                                                                                                                                                                                                                                                                                                  |
| Article Type:                   | Original research                                                                                                                                                                                                                                                                                                                                                                                                                                                                                                                                                                                                                                                                                                                                                                                                                                                       |
| Date Submitted by the Author:   | 06-Oct-2019                                                                                                                                                                                                                                                                                                                                                                                                                                                                                                                                                                                                                                                                                                                                                                                                                                                             |
| Complete List of Authors:       | Bourne, Tom; Imperial College London, Obstetrics and Gynaecology, Queen Charlotte's and Chelsea Hospital; KU Leuven, Department of Development & Regeneration<br>Shah, Harsha; Imperial College London, Obstetrics and Gynaecology, Queen Charlotte's and Chelsea Hospital<br>Falconieri, Nora; KU Leuven, Department of Development & Regeneration<br>Timmerman, Dirk; KU Leuven, Department of Development & Regeneration<br>Lees, Christoph; Imperial College London, Obstetrics and Gynaecology, Queen Charlotte's and Chelsea Hospital<br>Wright, Alison; Royal Free Hospital<br>Lumsden, Mary Ann; University of Glasgow, Department of Obstetrics and Gynaecology<br>Regan, Lesley; Imperial College Healthcare NHS Trust, Department of Obstetrics and Gynaecology, St Mary's Hospital<br>Van Calster, Ben; KU Leuven, Department of Development & Regeneration |
| <b>Primary Subject Heading</b>: | Health services research                                                                                                                                                                                                                                                                                                                                                                                                                                                                                                                                                                                                                                                                                                                                                                                                                                                |
| Secondary Subject Heading:      | Obstetrics and gynaecology, Health policy                                                                                                                                                                                                                                                                                                                                                                                                                                                                                                                                                                                                                                                                                                                                                                                                                               |
| Keywords:                       | OBSTETRICS, GYNAECOLOGY, Health policy < HEALTH SERVICES ADMINISTRATION & MANAGEMENT                                                                                                                                                                                                                                                                                                                                                                                                                                                                                                                                                                                                                                                                                                                                                                                    |
|                                 |                                                                                                                                                                                                                                                                                                                                                                                                                                                                                                                                                                                                                                                                                                                                                                                                                                                                         |

SCHOLARONE™  
Manuscripts



1  
2  
3 **Burnout, Wellbeing and Defensive Medical Practice amongst Obstetricians and**  
4  
5 **Gynaecologists in the United Kingdom: Cross-sectional survey study**  
6

7 Tom Bourne, Harsha Shah, Nora Falconieri, Dirk Timmerman, Christoph Lees, Alison Wright,

8  
9 Mary-Ann Lumsden, Lesley Regan, Ben Van Calster

10  
11  
12 Department of Obstetrics and Gynaecology, Queen Charlotte's and Chelsea Hospital,  
13 Imperial College, London, W12 0HS, United Kingdom, Tom Bourne  
14 Professor of Practice  
15

16  
17 Department of Obstetrics and Gynaecology, Queen Charlotte's and Chelsea Hospital,  
18 Imperial College, London, W12 0HS, United Kingdom, Harsha Shah  
19 Clinical Research Fellow  
20

21 KU Leuven, Department of Development & Regeneration, Herestraat 49 box 805, 3000  
22 Leuven, Belgium, Nora Falconieri  
23 PhD Student  
24

25  
26 KU Leuven, Department of Development & Regeneration, Herestraat 49 box 805, 3000  
27 Leuven, Belgium, Dirk Timmerman  
28 Professor of Obstetrics and Gynaecology  
29

30  
31 Department of Obstetrics and Gynaecology, Queen Charlotte's and Chelsea Hospital,  
32 Imperial College, London, W12 0HS, United Kingdom, Christoph Lees  
33 Professor of Obstetrics  
34

35  
36 Department of Obstetrics and Gynaecology, Royal Free Hospital, London, NW3 2QG, United  
37 Kingdom, Alison Wright  
38 Consultant Obstetrician and Gynaecologist

39  
40 Department of Obstetrics and Gynaecology, University of Glasgow, G12 8QQ, United  
41 Kingdom, Mary-Ann Lumsden  
42 Professor of Medical Education and Gynaecology  
43

44  
45 Department of Obstetrics and Gynaecology, St Mary's Hospital, Imperial College NHS Trust,  
46 London, W2 1NY, United Kingdom, Lesley Regan  
47 Professor of Obstetrics and Gynaecology

48  
49 KU Leuven, Department of Development & Regeneration, Herestraat 49 box 805, 3000  
50 Leuven, Belgium, Ben Van Calster  
51 Professor of Statistics

52  
53 Correspondence to: Tom Bourne [t.bourne@imperial.ac.uk](mailto:t.bourne@imperial.ac.uk)

54  
55 **Keywords: Burnout, Defensive Practice, Doctors, Patient safety**

56  
57 **Manuscript word count: 3765**  
58  
59  
60

## Abstract

**Objectives:** To determine the prevalence of burnout in doctors practising obstetrics and gynaecology, and assess the association with defensive medical practice and self-reported wellbeing.

**Design:** Nationwide online cross-sectional survey study; December 2017-March 2018.

**Setting:** Hospitals in the United Kingdom

**Participants:** 5661 practising Obstetrics and Gynaecology consultants, specialty and associate specialist doctors and trainees registered with the Royal College of Obstetricians and Gynaecologists

**Primary and Secondary Outcome Measures:** Prevalence of burnout using the Maslach Burnout Inventory and defensive medical practice (avoiding cases or procedures, overprescribing, over-referral) using a 12-item questionnaire. The odds ratios of burnout with defensive medical practice and self-reported wellbeing.

**Results:** 3102/5661 doctors (55%) completed the survey. 3073/3102 (99%) met the inclusion criteria (1462 consultants, 1357 trainees and 254 specialty and associate specialist doctors). 1116/3073 (36%) doctors met the burnout criteria, with levels highest amongst trainees (580/1357 [43%]). 258/1116 (23%) doctors with burnout reported increased defensive practice compared to 142/1957 (7%) without (adjusted odds ratio 4.35, 95% CI 3.46 to 5.49). Odds ratios of burnout with wellbeing items varied between 1.38 and 6.37, and were highest for anxiety (3.59, 95% CI 3.07 to 4.21), depression (4.05, 95% CI 3.26 to 5.04), and suicidal thoughts (6.37, 95% CI 3.95 to 10.7). In multivariable logistic regression, being of younger age, white or 'other' ethnicity, and graduating with a medical degree from the UK or Ireland had the strongest associations with burnout.

1  
2  
3 **Conclusions:** High levels of burnout were observed in obstetricians and gynaecologists and  
4  
5 particularly amongst trainees. Burnout was associated with both increased defensive  
6  
7 medical practice and worse doctor wellbeing. These findings have implications for the  
8  
9 wellbeing and retention of doctors as well as the quality of patient care, and may help to  
10  
11 inform the content of future interventions aimed at preventing burnout and improving  
12  
13 patient safety.  
14  
15  
16  
17  
18  
19  
20  
21  
22  
23  
24  
25  
26  
27  
28  
29  
30  
31  
32  
33  
34  
35  
36  
37  
38  
39  
40  
41  
42  
43  
44  
45  
46  
47  
48  
49  
50  
51  
52  
53  
54  
55  
56  
57  
58  
59  
60

For peer review only

### Article Summary - Strengths and limitations of this study

- First nationwide survey in the United Kingdom which examines the prevalence of burnout as well as its relationship to defensive medical practice and self-reported wellbeing
- This study includes a large number of doctors working in obstetrics and gynaecology and has a good response rate
- Use of the Maslach Burnout Inventory, a widely available and validated tool for measuring burnout amongst doctors allows for comparison with other research in this field
- The response rate of 54.8% is a limitation which introduces the possibility of selection bias; this must be considered when interpreting the findings

## Introduction

Doctor burnout and mental wellbeing is an important concern internationally(1-5) because of the high reported prevalence(6) and serious consequences for both staff and patients.(7) Burnout syndrome, which is a response to prolonged exposure to occupational stress, is characterised by three dimensions: emotional exhaustion, depersonalisation and reduced personal accomplishment.(8) International studies have shown that burnout is nearly twice as common amongst doctors compared with other healthcare workers.(7) A recent survey by the General Medical Council reported that 24% of trainees and 21% of trainers from across the United Kingdom (UK) described 'feeling burnt out' based on self-reported symptoms.(9) The consequences of burnout amongst doctors have been investigated primarily in the United States (USA)(10) with relatively few large studies conducted in Europe(11-16) and Asia(17, 18) to validate these findings internationally. These include a negative impact on health including higher rates of substance abuse, depression, suicide and a poorer quality of life.(19, 20) Moreover, burnout in doctors has a significant impact on the productivity of healthcare organisations, intentions to leave medical practice, and both the quality and safety of patient care.(21-25) At present, it is unclear if these findings and the proposed interventions can be extrapolated to the United Kingdom (UK) due to a paucity of data on doctor burnout in this setting.(26, 27)

Evidence from studies in Europe(15, 28) and the USA(2) suggest that burnout may be experienced by up to half of doctors in obstetrics and gynaecology (O&G),(29, 30) and that the prevalence of burnout in O&G is one of the highest of any specialty. This may be related to the high-acuity and rapid turnover of patients associated with O&G (31). Burnout is also associated with increased job turnover and reduced workforce retention.(32, 33) Furthermore, a key consequence of doctor burnout is the impact on patient care. A recent meta-analysis suggested burnt out doctors are twice as likely to be involved in patient safety

1  
2  
3 incidents and deliver a lower quality of patient care.(34) This is a significant issue in O&G, a  
4 specialty already associated with high levels of litigation(35) with obstetric claim settlements  
5 costing the NHS over £500 million annually.(36) These high litigation rates are partly  
6 attributable to the large number of safety incidents and complaints(37, 38) and a parallel  
7 culture of intolerance when errors are made. The overall impact of this 'complaints culture'  
8 on doctors is substantial.(39) A UK wide study on the impact of complaints on doctor welfare  
9 demonstrated that they are associated with an increased risk of depression, anxiety and  
10 suicidal ideation as well as increased defensive practice.(40-42) Defensive medical  
11 practice (DMP) is defined as a doctor's deviation from standard practice in response to  
12 complaints or criticism(43) which can potentially harm patients as a result of either over-  
13 investigation and treatment or because clinicians avoid involvement in difficult cases.(35) A  
14 small study of DMP among UK doctors demonstrated that 26.4% of O&G doctors report  
15 practising some form of defensive medicine(35, 43). Although the overall effect and cost of  
16 the practice of defensive medicine has not been established in the UK, it is thought to  
17 represent a highly significant strain on healthcare resources and in the USA, it is estimated  
18 to cost \$46 billion annually.(44)

19  
20  
21  
22  
23  
24  
25  
26  
27  
28  
29  
30  
31  
32  
33  
34  
35  
36  
37  
38  
39  
40  
41 There has been great focus by the UK government through initiatives such as 'The Maternal  
42 and Neonatal Health Safety Collaborative'(45) to implement strategies which aim to improve  
43 maternity safety and outcomes. A facet of this work involves 'understanding the culture' of  
44 the O&G workforce.(45) However, to our knowledge, there is currently no quantitative data  
45 relating to burnout amongst doctors working in O&G in the UK to inform policy and  
46 potential interventions in relation to NHS workforce sustainability (46) as well as any  
47 impacts on the quality of patient care (6). Thus, there is a clear need to identify the  
48 prevalence and factors associated with burnout amongst doctors. We conducted a  
49 nationwide cross-sectional survey study to assess burnout, defensive medical practice and  
50  
51  
52  
53  
54  
55  
56  
57  
58  
59  
60

1  
2  
3 associated personal and work factors in O&G doctors in the UK. The aims were firstly to  
4 ascertain the prevalence of burnout in the cohort, secondly to determine the levels of DMP  
5 and doctor wellbeing and explore their relationship with burnout. Finally, we aimed to  
6 explore the relationships between age, gender, ethnicity, doctor seniority, and both burnout  
7 and DMP.  
8  
9  
10  
11  
12  
13  
14  
15  
16

## 17 **Methods**

18 All consultants (equivalent to an attending physician in the USA), specialty and specialty  
19 associate (SAS) doctors (doctors who have completed specialist training but do not have a  
20 staff position) and trainees (equivalent to a resident or fellow in the USA) working in  
21 Obstetrics and Gynaecology in the United Kingdom and registered with the Royal College of  
22 Obstetricians and Gynaecologists (RCOG) were invited to participate in this study between  
23 December 2017 and March 2018. Registration with the RCOG is mandatory for all  
24 obstetricians and gynaecologists practicing in the UK. Doctors were sent an email containing  
25 information describing the study and a link to an encrypted online questionnaire. We made  
26 it clear to the participants in the invitation email that their participation was voluntary and  
27 that responses would be both anonymous and untraceable. Informed consent was implied  
28 upon return of the survey. Unique surveys were created for each of the grades described  
29 and sent as part of the annual RCOG Workforce and Welfare survey that collects data about  
30 doctors' clinical practice and working patterns. During the survey period, 4 reminders were  
31 sent out. All actively practising doctors were included as well as doctors who were on sick  
32 leave, maternity leave, or suspended from practice. Exclusion criteria included doctors who  
33 are fully retired, on a career break, in between jobs, not working in the UK at the time of the  
34 survey or those who are currently not employed.  
35  
36  
37  
38  
39  
40  
41  
42  
43  
44  
45  
46  
47  
48  
49  
50  
51  
52  
53  
54  
55  
56  
57  
58

## 59 **The Survey**

1  
2  
3 We used a cross-sectional survey design with three participant groups: consultants, SAS  
4  
5 doctors and trainees. We estimate that the time taken to complete the questionnaire was  
6  
7 20 minutes.  
8  
9

10  
11 All participants were asked to provide information on demographic variables, including age,  
12  
13 gender, ethnicity (Office of National Statistics classification(47)), relationship status and if  
14  
15 they have children. In addition, they were asked about some job and organisational factors  
16  
17 such as rota design and career or retirement plans which were tailored to the participant  
18  
19 group. These parameters were chosen based on previous studies suggesting that they have  
20  
21 an association with burnout.(48) The main outcomes and measures – the Maslach Burnout  
22  
23 Inventory Human Services Survey for Medical Personnel(49) (MBI), defensive medical  
24  
25 practice questionnaire and questions concerning wellbeing were the same for all groups. A  
26  
27 copy of the survey (excluding the copyright restricted MBI) can be found in eMethods in the  
28  
29 Supplement.  
30  
31  
32  
33  
34  
35  
36

## 37 **Main Outcomes and Measures**

### 38 **Symptoms of Burnout**

39  
40 We measured burnout using the Maslach Burnout Inventory Human Services Survey for  
41  
42 Medical Personnel(49) (MBI), a validated 22-item tool to identify and characterise burnout.  
43  
44 The MBI has three subscales to evaluate the 3 domains of burnout: emotional exhaustion  
45  
46 (EE), depersonalisation (DP), and low personal accomplishment (PA). As in previous studies  
47  
48 and according to convention,(10, 48, 49) burnout was defined as high EE (scores of 27 or  
49  
50 greater; possible score range from 0-54), and/or high DP (scores of 10 or greater; possible  
51  
52 score range from 0-30) as opposed to a total score. The PA score was also measured with  
53  
54 low PA defined as scores of 33 or lower (possible score range from 0-48) but this was not  
55  
56 used as a criterion for burnout in line with previous published work on the subject.(48)  
57  
58  
59  
60



### **Defensive Medical Practice**

DMP was assessed using a 12-item questionnaire which has previously been developed and described.<sup>(40, 42)</sup> Items are measured on a 5-point Likert scale (ranging from never to often). Nine items quantify 'hedging' behaviour, which is when doctors are overcautious, leading to overprescribing or over-investigation. 3 items quantify 'avoidance' behaviour, which includes not taking on complicated patients and avoiding certain procedures or more difficult cases. We confirm this factor structure in eMethods in the Supplement. Consistent with previous work, we defined elevated hedging behaviour as a score of 13 or more (possible score range from 0-36), and elevated avoidance behaviour as a score of 5 or more (possible score range from 0-12).<sup>(40)</sup> We defined any DMP as having elevated levels of avoidance and/or hedging.

### **Doctor Wellbeing**

Doctors were asked to self-report on the presence or absence (yes or no) of a variety of common medical symptoms and conditions including, cardiovascular problems, gastrointestinal problems, headaches, minor colds, recurring respiratory infections, depression, anxiety, anger and irritability, suicidal thoughts, sleep problems, relationship problems, and alcohol/drug misuse.

### **Statistical Analyses**

Spearman correlations between the MBI and DMP subscales and DMP were calculated. In order to investigate the association between burnout, DMP, and wellbeing, we calculated odds ratios based on univariable logistic regression with Firth bias correction.

Multivariable logistic regression with Firth bias correction was used to investigate the association between demographic variables and burnout, with results reported as adjusted

odds ratios and visualised with a nomogram. The predictors of burnout in this analysis were age, gender, ethnicity, grade, having children, current relationship, medical degree (MD) origin (UK or Ireland vs. other), and work status (full time vs. less than full time). A similar multivariable analysis was performed with DMP as the dependent variable. For this model, the same predictors were used, with burnout added as an additional predictor.

For the logistic regression analyses, missing values were singly imputed using the method of fully conditional specification based on the abovementioned list of predictors, the MBI subscales (as numerical scores), and the DMP subscales (as numerical scores).

R version 3.5.0 was used for the statistical analysis.

### **Patient and Public Involvement**

This research was designed and conducted without patient and public involvement.

## **Results**

### **Respondent Characteristics**

The survey was sent to a total of 5661 doctors. The overall response rate was 54.8% (3102/5661). We received questionnaires from 1481 consultants (53% of 2786 consultants contacted), 1364 trainees (57% of 2375 trainees contacted), and 257 SAS doctors (51% of 500 contacted). Of these, 1462 consultants, 1357 trainees, and 254 SAS doctors were actively practising and included in the analysis. The mean age was 50 years for consultants, 33 years for trainees, and 47 years for SAS doctors (Table 1). A majority of doctors were female (58% of the consultants, 80% of the trainees, 68% of the SAS doctors). Consultants (57%) and trainees (64%) were predominantly white, whereas SAS doctors were most often of Asian ethnicity (42%). Descriptive statistics by demographic variables are presented in Table 2. Information on missing data is presented in eTable 1 in the Supplement.

1  
2  
3 We were unable to reliably check if our sample for all doctors was representative of the  
4  
5 entire population to whom the study survey was sent with regards to age, gender and  
6  
7 ethnicity as the RCOG do not hold a centralised database of these variables for all doctors  
8  
9 against which to compare our data. However, the RCOG sent a different survey (Training  
10  
11 Evaluation Form (TEF)) to 1956 trainees in January 2018, which was responded to by 1754  
12  
13 trainees (89.7%) (eTable 2 in the Supplement).<sup>(50)</sup> When comparing our data to this survey,  
14  
15 we found that our trainee sample was comparable in terms of gender (79.1% females in the  
16  
17 TEF database compared to 79.8% in our cohort). Furthermore our study population had  
18  
19 similar numbers of trainees in the 20-29 and 30-39 age ranges (28.3% and 62.3%  
20  
21 respectively in the TEF database compared to 24.8% and 66.1% respectively in our  
22  
23 database). Our trainee cohort consisted of more doctors in the 40-59 age range (9.1%  
24  
25 compared to 6.1% in the TEF database) which may be accounted for by missing data in the  
26  
27 TEF database. In terms of ethnicity, our sample was also comparable for all groups.  
28  
29  
30  
31  
32  
33  
34

### 35 **Burnout**

36  
37 Regarding the MBI, the percentage of participants meeting the criteria for burnout was 36%  
38  
39 overall (1116/3073; 95% confidence interval (CI) 35% to 38%); 31% for consultants  
40  
41 (460/1462; 95% CI 29% to 34%), 43% for trainees (580/1364; 95% CI 40% to 45%), and 30%  
42  
43 for SAS doctors (76/254; 95% CI 25% to 36%) (Table 1 and eFigure 1 in the Supplement).  
44  
45 Between 26% and 32% met the criteria for high EE, between 12% and 29% met the criteria  
46  
47 for high DP, and between 26% and 39% met the criteria for low PA. The EE and DP scales had  
48  
49 a Spearman correlation of 0.57, whereas both subscales correlated negatively with PA (-0.30  
50  
51 and -0.34, respectively) (eTable 3).  
52  
53  
54  
55  
56

### 57 **Defensive Medical Practice**

1  
2  
3 Increased DMP, according to our criteria, was observed in 13% overall (400/3073); 16% of  
4  
5 consultants (231/1462), 11% of trainees (149/1364), and 8% of SAS doctors (20/254).

6  
7 Between 4% and 9% met our criteria for increased avoidance, and between 4% and 11% met  
8  
9 our criteria for increased hedging. These subscales had a Spearman correlation of 0.41  
10  
11 (eTable 3 and eFigure 1 in the Supplement).

12  
13  
14  
15  
16 Of all participants who met the criteria for burnout, 23% met the criteria for increased DMP  
17  
18 (258/1116) (Table 3). Of participants who did not meet the criteria for burnout, 7% reported  
19  
20 increased DMP (142/1957). The crude odds ratio (OR) was 3.84 (95% CI 3.08 to 4.79). The  
21  
22 relationship was similar for all categories of doctors, and was observed for avoidance as well  
23  
24 as hedging behaviour (Table 3 and eTable 4 in the supplement).

### 30 **Doctor Wellbeing**

31  
32 Doctors with burnout had a higher prevalence of self-reported medical illness (Table 4).  
33  
34 Highest odds ratios were observed for suicidal thoughts (6.37, 95% CI 3.95 to 10.7),  
35  
36 depression (4.05, 95% CI 3.26 to 5.04), anxiety (3.59, 95% CI 3.07 to 4.21), anger/irritability  
37  
38 (3.51, 95% CI 3.00 to 4.10), sleep problems or insomnia (3.15, 95% CI 2.70 to 3.67) and  
39  
40 substance misuse (2.57, 95% CI 1.71-3.89). 13.5% (n=416) of all doctors reported depression,  
41  
42 but this was 7.4% for doctors without burnout and 24.4% for doctors with burnout.  
43  
44 Furthermore, 2.9% (n=90) of all doctors reported suicidal thoughts, 1.0% among doctors  
45  
46 without and 6.3% among doctors with burnout. The OR was lowest for cardiovascular  
47  
48 problems (1.38, 95% CI 1.07 to 1.78).  
49  
50  
51  
52  
53

### 54 **Risk factors and correlates**

55  
56 Results of the multivariable models are presented in Table 5 and eFigure 2 in the  
57  
58 Supplement. Age, ethnicity, and origin of MD degree were most strongly related to burnout.  
59  
60

1  
2  
3 The older the doctor, the lower the reported level of burnout (adjusted OR per 5 years 0.92,  
4 95% CI 0.87-0.98) and doctors of white and 'other' ethnicity reported higher levels of  
5 burnout (41% and 48% respectively) than doctors of other ethnicities (28 to 34%). Doctors  
6 with a medical degree from the UK or Ireland also reported higher levels of burnout (42% vs  
7 25%, adjusted OR 1.74, 95% CI 1.41 to 2.16).  
8  
9  
10  
11  
12  
13  
14  
15  
16

17 Regarding any DMP, burnout was the strongest predictor, followed by age, type of doctor,  
18 and ethnicity. The adjusted OR of burnout to predict increased DMP was 4.35 (95% CI 3.46  
19 to 5.49). Consultants, doctors of mixed ethnicity, and to a lesser extent older doctors,  
20 reported the highest levels of DMP.  
21  
22  
23  
24  
25  
26  
27

## 28 Discussion

29 In this large nationwide study, we have shown that just under half of trainees and a third of  
30 consultants and SAS doctors working in obstetrics and gynaecology in the UK suffer from  
31 burnout using the MBI scoring system. Furthermore, our data suggest that burnout is  
32 associated with higher levels of defensive medical practice, and with poorer mental and  
33 physical wellbeing.  
34  
35  
36  
37  
38  
39  
40  
41  
42

43 The overall prevalence of burnout in this study is consistent with smaller international  
44 studies conducted within obstetrics and gynaecology (28, 29, 51) but lower than reported in  
45 the United States. (2, 52, 53) This may be explained by differences in the way burnout has  
46 been measured, the small number of subjects included in some studies, differences in  
47 healthcare systems as well as medical training, and the hours of work in the UK which are  
48 restricted by the European Working Time Directive. A lack of personal accomplishment and  
49 emotional exhaustion were the most commonly endorsed subscales, followed by  
50 depersonalisation. The particularly high levels of burnout amongst younger doctors, of  
51  
52  
53  
54  
55  
56  
57  
58  
59  
60

1  
2  
3 whom the majority are trainees, may provide insights into a recent RCOG national training  
4 and workforce report.(54) In this, nine out of ten O&G trainees reported feeling low in  
5 mood, depressed or anxious since starting specialty training(54). In keeping with this finding,  
6  
7 and with a number of American studies,(48, 55) our data indicates that burnout is associated  
8  
9 with a negative impact on doctor wellbeing and is strongly associated with depression,  
10  
11 anxiety and suicidal thoughts.  
12  
13  
14  
15  
16  
17

18  
19 Our study reported a particularly strong relationship between burnout and suicidal  
20 thoughts; worryingly, suicidal ideation has been shown to be strongly associated with actual  
21 suicide attempts and death (56). Furthermore, suicide rates in doctors are known to be  
22 much higher than for the general population(57). A study of surgeons in the USA (58) found  
23 the prevalence of suicidal ideation in this group to be 6.3%; although this is higher than the  
24 prevalence in this study (2.9%), we found the association between burnout and suicidal  
25 ideation to be higher (odds ratio, 6.37 versus 1.910 (58)) in our cohort. This may reflect a  
26 vulnerability amongst doctors working in O&G compared to other specialties(28, 29) or the  
27 differences in healthcare services and culture internationally.  
28  
29  
30  
31  
32  
33  
34  
35  
36  
37  
38  
39  
40

41 Studies in the USA have indicated an association between burnout and increased workforce  
42 turnover(59) which has both financial implications and an impact on healthcare organisation  
43 productivity. The RCOG national workforce report(54) has reported that three quarters of  
44 trainees have considered leaving O&G practice. In our study, as well as the highest  
45 prevalence of burnout amongst trainees, almost a fifth of trainees reported depression and  
46 over a third reported anxiety. These symptoms were markedly more prevalent in the cohort  
47 with burnout and depression has been shown to be independently associated with an  
48 increased self-reported likelihood of leaving practice amongst surgeons.(60) Better  
49 understanding the relationship between burnout, wellbeing and staff turnover intentions is  
50  
51  
52  
53  
54  
55  
56  
57  
58  
59  
60

1  
2  
3 of great importance to ensure retention of the workforce going forward. This knowledge will  
4  
5 also help to inform the content of interventions aimed at identifying and preventing  
6  
7 burnout, and improving the wellbeing and retention of doctors early in their careers (61).

8  
9  
10 The majority of interventions proposed to date have been individual-focused strategies  
11  
12 which include mindfulness(62), personal coping strategies and exercise (63), or some  
13  
14 combination of these. However, a recent meta-analysis of interventions to reduce doctor  
15  
16 burnout found that organisation-directed interventions (such as reducing workload,  
17  
18 changing rota/shift patterns, or group sessions to enhance teamwork) had a more significant  
19  
20 effect on reducing burnout than individual approaches alone(23). This highlights the  
21  
22 importance of implementing organisational strategies(64, 65) along with continual  
23  
24 assessment of burnout, to develop a healthy workplace environment to effectively tackle  
25  
26 this problem(5).  
27  
28  
29  
30  
31

32  
33 Our finding that burnout is associated with increased DMP supports the concern that doctor  
34  
35 burnout impacts the quality of patient care.(34) In 2010, Shanafelt et al. al(19) showed that  
36  
37 burnout is an independent predictor of self-reported perceived major medical errors. Our  
38  
39 study shows that consultants with burnout are three times more likely to report both  
40  
41 avoidance (avoiding cases or procedures) and hedging (overprescribing or over-referral)  
42  
43 which may have significant and serious consequences on patient care. This may be because  
44  
45 consultants are less 'protected' than trainees in terms of litigation as they take ultimate  
46  
47 responsibility for a patient's care. Furthermore, due to their seniority, they are likely to have  
48  
49 experienced more complaints or adverse events during their careers, which have been  
50  
51 shown to be associated with DMP(42). The observation in our study that age is inversely  
52  
53 associated with burnout is also in keeping with other studies.(66) This may be explained by  
54  
55 the fact that doctors who remain within the specialty are inherently more resilient, and that  
56  
57 those more affected by burnout may be accounted for in the attrition rate from the  
58  
59  
60

1  
2  
3 specialty(67). It has also been suggested that the lower rate of burnout seen in more senior  
4  
5 doctors is because they may have a better work-life balance and career (67, 68). A further  
6  
7 noteworthy association in our cohort was that after controlling for other confounding  
8  
9 variables, doctors from ethnic minorities were less likely to experience burnout. Similar  
10  
11 findings have been reported in studies of trainees and medical students in the USA(69-71)  
12  
13 however the reasons for this are unknown. It has been proposed that that these differences  
14  
15 may be explained by differences in upbringing and life stressors, which may make doctors  
16  
17 from ethnic minorities more resilient(69). Consistent with this, we found that doctors who  
18  
19 graduated in the UK or Ireland are almost twice as likely to experience burnout.  
20  
21  
22

23  
24  
25 Strengths and weaknesses of our study are important to consider in contrast with other  
26  
27 research on the prevalence of burnout in doctors. A strength of the study is that it is a  
28  
29 nationwide survey which includes a large number of doctors and is the first study to our  
30  
31 knowledge that seeks to explore the relationship between burnout (using a validated tool,  
32  
33 the MBI) and defensive medical practice. There were several limitations to the present  
34  
35 study. Firstly, although the overall response rate was only 54.8% which is a relatively high  
36  
37 response rate for a survey study of this type, it still introduces the possibility of selection  
38  
39 bias, which must be considered when interpreting the findings. We believe however that the  
40  
41 response rate quoted is the minimum rate and is likely to under-report the response rate  
42  
43 from practising clinicians (eDiscussion in the Supplement). Secondly, it is plausible that  
44  
45 individuals most affected by burnout may have avoided engaging with the survey and  
46  
47 conversely those least impacted may not have seen its value which could bias the results.  
48  
49  
50 Thirdly, we asked doctors to self-report on medical conditions including depression and  
51  
52 anxiety and the questionnaire used to assess DMP, although used in previous studies (40-  
53  
54 42), has not been formally validated. Finally, a limitation of a cross-sectional survey study is  
55  
56  
57  
58  
59  
60



1  
2  
3 that it cannot take into account variability of symptoms over time, which may be influenced  
4  
5 by other factors such as time of the year and other personal factors.  
6  
7  
8  
9

### 10 **Conclusions**

11  
12 Our nationwide study reports high levels of burnout amongst obstetricians and  
13  
14 gynaecologists in the UK, and that burnout is more prevalent in younger doctors who have  
15  
16 trained in the UK. Furthermore, our data suggest that burnout is strongly associated with  
17  
18 anxiety, depression, suicidal thoughts and substance misuse. This highlights the impact of  
19  
20 burnout on the efficiency and sustainability of the O&G medical workforce, which confirms  
21  
22 the need to regularly assess and mitigate burnout in doctors. We have also observed an  
23  
24 association between burnout and defensive medical practice, which has implications for the  
25  
26 quality and safety of patient care being delivered as well as the wellbeing and retention of  
27  
28 staff in the NHS. Ultimately, cultivating a greater understanding of doctor burnout and its  
29  
30 implications has strategic importance for the sustainability of the NHS workforce and will  
31  
32 add to the body of evidence required to improve productivity and patient safety outcomes  
33  
34 more broadly across the UK.  
35  
36  
37  
38  
39  
40  
41  
42  
43  
44  
45  
46  
47  
48  
49  
50  
51  
52  
53  
54  
55  
56  
57  
58  
59  
60

## Footnotes

**Author Contributions:** TB had full access to all of the data in the study and takes responsibility for the integrity of the data and the accuracy of the data analysis.

Concept and design: TB, CL, AW, LR

Acquisition, analysis, and interpretation of data: TB, HS, NF, DT, CL, AW, MAL, LR, BVC

Drafting of the manuscript: TB, HS, BVC

Critical revision of the manuscript for important intellectual content: TB, HS, NF, DT, CL, AW, MAL, LR, BVC

Statistical analysis: NF, BVC

Obtained funding: TB

TB is the guarantor and attests that all listed authors meet authorship criteria and that no others meeting the criteria have been omitted.

**Acknowledgements:** Victoria Bytel contributed to conduct of the study and facilitated data collection.

**Funding:** The Royal College of Obstetricians and Gynaecologists supported the costs of using the Maslach Burnout Inventory. The study received no additional funding. The funders had no role in the study design; collection, management, analysis, and interpretation of the data; preparation, writing, review, or approval of the manuscript; and decision to submit the manuscript for publication. All authors had full access to all of the data in the study, can take responsibility for the integrity of the data, and had final responsibility for the decision to submit for publication.

**Competing interests:** All authors have completed the ICMJE uniform disclosure form at [www.icmje.org/coi\\_disclosure.pdf](http://www.icmje.org/coi_disclosure.pdf) and declare: no support from any organisation for the

1  
2  
3 submitted work; no financial relationships with any organisations that might have an  
4  
5 interest in the submitted work in the previous three years; no other relationships or  
6  
7 activities that could appear to have influenced the submitted work.  
8  
9

10  
11  
12 **Ethical Approval:** The survey was sent to doctors registered with the Royal College of  
13  
14 Obstetricians and Gynaecologists via their email database. The Chair of the RCOG Ethics  
15  
16 Committee (Vivienne Nathanson) reviewed the study proposal and confirmed that ethical  
17  
18 approval was not required. This was due to the fact that the data collected about doctors  
19  
20 was via an encrypted online questionnaire and participants were informed that their  
21  
22 participation was voluntary and that responses would be both anonymous and untraceable.  
23  
24 Informed consent was implied on return of the survey.  
25  
26  
27  
28  
29

30  
31 **Exclusive Licence:** The Corresponding Author has the right to grant on behalf of all authors  
32  
33 and does grant on behalf of all authors, an exclusive licence on a worldwide basis to the BMJ  
34  
35 Publishing Group Ltd to permit this article (if accepted) to be published in BMJ editions and  
36  
37 any other BMJ PGL products and sublicences such use and exploit all subsidiary rights, as set  
38  
39 out in our licence.  
40  
41  
42

43  
44 **Transparency:** The lead author (TB) affirms that the manuscript is an honest, accurate, and  
45  
46 transparent account of the study being reported; that no important aspects of the study  
47  
48 have been omitted; and any discrepancies from the study as planned have been explained.  
49  
50  
51

52  
53 **Data sharing statement:** No additional data is available at present. Any queries to be  
54  
55 submitted to the corresponding author at [t.bourne@imperial.ac.uk](mailto:t.bourne@imperial.ac.uk).  
56  
57  
58  
59  
60

## References

1. Arigoni F, Bovier PA, Sappino A-P. Trend of burnout among Swiss doctors. *Swiss Med Wkly*. 2010;140:w13070.
2. Gabbe SG, Melville J, Mandel L, Walker E. Burnout in chairs of obstetrics and gynecology: diagnosis, treatment, and prevention. *Am J Obstet Gynecol*. 2002;186(4):601-12.
3. Wang Z, Xie Z, Dai J, Zhang L, Huang Y, Chen B. Physician burnout and its associated factors: a cross-sectional study in Shanghai. *J Occup Health*. 2014;56(1):73-83.
4. Klein J, Grosse Frie K, Blum K, von dem Knesebeck O. Burnout and perceived quality of care among German clinicians in surgery. *Int J Qual Health Care*. 2010;22(6):525-30.
5. Montgomery A, Panagopoulou E, Esmail A, Richards T, Maslach C. Burnout in healthcare: the case for organisational change. *BMJ*. 2019;366:l4774.
6. Johnson J, Bu C, Panagioti M. Tackling burnout in UK trainee doctors is vital for a sustainable, safe, high quality NHS. *BMJ*. 2018;362:k3705.
7. Shanafelt TD, Hasan O, Dyrbye LN, Sinsky C, Satele D, Sloan J, et al. Changes in Burnout and Satisfaction With Work-Life Balance in Physicians and the General US Working Population Between 2011 and 2014. *Mayo Clin Proc*. 2015;90(12):1600-13.
8. Maslach C, Schaufeli WB, Leiter MP. Job burnout. *Annu Rev Psychol*. 2001;52:397-422.
9. GMC. General Medical Council. National training surveys 2018: initial findings report. <https://www.gmc-uk.org/about/what-we-do-and-why/data-and-research/national-training-surveys-reports>. 2018.
10. Rotenstein LS, Torre M, Ramos MA, Rosales RC, Guille C, Sen S, et al. Prevalence of Burnout Among Physicians: A Systematic Review. *JAMA*. 2018;320(11):1131-50.
11. Wurm W, Vogel K, Holl A, Ebner C, Bayer D, Morkl S, et al. Depression-Burnout Overlap in Physicians. *PloS one*. 2016;11(3):e0149913.
12. Vandebroek S, Van Gerven E, De Witte H, Vanhaecht K, Godderis L. Burnout in Belgian physicians and nurses. *Occup Med (Lond)*. 2017;67(7):546-54.
13. Pedersen AF, Sorensen JK, Bruun NH, Christensen B, Vedsted P. Risky alcohol use in Danish physicians: Associated with alexithymia and burnout? *Drug Alcohol Depend*. 2016;160:119-26.
14. Pantenburg B, Lupp M, Konig HH, Riedel-Heller SG. Burnout among young physicians and its association with physicians' wishes to leave: results of a survey in Saxony, Germany. *J Occup Med Toxicol*. 2016;11:2.
15. Ruitenburg MM, Frings-Dresen MH, Sluiter JK. The prevalence of common mental disorders among hospital physicians and their association with self-reported work ability: a cross-sectional study. *BMC Health Serv Res*. 2012;12:292-8.

16. Baas MAM, Scheepstra KWF, Stramrood CAI, Evers R, Dijkman LM, van Pampus MG. Work-related adverse events leaving their mark: a cross-sectional study among Dutch gynecologists. *BMC Psychiatry*. 2018;18(1):73.
17. Li H, Zuo M, Gelb AW, Zhang B, Zhao X, Yao D, et al. Chinese Anesthesiologists Have High Burnout and Low Job Satisfaction: A Cross-Sectional Survey. *Anesth Analg*. 2018;126(3):1004-12.
18. Wu H, Liu L, Wang Y, Gao F, Zhao X, Wang L. Factors associated with burnout among Chinese hospital doctors: a cross-sectional study. *BMC Public Health*. 2013;13:786.
19. Shanafelt TD, Balch CM, Bechamps G, Russell T, Dyrbye L, Satele D, et al. Burnout and medical errors among American surgeons. *Ann Surg*. 2010;251(6):995-1000.
20. Shanafelt TD, Gradishar WJ, Kosty M, Satele D, Chew H, Horn L, et al. Burnout and career satisfaction among US oncologists. *J Clin Oncol*. 2014;32(7):678-86.
21. Dewa CS, Loong D, Bonato S, Trojanowski L. The relationship between physician burnout and quality of healthcare in terms of safety and acceptability: a systematic review. *BMJ Open*. 2017;7(6):e015141.
22. Hall LH, Johnson J, Watt I, Tsipa A, O'Connor DB. Healthcare staff wellbeing, burnout, and patient safety: A systematic review. *PLoS One*. 2016;11(7):e0159015.
23. Panagioti M, Panagopoulou E, Bower P, Lewith G, Kontopantelis E, Chew-Graham C, et al. Controlled Interventions to Reduce Burnout in Physicians: A Systematic Review and Meta-analysis. *JAMA Intern Med*. 2017;177(2):195-205.
24. Salyers MP, Bonfils KA, Luther L, Firmin RL, White DA, Adams EL, et al. The Relationship Between Professional Burnout and Quality and Safety in Healthcare: A Meta-Analysis. *J Gen Intern Med*. 2016:1-8.
25. Hall LH, Johnson J, Heyhoe J, Watt I, Anderson K, O'Connor DB. Exploring the impact of primary care physician burnout and wellbeing on patient care: A focus group study [published online ahead of print (Nov 17)]. *J Patient Saf*. 2017.
26. Rimmer A. Employers must tackle high level of burnout among trainees, says GMC. *BMJ*. 2018;362:k3018.
27. Imo UO. Burnout and psychiatric morbidity among doctors in the UK: a systematic literature review of prevalence and associated factors. *BJPsych Bull*. 2017;41(4):197-204.
28. Castelo-Branco C, Figueras F, Eixarch E, Quereda F, Cancelo MJ, Gonzalez S, et al. Stress symptoms and burnout in obstetric and gynaecology residents. *BJOG*. 2007;114(1):94-8.
29. Moradi Y, Baradaran HR, Yazdandoost M, Atrak S, Kashanian M. Prevalence of Burnout in residents of obstetrics and gynecology: A systematic review and meta-analysis. *Med J Islam Repub Iran*. 2015;29(4):235-.
30. Dyrbye LN, Burke SE, Hardeman RR, et al. Association of clinical specialty with symptoms of burnout and career choice regret among us resident physicians. *JAMA*. 2018;320(11):1114-30.

- 1  
2  
3  
4  
5  
6  
7  
8  
9  
10  
11  
12  
13  
14  
15  
16  
17  
18  
19  
20  
21  
22  
23  
24  
25  
26  
27  
28  
29  
30  
31  
32  
33  
34  
35  
36  
37  
38  
39  
40  
41  
42  
43  
44  
45  
46  
47  
48  
49  
50  
51  
52  
53  
54  
55  
56  
57  
58  
59  
60
31. Iorga M, Socolov V, Muraru D, Dirtu C, Soponaru C, Ilea C, et al. Factors Influencing Burnout Syndrome in Obstetrics and Gynecology Physicians. *Biomed Res Int*. 2017;2017:9318534.
  32. Shanafelt T, Goh J, Sinsky C. The Business Case for Investing in Physician Well-being. *JAMA Intern Med*. 2017;177(12):1826-32.
  33. Landon BE, Reschovsky JD, Pham HH, Blumenthal D. Leaving medicine: the consequences of physician dissatisfaction. *Med Care*. 2006;44(3):234-42.
  34. Panagioti M, Geraghty K, Johnson J, Zhou A, Panagopoulou E, Chew-Graham C, et al. Association Between Physician Burnout and Patient Safety, Professionalism, and Patient Satisfaction: A Systematic Review and Meta-analysis. *JAMA Intern Med*. 2018;178(10):1317-30.
  35. Studdert DM, Mello MM, Sage WM, DesRoches CM, Peugh J, Zapert K, et al. Defensive medicine among high-risk specialist physicians in a volatile malpractice environment. *JAMA*. 2005;293(21):2609-17.
  36. NHS. NHS Resolution. Annual report and accounts 2017/2018. <https://resolution.nhs.uk/annual-report-and-accounts/>. 2018.
  37. Xu X, Siefert KA, Jacobson PD, Lori JR, Ransom SB. The effects of medical liability on obstetric care supply in Michigan. *Am J Obstet Gynecol*. 2008;198(2):205.e1-9.
  38. Barbieri RL. Professional liability payments in obstetrics and gynecology. *Obstet Gynecol*. 2006;107(3):578-81.
  39. Zwecker P, Azoulay L, Abenhaim HA. Effect of fear of litigation on obstetric care: a nationwide analysis on obstetric practice. *Am J Perinatol*. 2011;28(4):277-84.
  40. Bourne T, Wynants L, Peters M, Van Audenhove C, Timmerman D, Van Calster B, et al. The impact of complaints procedures on the welfare, health and clinical practise of 7926 doctors in the UK: a cross-sectional survey. *BMJ Open*. 2015;5(1):e006687.
  41. Bourne T, Vanderhaegen J, Vranken R, Wynants L, De Cock B, Peters M, et al. Doctors' experiences and their perception of the most stressful aspects of complaints processes in the UK: an analysis of qualitative survey data. *BMJ Open*. 2016;6(7):e011711.
  42. Bourne T, De Cock B, Wynants L, Peters M, Van Audenhove C, Timmerman D, et al. Doctors' perception of support and the processes involved in complaints investigations and how these relate to welfare and defensive practice: a cross-sectional survey of the UK physicians. *BMJ Open*. 2017;7(11):e017856.
  43. Ortashi O, Virdee J, Hassan R, Mutrynowski T, Abu-Zidan F. The practice of defensive medicine among hospital doctors in the United Kingdom. *BMC Med Ethics*. 2013;14:42.
  44. Mello MM, Chandra A, Gawande AA, Studdert DM. National costs of the medical liability system. *Health Aff (Millwood)*. 2010;29(9):1569-77.
  45. NHS. The Maternal and Neonatal Health Safety Collaborative. <https://improvement.nhs.uk/resources/maternal-and-neonatal-safety-collaborative/>. 2017.

- 1  
2  
3 46. NHSE. National Maternity Review. Better Births: Improving outcomes of maternity  
4 services in England. 2016 March 2018. Available from: [https://www.england.nhs.uk/mat-  
6 transformation/implementing-better-births/mat-review/](https://www.england.nhs.uk/mat-<br/>5 transformation/implementing-better-births/mat-review/).
- 7  
8 47. Statistics OfN. Ethnic group, national identity and religion 2010 [Available from:  
9 [https://www.ons.gov.uk/methodology/classificationsandstandards/measuringequality/ethni-  
11 cgroupnationalidentityandreligion#ethnic-group](https://www.ons.gov.uk/methodology/classificationsandstandards/measuringequality/ethni-<br/>10 cgroupnationalidentityandreligion#ethnic-group).
- 12 48. West CP, Dyrbye LN, Shanafelt TD. Physician burnout: contributors, consequences  
13 and solutions. *J Intern Med*. 2018;283(6):516-29.
- 14  
15 49. Maslach C, Jackson SE. The measurement of experienced burnout. *J Organ Behav*.  
16 1981;2(2):99-113.
- 17  
18 50. RCOG. Training Evaluation Form Results London, UK: Royal College of Obstetricians  
19 and Gynaecologists; 2018 [Available from: [https://www.rcog.org.uk/en/careers-  
22 training/about-specialty-training-in-og/assessment-and-progression-through-  
23 training/training-evaluation-form-tef/](https://www.rcog.org.uk/en/careers-<br/>20 training/about-specialty-training-in-og/assessment-and-progression-through-<br/>21 training/training-evaluation-form-tef/).
- 24 51. Ye J, Wang H, Wu H, Ye L, Li Q, Ma XY, et al. Burnout among obstetricians and  
25 paediatricians: a cross-sectional study from China. *BMJ Open*. 2019;9(1):e024205.
- 26  
27 52. Martini S, Arfken CL, Churchill A, Balon R. Burnout comparison among residents in  
28 different medical specialties. *Academic psychiatry : the journal of the American Association  
29 of Directors of Psychiatric Residency Training and the Association for Academic Psychiatry*.  
30 2004;28(3):240-2.
- 31  
32 53. Shanafelt TD, Boone S, Tan L, Dyrbye LN, Sotile W, Satele D, et al. Burnout and  
33 satisfaction with work-life balance among US physicians relative to the general US  
34 population. *Arch Intern Med*. 2012;172(18):1377-85.
- 35  
36 54. RCOG. O&G Workforce Report London, UK: Royal College of Obstetricians and  
37 Gynaecologists; 2017 [Available from: <https://www.rcog.org.uk/workforce2017>.
- 38  
39 55. Tawfik DS, Profit J, Morgenthaler TI, Satele DV, Sinsky CA, Dyrbye LN, et al. Physician  
40 Burnout, Well-being, and Work Unit Safety Grades in Relationship to Reported Medical  
41 Errors. *Mayo Clin Proc*. 2018.
- 42  
43 56. Chu C, Buchman-Schmitt JM, Stanley IH, Hom MA, Tucker RP, Hagan CR, et al. The  
44 interpersonal theory of suicide: A systematic review and meta-analysis of a decade of cross-  
45 national research. *Psychol Bull*. 2017;143(12):1313-45.
- 46  
47 57. Schernhammer ES, Colditz GA. Suicide rates among physicians: a quantitative and  
48 gender assessment (meta-analysis). *Am J Psychiatry*. 2004;161(12):2295-302.
- 49  
50 58. Shanafelt TD, Balch CM, Dyrbye L, Bechamps G, Russell T, Satele D, et al. Special  
51 report: suicidal ideation among American surgeons. *Arch Surg*. 2011;146(1):54-62.
- 52  
53 59. Dyrbye LN, Shanafelt TD. Physician burnout: a potential threat to successful health  
54 care reform. *JAMA*. 2011;305(19):2009-10.
- 55  
56 60. Shanafelt T, Sloan J, Satele D, Balch C. Why do surgeons consider leaving practice? *J*  
57 *Am Coll Surg*. 2011;212(3):421-2.
- 58  
59  
60

- 1  
2  
3 61. Panagioti M, Geraghty K, Johnson J. How to prevent burnout in cardiologists? A  
4 review of the current evidence, gaps, and future directions. *Trends Cardiovasc Med*.  
5 2018;28(1):1-7.  
6  
7 62. Goodman MJ, Schorling JB. A mindfulness course decreases burnout and improves  
8 well-being among healthcare providers. *Int J Psychiatry Med*. 2012;43(2):119-28.  
9  
10 63. Babbar S, Renner K, Williams K. Addressing Obstetrics and Gynecology Trainee  
11 Burnout Using a Yoga-Based Wellness Initiative During Dedicated Education Time. *Obstet*  
12 *Gynecol*. 2019;133(5):994-1001.  
13  
14 64. Shanafelt TD, Noseworthy JH. Executive Leadership and Physician Well-being: Nine  
15 Organizational Strategies to Promote Engagement and Reduce Burnout. *Mayo Clin Proc*.  
16 2017;92(1):129-46.  
17  
18 65. West CP, Dyrbye LN, Erwin PJ, Shanafelt TD. Interventions to prevent and reduce  
19 physician burnout: a systematic review and meta-analysis. *Lancet (London, England)*.  
20 2016;388(10057):2272-81.  
21  
22 66. Shanafelt TD, Balch CM, Bechamps GJ, Russell T, Dyrbye L, Satele D, et al. Burnout  
23 and career satisfaction among American surgeons. *Ann Surg*. 2009;250(3):463-71.  
24  
25 67. Levin KH, Shanafelt TD, Keran CM, Busis NA, Foster LA, Molano JRV, et al. Burnout,  
26 career satisfaction, and well-being among US neurology residents and fellows in 2016.  
27 *Neurology*. 2017;89(5):492-501.  
28  
29 68. Amofo E, Hanbali N, Patel A, Singh P. What are the significant factors associated  
30 with burnout in doctors? *Occup Med (Lond)*. 2015;65(2):117-21.  
31  
32 69. Dyrbye LN, Thomas MR, Eacker A, Harper W, Massie FS, Jr., Power DV, et al. Race,  
33 ethnicity, and medical student well-being in the United States. *Arch Intern Med*.  
34 2007;167(19):2103-9.  
35  
36 70. Dyrbye L, Shanafelt T. A narrative review on burnout experienced by medical  
37 students and residents. *Med Educ*. 2016;50(1):132-49.  
38  
39 71. West CP, Shanafelt TD, Kolars JC. Quality of life, burnout, educational debt, and  
40 medical knowledge among internal medicine residents. *JAMA*. 2011;306(9):952-60.  
41  
42  
43  
44  
45  
46  
47  
48  
49  
50  
51  
52  
53  
54  
55  
56  
57  
58  
59  
60



## Tables

Table 1. Descriptive statistics by doctor category.

|                                                   | <b>Consultants<br/>N=1481</b> | <b>SAS<sup>a</sup><br/>N=257</b> | <b>Trainees<br/>N=1364</b> |
|---------------------------------------------------|-------------------------------|----------------------------------|----------------------------|
| Actively practising                               | 1462 (99%)                    | 254 (99%)                        | 1357 (99%)                 |
| <i>If actively practising<sup>b</sup>:</i>        |                               |                                  |                            |
| Age, mean (range)                                 | 50 (33-73)                    | 47 (27-74)                       | 33 (25-58)                 |
| Female                                            | 831 (58%)                     | 171 (68%)                        | 1067 (80%)                 |
| Ethnicity                                         |                               |                                  |                            |
| White                                             | 831 (57%)                     | 79 (31%)                         | 857 (64%)                  |
| Asian                                             | 438 (30%)                     | 106 (42%)                        | 288 (21%)                  |
| Black                                             | 88 (6%)                       | 23 (9%)                          | 90 (7%)                    |
| Mixed                                             | 58 (4%)                       | 26 (10%)                         | 88 (7%)                    |
| Other                                             | 37 (3%)                       | 19 (8%)                          | 26 (2%)                    |
| Children                                          | 1267 (87%)                    | 198 (78%)                        | 585 (43%)                  |
| Relationship                                      | 1269 (87%)                    | 216 (85%)                        | 979 (72%)                  |
| Qualified in UK/Ireland                           | 865 (59%)                     | 42 (17%)                         | 1089 (80%)                 |
| Full time                                         | 1276 (87%)                    | 211 (83%)                        | 1064 (79%)                 |
| Subspecialty (consultants)                        |                               |                                  |                            |
| None                                              | 1278 (87%)                    | N/A                              | N/A                        |
| Maternal/Fetal medicine                           | 56 (4%)                       | N/A                              | N/A                        |
| Sexual/reproductive health                        | 34 (2%)                       | N/A                              | N/A                        |
| Gynaecological oncology                           | 33 (2%)                       | N/A                              | N/A                        |
| Reproductive medicine                             | 33 (2%)                       | N/A                              | N/A                        |
| Urogynaecology                                    | 28 (2%)                       | N/A                              | N/A                        |
| <b>Maslach Burnout Inventory</b>                  |                               |                                  |                            |
| <b>Emotional exhaustion</b>                       |                               |                                  |                            |
| Mean                                              | 19.9 (0-54)                   | 18.7 (0-53)                      | 21.9 (0-54)                |
| High <sup>c</sup> (%)                             | 411 (28%)                     | 65 (26%)                         | 440 (32%)                  |
| <b>Depersonalisation</b>                          |                               |                                  |                            |
| Mean                                              | 4.5 (0-29)                    | 4.5 (0-30)                       | 7.0 (0-29)                 |
| High <sup>d</sup> (%)                             | 178 (12%)                     | 33 (13%)                         | 394 (29%)                  |
| <b>Personal accomplishment</b>                    |                               |                                  |                            |
| Mean                                              | 37.2 (0-48)                   | 35.3 (4-48)                      | 34.6 (0-48)                |
| Low <sup>e</sup> (%)                              | 382 (26%)                     | 95 (37%)                         | 530 (39%)                  |
| <b>Burnout<sup>f</sup></b>                        | 460 (31%)                     | 76 (30%)                         | 580 (43%)                  |
| <b>Defensive medical practice</b>                 |                               |                                  |                            |
| <b>Avoidance</b>                                  |                               |                                  |                            |
| Mean                                              | 1.4 (0-12)                    | 1.1 (0-12)                       | 0.9 (0-10)                 |
| Elevated <sup>g</sup> (%)                         | 125 (9%)                      | 13 (5%)                          | 58 (4%)                    |
| <b>Hedging</b>                                    |                               |                                  |                            |
| Mean                                              | 5.2 (0-36)                    | 2.8 (0-36)                       | 4.6 (0-36)                 |
| Elevated <sup>h</sup> (%)                         | 164 (11%)                     | 11 (4%)                          | 114 (8%)                   |
| <b>Any defensive medical practice<sup>i</sup></b> | 231 (16%)                     | 20 (8%)                          | 149 (11%)                  |

<sup>a</sup> SAS: Specialty and Specialty Associate Doctors

1  
2  
3 <sup>b</sup> Results for each variable are based on available data, i.e. excluding participants with a  
4 missing value. Gender has the most missing values, 41/3073 (1.3%). Missing values for all  
5 variables are reported in eTable1 in the Supplement.

6 <sup>c</sup> Scores of  $\geq 27$  (range 0-54) are considered high and indicate burnout in accordance with the  
7 Maslach Burnout Inventory

8 <sup>d</sup> Scores of  $\geq 10$  (range 0-30) are considered high and indicate burnout in accordance with the  
9 Maslach Burnout Inventory

10 <sup>e</sup> The score range is 0-48; scores  $\leq 33$  are defined as low personal accomplishment

11 <sup>f</sup> Positive for burnout if emotional exhaustion and/or depersonalisation scores high (as  
12 defined) in accordance with the Maslach Burnout Inventory

13 <sup>g</sup> Scores of  $\geq 13$  (range 0-36) are considered elevated and indicate avoidance behaviour

14 <sup>h</sup> Scores of  $\geq 5$  (range 0-12) are considered elevated and indicate hedging behaviour

15 <sup>i</sup> Defined as elevated levels of avoidance and/or hedging behaviour  
16  
17  
18  
19  
20  
21  
22  
23  
24  
25  
26  
27  
28  
29  
30  
31  
32  
33  
34  
35  
36  
37  
38  
39  
40  
41  
42  
43  
44  
45  
46  
47  
48  
49  
50  
51  
52  
53  
54  
55  
56  
57  
58  
59  
60

For peer review only

Table 2. Descriptive statistics of Burnout and Defensive Medical Practice stratified by demographic variables.

|                                   | Burnout <sup>a</sup> (%) | Avoidance <sup>b</sup> (%) | Hedging <sup>c</sup> (%) | Any DMP <sup>d,e</sup> (%) |
|-----------------------------------|--------------------------|----------------------------|--------------------------|----------------------------|
| <b>Age (years)</b>                |                          |                            |                          |                            |
| <35 (n=948)                       | 440 (46%)                | 37 (4%)                    | 93 (10%)                 | 115 (12%)                  |
| 35-49 (n=1209)                    | 395 (33%)                | 68 (6%)                    | 114 (9%)                 | 151 (12%)                  |
| ≥50 (n=916)                       | 281 (31%)                | 91 (10%)                   | 82 (9%)                  | 134 (15%)                  |
| <b>Gender</b>                     |                          |                            |                          |                            |
| Female (n=2069)                   | 763(37%)                 | 105 (5%)                   | 179 (9%)                 | 239 (12%)                  |
| Male (n=963)                      | 332 (34%)                | 87 (9%)                    | 102 (11%)                | 152 (16%)                  |
| <b>Ethnicity</b>                  |                          |                            |                          |                            |
| White (n=1767)                    | 723 (41%)                | 114 (6%)                   | 159 (9%)                 | 227 (13%)                  |
| Asian (n=832)                     | 229 (28%)                | 49 (6%)                    | 79 (9%)                  | 105 (13%)                  |
| Black (n=201)                     | 57 (28%)                 | 10 (5%)                    | 17 (8%)                  | 21 (10%)                   |
| Mixed (n=172)                     | 59 (34%)                 | 14 (8%)                    | 23 (13%)                 | 31 (18%)                   |
| Other (n=82)                      | 39 (48%)                 | 3 (4%)                     | 7 (9%)                   | 8 (10%)                    |
| <b>Children</b>                   |                          |                            |                          |                            |
| No (n=1023)                       | 473 (46%)                | 48 (5%)                    | 96 (9%)                  | 126 (12%)                  |
| Yes (n=2050)                      | 643 (31%)                | 148 (7%)                   | 193 (9%)                 | 274 (13%)                  |
| <b>Relationship</b>               |                          |                            |                          |                            |
| No (n=601)                        | 266 (44%)                | 32 (5%)                    | 51 (8%)                  | 74 (12%)                   |
| Yes (n=2464)                      | 844 (34%)                | 161 (7%)                   | 237 (10%)                | 323 (13%)                  |
| <b>Country of Qualification</b>   |                          |                            |                          |                            |
| United Kingdom/Ireland (n=1996)   | 841 (42%)                | 125 (6%)                   | 193 (10%)                | 265 (13%)                  |
| Other (n=1075)                    | 273 (25%)                | 71 (7%)                    | 96 (9%)                  | 135 (13%)                  |
| <b>Work status</b>                |                          |                            |                          |                            |
| Full Time (n= 2551)               | 952 (37%)                | 161 (6%)                   | 248 (10%)                | 341 (13%)                  |
| Less Than Full Time (n=519)       | 163 (31%)                | 35 (7%)                    | 41 (8%)                  | 59 (11%)                   |
| <b>Subspecialty (consultants)</b> |                          |                            |                          |                            |
| None (n=1278)                     | 404 (32%)                | 116 (9%)                   | 151 (12%)                | 213 (17%)                  |
| Maternal/Fetal (n=56)             | 20 (36%)                 | 3 (5%)                     | 7 (12.5%)                | 8 (14%)                    |
| Sexual/Reproductive health (n=34) | 10 (29%)                 | 0 (0%)                     | 1 (3%)                   | 1 (3%)                     |
| Gynaecological oncology (n=33)    | 8 (24%)                  | 0 (0%)                     | 1 (3%)                   | 1 (3%)                     |
| Reproductive medicine (n=33)      | 9 (27%)                  | 2 (6%)                     | 0                        | 2 (6%)                     |
| Urogynaecology (n=28)             | 9 (32%)                  | 4 (14%)                    | 4 (14%)                  | 6 (21%)                    |

<sup>a</sup> Positive for burnout if emotional exhaustion score  $\geq 27$  (range 0-54) and/or depersonalisation score  $\geq 10$  (range 0-30) in accordance with the Maslach Burnout Inventory

<sup>b</sup> Defined as avoidance score of  $\geq 13$  (range 0-36)

<sup>c</sup> Defined as hedging score of  $\geq 5$  (range 0-12)

<sup>d</sup> DMP: Defensive Medical Practice

<sup>e</sup> Defined as presence of avoidance and/or hedging (as defined)

Table 3. Descriptive statistics of defensive practice by burnout status

| Doctor category                        | Avoidance <sup>a</sup> |                     | Hedging <sup>b</sup> |                     | Any DMP <sup>c,d</sup> |
|----------------------------------------|------------------------|---------------------|----------------------|---------------------|------------------------|
|                                        | Mean score             | % Elevated          | Mean score           | % Elevated          | %                      |
| <b>Burnout status<sup>e</sup></b>      |                        |                     |                      |                     |                        |
| <b>Consultant</b>                      |                        |                     |                      |                     |                        |
| No burnout (n=1002)                    | 1.05                   | 53 (5%)             | 3.95                 | 67 (7%)             | 101 (10%)              |
| Burnout (n=460)                        | 2.14                   | 72 (16%)            | 7.79                 | 97 (21%)            | 130 (28%)              |
| <b>SAS<sup>f</sup></b>                 |                        |                     |                      |                     |                        |
| No burnout (n=178)                     | 0.72                   | 3 (2%)              | 1.74                 | 2 (1%)              | 5 (3%)                 |
| Burnout (n=76)                         | 1.92                   | 10 (13%)            | 5.34                 | 9 (12%)             | 15 (20%)               |
| <b>Trainees</b>                        |                        |                     |                      |                     |                        |
| No burnout (n=777)                     | 0.59                   | 15 (2%)             | 3.30                 | 25 (3%)             | 36 (5%)                |
| Burnout (n=580)                        | 1.38                   | 43 (7%)             | 6.46                 | 89 (15%)            | 113 (19%)              |
| <b>All doctors</b>                     |                        |                     |                      |                     |                        |
| No burnout (n=1957)                    | 0.84                   | 71 (4%)             | 3.49                 | 94 (5%)             | 142 (7%)               |
| Burnout (n=1116)                       | 1.73                   | 125 (11%)           | 6.93                 | 195 (17%)           | 258 (23%)              |
| <b>Odds ratio<sup>g</sup> (95% CI)</b> |                        | 3.34<br>(2.48-4.53) |                      | 4.18<br>(3.24-5.43) | 3.84<br>(3.08-4.79)    |

<sup>a</sup> Scores of  $\geq 13$  (range 0-36) are considered elevated and indicate avoidance behaviour

<sup>b</sup> Scores of  $\geq 5$  (range 0-12) are considered elevated and indicate hedging behaviour

<sup>c</sup> DMP: Defensive Medical Practice

<sup>d</sup> Defined as elevated levels of avoidance and/or hedging behaviour

<sup>e</sup> Burnout defined as an emotional exhaustion score  $\geq 27$  (range 0-54) and/or depersonalisation score  $\geq 10$  (range 0-30) in accordance with the Maslach Burnout Inventory

<sup>f</sup> SAS: Specialty and Specialty Associate Doctors

<sup>g</sup> Odds ratios are based on univariable logistic regression with Firth bias correction

Table 4. Descriptive statistics of self-reported wellbeing, and odds ratios (with 95% Confidence Intervals (CI)) with burnout

|                                         | All<br>(n=3073) |                                     | Grade                 |                             |                    |
|-----------------------------------------|-----------------|-------------------------------------|-----------------------|-----------------------------|--------------------|
|                                         | N (%)           | Odds ratio <sup>a</sup><br>(95% CI) | Consultants,<br>N (%) | SAS <sup>b</sup> ,<br>N (%) | Trainees,<br>N (%) |
| <b>Cardiovascular problems</b>          | 261 (8)         |                                     | 186 (13)              | 31 (12)                     | 44 (3)             |
| No burnout                              | 148 (8)         | 1.38                                | 114 (11)              | 20 (11)                     | 14 (2)             |
| Burnout <sup>c</sup>                    | 113 (10)        | (1.07-1.78)                         | 72 (16)               | 11 (14)                     | 30 (5)             |
| <b>Gastro-intestinal problems</b>       | 480 (16)        |                                     | 221 (15)              | 29 (11)                     | 230 (17)           |
| No burnout                              | 225 (11)        | 2.28                                | 111 (11)              | 14 (8)                      | 100 (13)           |
| Burnout                                 | 255 (23)        | (1.87-2.78)                         | 110 (24)              | 15 (20)                     | 130 (22)           |
| <b>Depression</b>                       | 416 (14)        |                                     | 141 (10)              | 41 (16)                     | 234 (17)           |
| No burnout                              | 144 (7)         | 4.05                                | 42 (4)                | 21 (12)                     | 81 (10)            |
| Burnout                                 | 272 (24)        | (3.26-5.04)                         | 99 (22)               | 20 (26)                     | 153 (26)           |
| <b>Anxiety</b>                          | 1008 (33)       |                                     | 416 (28)              | 80 (31)                     | 512 (38)           |
| No burnout                              | 439 (22)        | 3.59                                | 194 (19)              | 43 (24)                     | 202 (26)           |
| Burnout                                 | 569 (51)        | (3.07-4.21)                         | 222 (48)              | 37 (49)                     | 310 (53)           |
| <b>Anger-irritability</b>               | 1048 (34)       |                                     | 498 (34)              | 81 (32)                     | 469 (35)           |
| No burnout                              | 465 (24)        | 3.51                                | 235 (23)              | 42 (24)                     | 188 (24)           |
| Burnout                                 | 583 (52)        | (3.00-4.10)                         | 263 (57)              | 39 (51)                     | 281 (48)           |
| <b>Suicidal thoughts</b>                | 90 (3)          |                                     | 33 (2)                | 2 (1)                       | 55 (4)             |
| No burnout                              | 20 (1)          | 6.37                                | 5 (0.5)               | 0                           | 15 (2)             |
| Burnout                                 | 70 (6)          | (3.95-10.7)                         | 28 (6)                | 2 (3)                       | 40 (7)             |
| <b>Sleep problems / insomnia</b>        | 1188 (39)       |                                     | 515 (35)              | 93 (37)                     | 580 (43)           |
| No burnout                              | 563 (29)        | 3.15                                | 256 (26)              | 52 (29)                     | 255 (33)           |
| Burnout                                 | 625 (56)        | (2.70-3.67)                         | 259 (56)              | 41 (54)                     | 325 (56)           |
| <b>Marital/relationship problems</b>    | 544 (18)        |                                     | 206 (14)              | 43 (17)                     | 295 (22)           |
| No burnout                              | 241 (12)        | 2.65                                | 105 (10)              | 20 (11)                     | 116 (15)           |
| Burnout                                 | 303 (27)        | (2.20-3.20)                         | 101 (22)              | 23 (30)                     | 179 (31)           |
| <b>Frequent headaches</b>               | 652 (21)        |                                     | 210 (14)              | 77 (30)                     | 365 (27)           |
| No burnout                              | 317 (16)        | 2.22                                | 107 (11)              | 37 (21)                     | 173 (22)           |
| Burnout                                 | 335 (30)        | (1.86-2.64)                         | 103 (22)              | 40 (53)                     | 192 (33)           |
| <b>Minor colds</b>                      | 812 (26)        |                                     | 268 (18)              | 59 (23)                     | 485 (36)           |
| No burnout                              | 449 (23)        | 1.62                                | 165 (16)              | 42 (24)                     | 242 (31)           |
| Burnout                                 | 363 (33)        | (1.37-1.91)                         | 103 (22)              | 17 (22)                     | 243 (42)           |
| <b>Recurrent respiratory infections</b> | 188 (6)         |                                     | 66 (5)                | 16 (6)                      | 106 (8)            |
| No burnout                              | 81 (4)          | 2.45                                | 31 (3)                | 10 (6)                      | 40 (5)             |
| Burnout                                 | 107 (10)        | (1.82-3.31)                         | 35 (8)                | 6 (8)                       | 66 (11)            |
| <b>Alcohol/drugs problems</b>           | 97 (3)          |                                     | 56 (4)                | 4 (2)                       | 37 (3)             |
| No burnout                              | 40 (2)          | 2.57                                | 24 (2)                | 2 (1)                       | 14 (2)             |
| Burnout                                 | 57 (5)          | (1.71-3.89)                         | 32 (7)                | 2 (3)                       | 23 (4)             |

<sup>a</sup> Odds ratio based on univariable Firth corrected logistic regression of wellbeing item vs burnout with stratification for group (consultant, SAS, trainee)

<sup>b</sup> SAS: Specialty and Specialty Associate Doctors

<sup>c</sup> Burnout defined as an emotional exhaustion score  $\geq 27$  (range 0-54) and/or depersonalisation score  $\geq 10$  (range 0-30) in accordance with the Maslach Burnout Inventory

Table 5. Univariable and multivariable logistic regression results (using Firth bias correction).

| Predictor variable                                                   | Burnout <sup>a</sup>  |                      | Any DMP <sup>b</sup> |                      |
|----------------------------------------------------------------------|-----------------------|----------------------|----------------------|----------------------|
|                                                                      | Crude OR <sup>c</sup> | Adjusted OR          | Crude OR             | Adjusted OR          |
| Grade (versus consultants)                                           |                       |                      |                      |                      |
| SAS <sup>d</sup>                                                     | 0.93<br>(0.70; 1.24)  | 1.14<br>(0.83; 1.55) | 0.47<br>(0.28; 0.73) | 0.40<br>(0.23; 0.65) |
| Trainees                                                             | 1.63<br>(1.39; 1.90)  | 1.00<br>(0.77; 1.31) | 0.66<br>(0.53; 0.82) | 0.47<br>(0.32; 0.70) |
| Age (per 5 years)                                                    | 0.87<br>(0.84; 0.90)  | 0.92<br>(0.87; 0.98) | 1.04<br>(0.99; 1.09) | 0.93<br>(0.85; 1.02) |
| Female (versus male)                                                 | 1.12<br>(0.95; 1.31)  | 0.97<br>(0.81; 1.16) | 0.70<br>(0.56; 0.87) | 0.70<br>(0.55; 0.89) |
| Ethnicity (versus white)                                             |                       |                      |                      |                      |
| Asian                                                                | 0.54<br>(0.45; 0.65)  | 0.74<br>(0.60; 0.91) | 0.98<br>(0.77; 1.25) | 1.15<br>(0.85; 1.54) |
| Black                                                                | 0.57<br>(0.41; 0.78)  | 0.73<br>(0.51; 1.02) | 0.79<br>(0.48; 1.24) | 0.90<br>(0.53; 1.47) |
| Mixed                                                                | 0.75<br>(0.54; 1.03)  | 0.82<br>(0.58; 1.15) | 1.53<br>(1.01; 2.27) | 1.89<br>(1.21; 2.89) |
| Other                                                                | 1.37<br>(0.88; 2.12)  | 2.19<br>(1.37; 3.52) | 0.84<br>(0.40; 1.59) | 0.64<br>(0.29; 1.30) |
| Children                                                             | 0.53<br>(0.46; 0.62)  | 0.78<br>(0.64; 0.97) | 1.10<br>(0.88; 1.38) | 1.03<br>(0.75; 1.41) |
| Current relationship                                                 | 0.65<br>(0.54; 0.78)  | 0.87<br>(0.70; 1.07) | 1.06<br>(0.82; 1.40) | 1.07<br>(0.79; 1.46) |
| Medical Qualification from United Kingdom/Ireland (vs other country) | 2.13<br>(1.81; 2.51)  | 1.74<br>(1.41; 2.16) | 1.06<br>(0.85; 1.33) | 0.84<br>(0.63; 1.14) |
| Full time (vs Less Than Full Time)                                   | 1.30<br>(1.06; 1.59)  | 1.28<br>(1.02; 1.62) | 1.19<br>(0.90; 1.61) | 0.91<br>(0.65; 1.27) |
| Burnout                                                              |                       |                      | 3.84<br>(3.08; 4.79) | 4.35<br>(3.46; 5.49) |

<sup>a</sup>Burnout defined as an emotional exhaustion score  $\geq 27$  (range 0-54) and/or depersonalisation score  $\geq 10$  (range 0-30) in accordance with the Maslach Burnout Inventory

<sup>b</sup>Defensive medical practice (DMP) defined as elevated levels of avoidance and/or hedging behaviour

<sup>c</sup>OR: Odds Ratio

<sup>d</sup>SAS: Specialty and Specialty Associate Doctors

## Supplementary Online Content

eTable 1. Missing data among actively practicing participants

eTable 2. Demographic data of trainees in study and Royal College of Obstetricians and Gynaecologists Training Evaluation Form (TEF) 2018 Survey

eTable 3. Spearman correlations between Maslach Burnout Inventory (MBI) and Defensive Medical Practice (DMP) subscales

eTable 4. Descriptive statistics and crude odds ratio of defensive practice according to each Maslach Burnout Inventory subscale

eFigure 1. Scatter plot of Emotion Exhaustion and Depersonalization Maslach Burnout Inventory subscales

eFigure 2. Nomograms of the multivariable logistic regression models for burnout and any Defensive Medical Practice

eDiscussion. Survey response rate amongst trainees

eMethods. Survey questionnaire

**eTable 1. Missing data among actively practicing participants**

|                                                | <b>Consultants<br/>N=1462</b> | <b>SAS<sup>a</sup><br/>N=254</b> | <b>Trainees<br/>N=1357</b> |
|------------------------------------------------|-------------------------------|----------------------------------|----------------------------|
| Age, mean (range)                              | None missing                  | None missing                     | None missing               |
| Gender                                         | 19 (1%)                       | 2 (1%)                           | 20 (1%)                    |
| Ethnicity                                      | 10 (1%)                       | 1 (<1%)                          | 8 (1%)                     |
| Parity                                         | None missing                  | None missing                     | None missing               |
| Relationship                                   | 3 (<1%)                       | None missing                     | 5 (<1%)                    |
| Medical Qualification country of origin        | None missing                  | 1 (<1%)                          | 1 (<1%)                    |
| Work status (Full Time vs Less Than Full Time) | None missing                  | 1 (<1%)                          | 2 (<1%)                    |
| Maslach Burnout Inventory                      | None missing                  | None missing                     | None missing               |
| Defensive practice                             | None missing                  | None missing                     | None missing               |

<sup>a</sup>SAS: Specialty and Specialty Associate Doctors



**eTable 2. Demographic data of trainees in study and Royal College of Obstetricians and Gynaecologists (RCOG) Training Evaluation Form (TEF) 2018 Survey**

|              | <b>RCOG TEF Database<br/>(n=1754) (%)<sup>a</sup></b> | <b>Trainees<br/>(n=1357) (%)</b> |
|--------------|-------------------------------------------------------|----------------------------------|
| Age          |                                                       |                                  |
| 20-29        | 497 (28.3%)                                           | 336 (24.8%)                      |
| 30-29        | 1092 (62.3%)                                          | 897 (66.1%)                      |
| 40-49        | 106 (6.0%)                                            | 115 (8.4%)                       |
| 50-59        | 2 (0.1%)                                              | 9 (0.7%)                         |
| Over 60      | 0                                                     | 0                                |
| Missing data | 57 (3.3%)                                             | 0                                |
| Female       | 1387 (79.1%)                                          | 1067 (79.8%)                     |
| Ethnicity    |                                                       |                                  |
| White        | 1108 (63.2%)                                          | 857 (63.2%)                      |
| Asian        | 381 (21.7%)                                           | 288 (21.2%)                      |
| Black        | 97 (5.5%)                                             | 90 (6.6%)                        |
| Mixed        | 83 (4.7%)                                             | 88 (6.5%)                        |
| Other        | 68 (3.9%)                                             | 26 (1.9%)                        |
| Missing data | 17 (1%)                                               | 8 (0.6%)                         |

<sup>a</sup> RCOG TEF survey sent to 1956 trainees who held a National Training Number and an email address associated with an active ePortfolio at the time of the survey, which is used to assess competencies and training progress. It was responded to by 1754 trainees (89.7% response rate).

**eTable 3. Spearman correlations between Maslach Burnout Inventory and defensive medical practice subscales**

|                             | <b>EE<sup>b</sup></b> | <b>DP<sup>c</sup></b> | <b>PA<sup>d</sup></b> | <b>Av<sup>e</sup></b> | <b>He<sup>f</sup></b> |
|-----------------------------|-----------------------|-----------------------|-----------------------|-----------------------|-----------------------|
| <b>MBI<sup>a</sup> – EE</b> | 1                     |                       |                       |                       |                       |
| <b>MBI – DP</b>             | 0.57                  | 1                     |                       |                       |                       |
| <b>MBI – PA</b>             | -0.30                 | -0.34                 | 1                     |                       |                       |
| <b>Av</b>                   | 0.28                  | 0.30                  | -0.19                 | 1                     |                       |
| <b>He</b>                   | 0.34                  | 0.38                  | -0.17                 | 0.41                  | 1                     |

<sup>a</sup> MBI: Maslach Burnout Inventory

<sup>b</sup> EE: Emotional Exhaustion

<sup>c</sup> DP: Depersonalization

<sup>d</sup> PA: Personal Accomplishment

<sup>e</sup> Av: Avoidance

<sup>f</sup> He: Hedging

For peer review only

**eTable 4. Descriptive statistics of defensive practice according to each Maslach Burnout Inventory (MBI) subscale**

| MBI <sup>a</sup> subscales       | Avoidance  |                     | Hedging    |                     | Any DMP <sup>b</sup> |
|----------------------------------|------------|---------------------|------------|---------------------|----------------------|
|                                  | Mean score | % Elevated          | Mean score | % Elevated          | %                    |
| High emotional exhaustion        |            |                     |            |                     |                      |
| No (n=2157)                      | 0.88       | 85 (4%)             | 3.76       | 125 (6%)            | 179 (8%)             |
| Yes (n=916)                      | 1.82       | 111 (12%)           | 7.05       | 164 (18%)           | 221 (24%)            |
| Odds ratio <sup>c</sup> (95% CI) |            | 3.36<br>(2.51-4.51) |            | 3.54<br>(2.77-4.54) | 3.51<br>(2.83-4.36)  |
| High depersonalization           |            |                     |            |                     |                      |
| No (n=2468)                      | 0.95       | 106 (4%)            | 3.93       | 159 (6%)            | 229 (9%)             |
| Yes (n=605)                      | 2.02       | 90 (15%)            | 8.06       | 130 (21%)           | 171 (28%)            |
| Odds ratio <sup>c</sup> (95% CI) |            | 3.89<br>(2.89-5.23) |            | 3.97<br>(3.09-5.11) | 3.85<br>(3.08-4.81)  |
| Low personal accomplishment      |            |                     |            |                     |                      |
| No (n=2066)                      | 0.97       | 103 (5%)            | 4.19       | 142 (7%)            | 202 (10%)            |
| Yes (n=1007)                     | 1.55       | 93 (9%)             | 5.87       | 147 (15%)           | 198 (20%)            |
| Odds ratio <sup>c</sup> (95% CI) |            | 1.94<br>(1.45-2.59) |            | 2.31<br>(1.81-2.96) | 2.26<br>(1.83-2.79)  |

<sup>a</sup> MBI: Maslach Burnout Inventory

<sup>b</sup> DMP: Defensive Medical Practice

<sup>c</sup> Odds ratios are based on univariable logistic regression with Firth bias correction.

**eFigure 1. Scatter plot of Emotion Exhaustion and Depersonalization  
Maslach Burnout Inventory subscales**

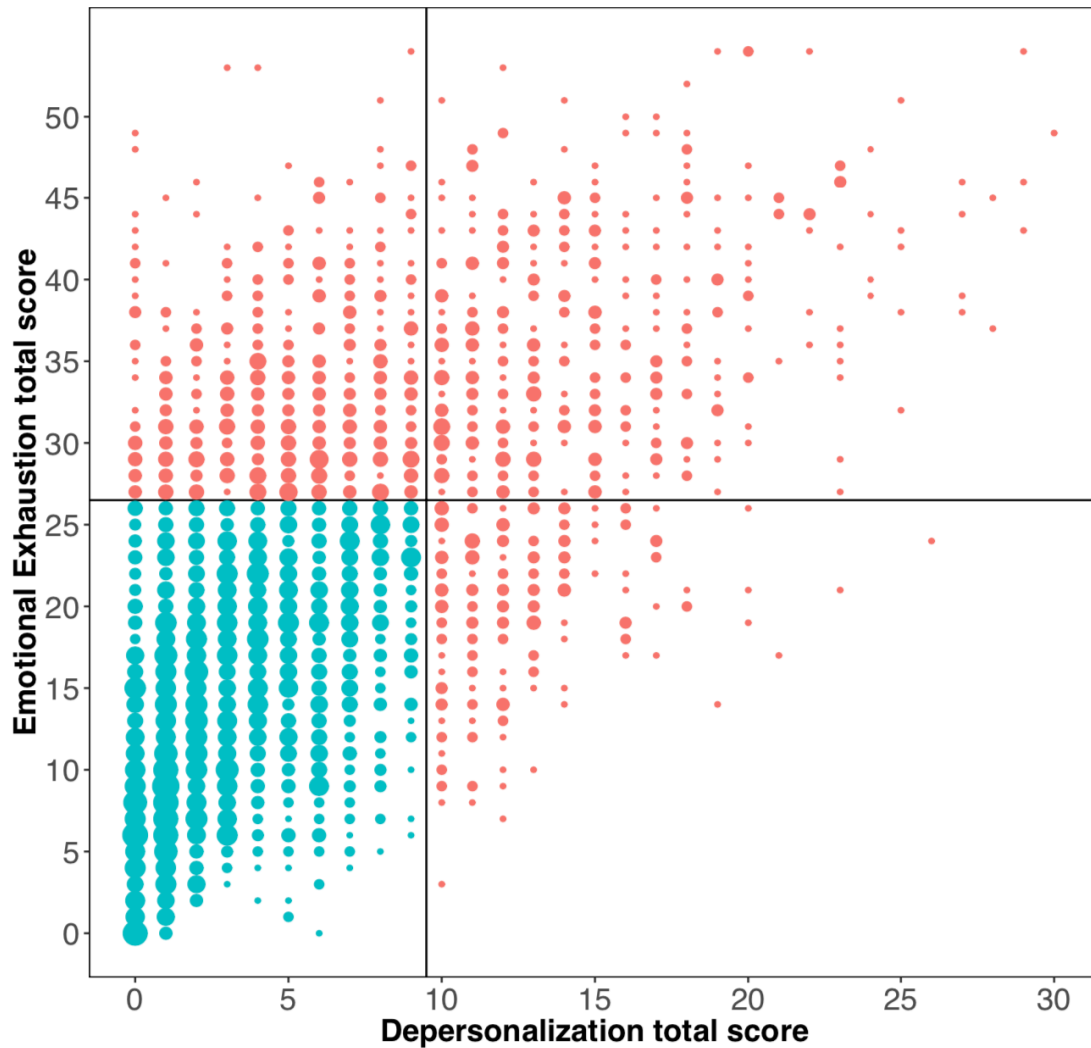

The cutoff values used to define burnout (emotional exhaustion  $\geq 27$  and depersonalization  $\geq 10$ ) are shown with a line with cases meeting the threshold in red. The size of the dots corresponds to the number of cases with these values.

**eFigure 2. Nomograms of the multivariable logistic regression models for burnout (A) and any defensive medical practice (B)**

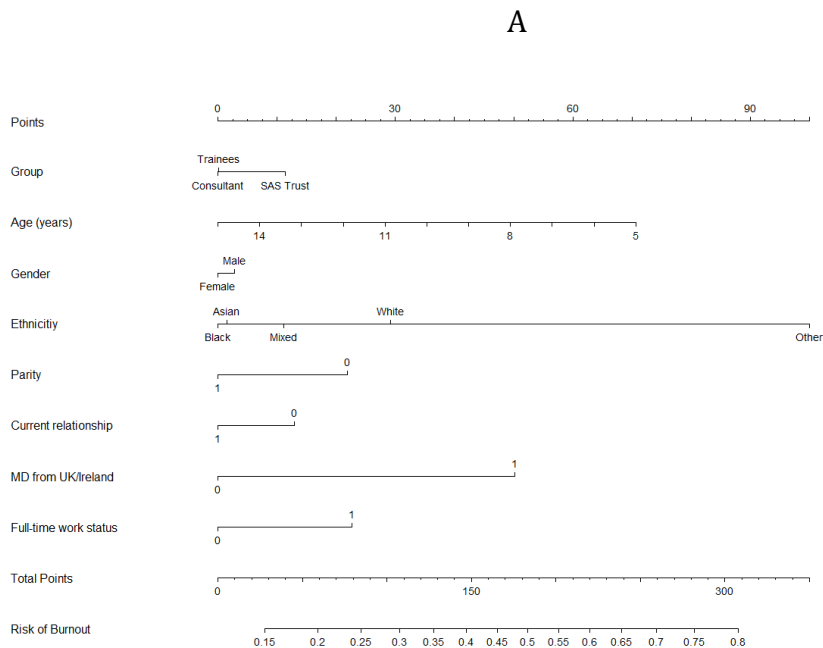

### **eDiscussion. Survey response rate amongst trainees**

Our survey study was sent to trainees working in Obstetrics and Gynecology in the United Kingdom, registered with the Royal College of Obstetricians and Gynaecologists (RCOG) and identified as trainees on the RCOG main database (n=2375) which is the system from which data is extracted for mailings. This is not however the same list used to distribute the RCOG TEF survey (n=1956, eTable 2 in the Supplement) which is sent to trainees who currently hold a National Training Number and an email address associated with an active ePortfolio, which is used to assess competencies and training progress. In view of this, we believe that a proportion of trainees to whom our survey was sent to (based on being identified as a trainee on the RCOG main database) are likely to have been left on the distribution list, but have in fact subsequently suspended training for a period of time or who are no longer trainees and have not informed the RCOG. These doctors would therefore not have completed the survey. This may account for a proportion of the difference in the numbers of trainees between the mailing list we used and that used for the RCOG TEF survey.

## eMethods. Survey Questionnaire

The survey was sent to three participant groups: consultants, specialty and specialty associate (SAS) doctors and trainees with each receiving a tailored version. The questions are marked accordingly.

We are unfortunately unable to include the Maslach Burnout Inventory questionnaire items as these are copyright restricted.

### Section 1: About you

*The following questions apply to all doctors:*

Age

Gender

Female

Male

Intersex

Other (Specify)

I do not wish to disclose

Ethnicity

Asian/Asian British

Bangladeshi

British

Indian

Pakistani

Sri Lankan

Black/African/Caribbean/Black British

African

British

Caribbean

Mixed/multiple ethnic groups

British

White & Asian

White & Black African

White & Black Caribbean

White (UK & Ireland)

British

English

Irish

Northern Irish

Scottish

Welsh

Other Ethnic Group

Arab

Chinese

Dutch

Egyptian

French

German

Italian

Japanese

Korean

Malaysian

Middle Eastern

Myanmar

Persian

Portuguese

Romanian

Russian

Singaporean

1  
2  
3                                   Sri Lankan  
4                                   Sudanese  
5                                   Other (Specify)  
6                                   I do not wish to disclose  
7                   Nationality  
8                   British  
9                   English  
10                  Irish  
11                  Northern Irish  
12                  Scottish  
13                  Welsh  
14                  American  
15                  Australian  
16                  Bangladeshi  
17                  Barbadian  
18                  Canadian  
19                  Chinese  
20                  Dutch  
21                  Egyptian  
22                  German  
23                  Ghanaian  
24                  Greek  
25                  Hong Kongers  
26                  Indian  
27                  Iraqi  
28                  Italian  
29                  Jamaican  
30                  Jordanian  
31                  Libyan  
32                  Malaysian  
33                  Maltese  
34                  Mauritian  
35                  Myanmar  
36                  New Zealander  
37                  Nigerian  
38                  Pakistani  
39                  Polish  
40                  Romanian  
41                  Singaporean  
42                  South African  
43                  Sri Lankan  
44                  Sudanese  
45                  Syrian  
46                  Trinidadian  
47                  Zimbabwean  
48                  Other (Specify)  
49                  I do not wish to disclose  
50           Religion or Belief  
51           Atheism  
52           Buddhism  
53           Christianity  
54           Hinduism  
55           Islam  
56           Jainism  
57           Judaism  
58           Quaker  
59           Sikhism  
60           Other (Specify)  
              No religion  
              I do not wish to disclose



1  
2  
3 Disability

4 Yes

5 No

6 I do not wish to disclose

7 Do you have children?

8 No

9 One

10 Two

11 Three

12 Four +

13 I do not wish to disclose

14 In what country did you obtain your primary medical degree?

15  
16 ***The following question applies to trainees only:***

17 How many years have you been qualified as a doctor? Number

18  
19 ***The following questions apply to SAS doctors only:***

20 Have you ever held a UK National Training Number (NTN)?

21 Yes

22 No

23 If no, are you interested in acquiring one?

24 Yes

25 No

26 Other (please specify)

27 Are you working towards entry on the specialist register through the Certificate of Eligibility for  
28 Specialist Registration (CESR)?

29 Yes

30 No

31 No - I am not currently working towards it but am planning to in the future

32 No - I am already on the specialist register

33 Undecided

34 Other (specify)

35 If you are already on the Specialist Register, have you applied for consultant posts?

36 Yes - but not yet successful

37 No

38 N/A

39 Other (please specify)

40 What category of RCOG membership are you in?

41 Associate

42 Fellow

43 Member

44 Are you currently involved in College work?

45 No

46 Yes - examiner

47 Yes - committee member

48 Yes - advisory group

49 Yes - working group

50 Not currently - but have been in past or other (please specify)

51  
52 ***The following questions apply to consultants only:***

53 In which country was the majority of your specialty training completed

54 How many years have you been qualified to be a consultant?

55  
56 **Section 2: Your Role**

57 ***The following questions apply to trainees only:***

58 What best describes your current work status?

59 Specialty Trainee (ST)

60 Parental leave

Out of programme (OOP) research

OOP clinical experience

- 1  
2  
3 OOP career break  
4 OOP teaching  
5 OOP research/teaching  
6 OOP clinical experience/teaching  
7 Academic clinical fellow  
8 Academic clinical lecturer  
9 Subspecialty training (SST) Gynaecological Oncology  
10 SST Maternal and Fetal Medicine  
11 Fixed Term Specialty Training Appointment (FTSTA)  
12 Medical Training Initiative (MTI)  
13 SST Urogynaecology  
14 SST Reproductive Medicine  
15 Clinical Fellow  
16 Other (specify)  
17 Who is your training Local Education and Training Board (LETB)/Deanery?  
18 East of England  
19 Kent, Surrey and Sussex  
20 Merseyside  
21 North Central and East London  
22 North East  
23 North West  
24 North West London  
25 Northern Ireland  
26 Oxford  
27 Scotland  
28 Severn  
29 South London  
30 South West  
31 Thames Valley  
32 Wales  
33 Wessex  
34 West Midlands  
35 Yorkshire and the Humber  
36 Other (specify)  
37 What training level are you at?  
38 ST1  
39 ST2  
40 ST3  
41 ST4  
42 ST5  
43 ST6  
44 ST7  
45 Other (specify)  
46 If relevant, what is your sub-speciality/special interest?  
47 Abortion care/sexual health  
48 Paediatric and adolescent gynaecology  
49 Reproductive medicine/Subfertility  
50 Urogynaecology  
51 Vulval disease  
52 Medical education  
53 Minimal access surgery  
54 Risk management  
55 Patient Safety leadership  
56 Leadership  
57 Acute gynaecology and early pregnancy  
58 Benign gynaecology surgery  
59 Colposcopy and cervical pathology  
60 Fetal Medicine  
Gynaecological oncology  
High-risk pregnancy and maternal medicine

1  
2  
3  
4  
5  
6  
7  
8  
9  
10  
11  
12  
13  
14  
15  
16  
17  
18  
19  
20  
21  
22  
23  
24  
25  
26  
27  
28  
29  
30  
31  
32  
33  
34  
35  
36  
37  
38  
39  
40  
41  
42  
43  
44  
45  
46  
47  
48  
49  
50  
51  
52  
53  
54  
55  
56  
57  
58  
59  
60

Labour ward  
Menopause/post-reproductive health  
Sub Specialty - Gynaecological oncology  
Sub Specialty - Maternal and fetal medicine  
Sub Specialty - Reproductive medicine  
Sub Specialty - Urogynaecology  
Sub Specialty - Sexual and Reproductive Health

N/A

Other (Specify)

Do you do any non-NHS work and/or non O&G work?

Yes

No

***The following questions apply to SAS doctors only:***

What best describes your current work status?

Actively practising in healthcare outside of O&G

Actively practising in O&G

On a career break/sabbatical

On parental leave

On sick leave

Other (specify)

What job title do you have?

Specialty Doctor

Associate Specialist

Staff grade

Trust Doctor

Trust Registrar

Clinical Fellow

Clinical Assistant

Locum Appointment for Training/Service

Foundation Year 3

Other (Specify)

Why did you take up your current post? (select all that apply)

Geographical Stability

Work-life balance

Regular hours

Pay

Not on Specialist register and unable to get a trainee post

On Specialist register but unable to get a consultant post

No on call

Other (specify)

Who are you contracted to work for?

Pure NHS

Joint NHS with other

Joint NHS/academic - majority NHS funded (e.g. honorary academic post)

Pure academic/research (e.g. paid for by university)

Other (Specify)

Do you work in an NHS teaching (tertiary referral) hospital or a District General Hospital? If neither, please give details.

NHS teaching hospital

District General hospital

Neither - please specify

Are you employed on a contract with nationally agreed terms and conditions?

Yes

No

Don't know

In what areas of O&G do you practice?

Gynaecology only

Obstetrics and Gynaecology

Obstetrics only

1  
2  
3 Other (Specify)  
4 Do you have a special interest? (select all that apply)

5 Fertility  
6 Sexual Health  
7 Early Pregnancy  
8 Acute Gynaecology  
9 Leadership  
10 Labour ward  
11 Antenatal care  
12 Maternal Medicine  
13 Fetal Medicine  
14 Diabetic Pregnancy  
15 Gynae-oncology  
16 Colposcopy  
17 Psychosexual health  
18 Benign Gynaecology  
19 Minimally invasive surgery  
20 Menopause  
21 Gynae ultrasound  
22 Obstetric ultrasound  
23 Maternal Mental health  
24 No

25 Do you currently work at a registrar or consultant level

26 Consultant level  
27 Registrar level  
28 Both  
29 Other (specify)

30 Do you do any non-NHS work and/or non O&G work?

31 No  
32 Yes - Please specify

33  
34 ***The following questions apply to consultants only:***

35 What best describes your current work status?

36 Actively practising in healthcare outside O&G  
37 Actively practising in O&G  
38 On a career break/sabbatical  
39 On parental leave  
40 On sick leave  
41 Retired  
42 Other (Specify)

43 Who are you contracted to work for? (Yes/No)

44 Pure NHS  
45 Pure academic/research (e.g paid for by university)  
46 Joint NHS/academic - majority NHS funded (e.g honorary academic post)  
47 Joint NHS/academic - majority academic funded (e.g university with honorary NHS)  
48 Joint NHS with other  
49 Joint academic/research with other  
50 Other (including not currently working)

51 What is your primary post?

52 Consultant O&G  
53 Consultant Gynaecologist  
54 Consultant Obstetrician  
55 Locum Consultant  
56 Consultant Sexual & Reproductive Health  
57 Professor  
58 Acting Consultant  
59 Consultant Private Practice  
60 Consultant GUM  
Academic Senior Clinical Fellow

1  
2  
3  
4  
5  
6  
7  
8  
9  
10  
11  
12  
13  
14  
15  
16  
17  
18  
19  
20  
21  
22  
23  
24  
25  
26  
27  
28  
29  
30  
31  
32  
33  
34  
35  
36  
37  
38  
39  
40  
41  
42  
43  
44  
45  
46  
47  
48  
49  
50  
51  
52  
53  
54  
55  
56  
57  
58  
59  
60

- Honorary Consultant  
Senior Clinical Lecturer Honorary  
Senior Lecturer  
Senior Clinical Research Fellow  
Emeritus Professor  
Other (Specify)
- Which would best describe your post?  
Special interest  
Sub-specialty  
Other (Specify)
- If relevant, what is your subspecialty/special interest?  
Abortion care/sexual health  
Acute gynaecology and early pregnancy  
Benign gynaecological surgery (office gynaecology, hysteroscopy, etc  
Colposcopy and cervical pathology  
Fetal medicine  
Gynaecological oncology  
High risk pregnancy/Maternal medicine  
Labour Ward  
Menopause/Post reproductive health  
Paediatric and adolescent gynaecology  
Reproductive medicine/Subfertility  
Urogynaecology  
Vulval disease  
Medical education  
Minimal access surgery  
Risk management  
Patient Safety leadership  
Leadership  
Sub specialty - Gynaecological oncology  
Sub specialty - Maternal and fetal medicine  
Sub specialty - Reproductive medicine  
Sub specialty - Urogynaecology  
Sub specialty - Sexual and reproductive health  
N/A  
Other (Specify)
- Do you do any private work?  
Yes  
No  
N/A  
Other (Specify)
- Do you hold any of the following leadership roles? (Yes/No)  
Clinical Director  
Medical Director  
Clinical Governance Lead  
Labour Ward Lead  
Special Interest Lead  
Audit Lead  
Risk Management Lead  
No  
Other (specify)
- If yes, how are you remunerated for these lead positions (in terms of programmed activities (PAs))?  
0.5  
1  
1.5  
2  
2.5  
3  
3.5

- 1  
2  
3 4  
4 4.5  
5 5  
6 6  
7 6.5  
8 7  
9 8  
10 10  
11 Responsibility payment  
12 N/A  
13 Are these included in your weekly job plan, or are they additional?  
14 Yes, Includes  
15 No, additional  
16 Other (Specify)

### Section 3: Your Working Patterns and Professional Development

#### *The following questions apply to trainees only:*

19 Do you work full time or less than full time (LTFT)?

- 20 Full-Time  
21 LTFT, (50%)  
22 LTFT, (60%)  
23 LTFT, (70%)  
24 LTFT, (80%)  
25 LTFT, (90%)  
26 Other (Specify)

27 When completing your training do you intend to work full time or LTFT?

- 28 LTFT  
29 Work full time  
30 Uncertain  
31 Other (Specify)

32 What is the on call frequency at your level?

- 33 1:1  
34 1:2  
35 1:3  
36 1:4  
37 1:5  
38 1:6  
39 1:7  
40 1:8  
41 1:9  
42 1:10  
43 1:11  
44 1:12  
45 1:14  
46 1:15  
47 1:16  
48 1:18  
49 1:19  
50 1:20  
51 N/A

Other (specify)

52 What type of middle grade on call rota does your unit have during the day, excluding consultant cover?

- 53 Single middle grade on call rota with ST1-2 level cover (including junior cover by other  
54 doctors e.g. Foundation & General Practice (GP) trainees)  
55 Single middle grade on call rota without ST1-2 level cover (including junior cover by other  
56 doctors e.g. Foundation & GP trainees)  
57 Two middle grades on call working at the same level with ST1-2 level cover (including junior  
58 cover by other doctors e.g. Foundation & GP trainees)  
59 Two middle grades on call working at the same level without ST1-2 level cover (including  
60 junior cover by other doctors e.g. Foundation & GP trainees)

1  
2  
3  
4  
5  
6  
7  
8  
9  
10  
11  
12  
13  
14  
15  
16  
17  
18  
19  
20  
21  
22  
23  
24  
25  
26  
27  
28  
29  
30  
31  
32  
33  
34  
35  
36  
37  
38  
39  
40  
41  
42  
43  
44  
45  
46  
47  
48  
49  
50  
51  
52  
53  
54  
55  
56  
57  
58  
59  
60

Two tier middle grade rota with one senior and one junior middle grade with ST1-2 level cover (including junior cover by other doctors e.g. Foundation & GP trainees)  
Two tier middle grade rota with one senior and one junior middle grade without ST1-2 level cover (including junior cover by other doctors e.g. Foundation & GP trainees)  
Other (specify)

Have you ever taken any time out of programme during your training? (Please select all that apply)

OOPT  
OOPE  
OOPR  
OOPC  
OOPE/T  
OOPR/T  
Parental leave  
No  
Other (please specify)

After you complete training what area of O&G do you intend to practice?

Benign gynaecological surgery (office gynaecology, hysteroscopy, etc.)  
Colposcopy and cervical pathology  
Fetal medicine  
Gynaecological oncology  
High risk pregnancy/Maternal medicine  
Labour Ward  
Menopause/Post reproductive health  
Other (specify)

After completion of your training do you intend work resident out of hours?

Yes  
No

If you intend to work resident out of hours do anticipate this will be for your entire career?

Early career only  
Entire career  
Unsure  
N/A  
Other (specify)

Are you aware of gaps in the rota at your level at your current unit?

Yes  
No  
N/A

Do you have specialty doctors (SAS, Trust, etc.) supporting your rotas?

Yes  
No  
N/A

***The following questions apply to SAS doctors only:***

How many hours/week are you contracted to work?

<20  
20-39  
40  
41-50  
>50

Do you work resident out of hours on call?

No  
Yes  
N/A

If yes, is this first on call, second on call or third on call?

Please specify

If you work resident out of hours do you anticipate this will be your entire career?

Early career only  
Entire career  
Other - Please specify  
N/A

1  
2  
3 Do you work non-resident consultant level out of hours on call?

4 Yes

5 No

6 Other - please specify

7 Does your job plan include at least 4 hours/week (= one session if on programmed activities (PA)  
8 contract) for supporting professional activities (SPA)? (SPA = non clinical time for audit, teaching,  
9 governance, CPD, appraisal)

10 Yes

11 No

12 Don't know

13 When on call what areas do you cover?

14 Gynaecology only

15 Obstetrics and gynaecology

16 Obstetrics only

17 Other (specify)

18 Do you have an educational supervisor?

19 Yes

20 No

21 Don't know

22 Other (specify)

23 Do you work in a formal educational role?

24 Educational supervisor

25 Clinical supervisor

26 Teaching Fellow

27 SAS Tutor

28 Other (specify)

29 Do you have a formal leadership role?

30 Medical Director

31 Associate Medical Director

32 Clinical Director

33 Audit Lead

34 Governance Lead

35 Service Lead

36 Other (specify)

37 Are you, or have you ever been, principle investigator (PI) for a research project?

38 Yes

39 No

40 Other (specify)

41 Are you, or have you ever been, an appraiser?

42 Yes

43 If you were but are no longer an appraiser then why did you stop? (specify)

44 No

45 If yes, do you appraise consultants?

46 Yes

47 No

48 Do you work autonomously (have your own clinics and/or theatre lists)?

49 Yes

50 No

51 If yes, is this work coded in your own name or a consultants name?

52 Own

53 Consultant

54 Don't know

55 Other (specify)

56 ***The following questions apply to consultants only:***

57 Has your workload increased in the last 12 months?

58 Yes

59 No

60 Other (Specify)

Do you work full time or LTFT?



1  
2  
3  
4  
5  
6  
7  
8  
9  
10  
11  
12  
13  
14  
15  
16  
17  
18  
19  
20  
21  
22  
23  
24  
25  
26  
27  
28  
29  
30  
31  
32  
33  
34  
35  
36  
37  
38  
39  
40  
41  
42  
43  
44  
45  
46  
47  
48  
49  
50  
51  
52  
53  
54  
55  
56  
57  
58  
59  
60

Full Time  
LTFT, 10%  
LTFT, 20%  
LTFT, 30%  
LTFT, 40%  
LTFT, 50%  
LTFT, 60%  
LTFT, 70%  
LTFT, 80%  
LTFT, 90%

N/A

Other (Specify)

How many PAs per week are in your job plan?

Number (to nearest 0.5)

N/A

Other - Specify

Number of Direct Clinical Care PAs

Number (to nearest 0.5)

N/A

Other (Specify)

Number of Supporting Professional Activities (SPAs)

Number (to nearest 0.5)

N/A

Other (Specify)

Number of Academic PAs

Number (to nearest 0.5)

N/A

Other (Specify)

Number of other (i.e. education, managerial) PAs

Number (to nearest 0.5)

N/A

Other (Specify)

What is the O&G split of your daytime PAs?

0% Obstetric, 100% Gynaecology

10% Obstetric, 90% Gynaecology

100% Obstetric, 0% Gynaecology

20% Obstetric, 80% Gynaecology

30% Obstetric, 70% Gynaecology

40% Obstetric, 60% Gynaecology

50% Obstetric, 50% Gynaecology

60% Obstetric, 40% Gynaecology

70% Obstetric, 30% Gynaecology

80% Obstetric, 20% Gynaecology

90% Obstetric, 10% Gynaecology

N/A

Would you like to decrease the amount of obstetric work you do?

Yes

No

N/A

Are any of your PAs out of hours (evening, weekend, emergency, on-call etc.)?

Yes

No

N/A

If you work over night on call would you like to reduce this?

Yes

No

N/A

If you work out of hours, what is your PA split?

0% Obstetric, 100% Gynaecology

10% Obstetric, 90% Gynaecology

1  
2  
3  
4  
5  
6  
7  
8  
9  
10  
11  
12  
13  
14  
15  
16  
17  
18  
19  
20  
21  
22  
23  
24  
25  
26  
27  
28  
29  
30  
31  
32  
33  
34  
35  
36  
37  
38  
39  
40  
41  
42  
43  
44  
45  
46  
47  
48  
49  
50  
51  
52  
53  
54  
55  
56  
57  
58  
59  
60

100% Obstetric, 0% Gynaecology  
20% Obstetric, 80% Gynaecology  
30% Obstetric, 70% Gynaecology  
40% Obstetric, 60% Gynaecology  
50% Obstetric, 50% Gynaecology  
60% Obstetric, 40% Gynaecology  
70% Obstetric, 30% Gynaecology  
80% Obstetric, 20% Gynaecology  
90% Obstetric, 10% Gynaecology  
N/A

Does your job plan require you to work routinely resident in the hospital outside 'office hours'?

Yes  
No  
N/A

If yes, are these twilight/weekend day shifts or can they include time after midnight?

Twilight/weekend day shifts only  
Include time after midnight  
N/A  
Other

Who is resident with you usually for twilight/weekend days?

A junior grade (GP trainee, F2)  
An O&G trainee (or equivalent) (ST1/ST2)  
At least one doctor who is ST3 or higher  
N/A  
Other (Specify)

Who is resident with you usually for after midnight shifts?

A junior grade (GP trainee, F2)  
An O&G trainee (or equivalent) (ST1/ST2)  
At least one doctor who is ST3 or higher  
N/A  
Other (Specify)

Do you plan to reduce sessions as part of your retirement plan?

Yes  
No  
Don't know  
N/A  
Other (Specify)

When (what year) do you plan to retire completely from clinical work?

2018-2019  
2019-2020  
2021-2025  
2026-2030  
2031-2035  
2036-2040  
2041-2045  
2046-2050  
2051-2055  
2056-2060

Do you intend to retire and then return to work?

Yes - please specify intended number of sessions  
No  
Other (Specify)

When on duty are you aware of gaps in the trainee's rotas?

Frequently  
Infrequently  
Never  
Often  
N/A

Are you ever required to fill in for absent staff at a lower grade?

Frequently

1  
2  
3  
4  
5  
6  
7  
8  
9  
10  
11  
12  
13  
14  
15  
16  
17  
18  
19  
20  
21  
22  
23  
24  
25  
26  
27  
28  
29  
30  
31  
32  
33  
34  
35  
36  
37  
38  
39  
40  
41  
42  
43  
44  
45  
46  
47  
48  
49  
50  
51  
52  
53  
54  
55  
56  
57  
58  
59  
60

Infrequently  
Never  
Often  
N/A

Do you have specialty doctors (SAS, Trust, etc.) supporting your rotas?

Yes  
No  
N/A

If yes, which of these roles provide this service? (Yes/No)

Associate Specialist  
LAS/LATs  
Staff Grade  
Trust Doctor  
Other (Specify)

Do you feel you have a team structure that adequately supports your development and practice needs?

Yes - please explain why  
No - please explain why  
Don't know  
N/A

If yes, can we contact you to obtain a copy of your team structure?

Yes  
No  
N/A

#### Section 4: Your Wellbeing

*The following questions apply to trainees and SAS doctors only:*

Since starting specialty training how often have you thought of leaving O&G/medicine entirely?

Daily  
Weekly  
Monthly  
Occasionally  
Never

If you have or would ever consider leaving speciality training what reasons would you give? (Please only tick those that would impact on your decision)

Family  
Lack of work-life balance  
Pay  
Long working hours  
Shift working  
Intense workload  
Rota gaps  
Desire to work abroad  
Inability to work less than full time  
Issues with gaining adequate clinical experience when working less than full time  
Preference to work in another geographic area  
Preference to work in another specialty  
Personal Health  
Physical demands of the job  
Personal mental health  
Stress  
Lack of clinical supervision  
Poor pastoral support  
Poor educational supervision  
Low morale  
No support from colleagues  
No social interaction with colleagues  
Commuting distance  
Frustration with training  
Frustration with health service

1  
2  
3  
4  
5  
6  
7  
8  
9  
10  
11  
12  
13  
14  
15  
16  
17  
18  
19  
20  
21  
22  
23  
24  
25  
26  
27  
28  
29  
30  
31  
32  
33  
34  
35  
36  
37  
38  
39  
40  
41  
42  
43  
44  
45  
46  
47  
48  
49  
50  
51  
52  
53  
54  
55  
56  
57  
58  
59  
60

- Blame culture
- Lack of improvement
- Litigation
- Fear of litigation
- No opportunities to debrief following adverse event or serious incident
- No support following adverse event or serious incident
- Patient care/safety concerns
- Concerns with new contract
- Insufficient financial remuneration
- Under resourced health service
- N/A
- Other (Specify)

What are the positive aspects of O&G that you experience and make you want to pursue this as your chosen career? (Please select all that apply)

- Unique mix of medicine and surgery
- Good communication / team working
- Demonstrating your ability to cope well under pressure
- Good support from colleagues
- Good support from trainers/supervisors
- A balanced work intensity that makes the job interesting and enjoyable
- Financial remuneration
- Sub-Specialty training
- Academic training
- Research opportunities
- Personally fulfilling/rewarding
- Challenging (but with appropriate support)
- Out of programme opportunities
- Ability to work flexibly
- Being seen as a valued team member
- Don't know
- Other (Specify)

Do post-shift rest facilities exist within your hospital (e.g. a sleep off room)?

- Yes
- No
- I don't know

Have you ever used such facilities?

- Yes
- No
- N/A

If they exist, how easily accessible are these facilities?

- Difficult
- Don't know
- Easy
- Some effort
- Very difficult
- Very easy
- N/A

Do you have accessible and adequate rest facilities available during your night shifts (i.e. private area with bedding/comfortable chair)?

- Yes
- No
- I don't know
- N/A

Have you ever used such facilities?

- Yes
- No
- N/A

If they exist, how easily accessible are these facilities?

- Difficult
- Don't know

1  
2  
3  
4  
5  
6  
7  
8  
9  
10  
11  
12  
13  
14  
15  
16  
17  
18  
19  
20  
21  
22  
23  
24  
25  
26  
27  
28  
29  
30  
31  
32  
33  
34  
35  
36  
37  
38  
39  
40  
41  
42  
43  
44  
45  
46  
47  
48  
49  
50  
51  
52  
53  
54  
55  
56  
57  
58  
59  
60

Easy  
Some effort  
Very difficult  
Very easy  
N/A

How often do you sleep for at least 30 minutes uninterrupted during a night shift?

About half  
Less than half  
Most shifts  
Never  
N/A

How do you normally commute home after a night shift?

Cycle  
Drive - car  
Drive - motorcycle  
Other (Specify)  
Public transport  
Taxi or equivalent  
Walk  
N/A

How long does your commute usually take after a night shift?

15-30 minutes  
30-60 minutes  
< 15 minutes  
> 60 minutes  
N/A

If applicable, do you ever feel too tired to drive home after a night shift?

Yes  
No  
N/A

If applicable, have you ever had an accident/near miss when driving home after a night shift?

No  
Yes  
Prefer not to say  
N/A

*The following sections apply to all doctors*

**Section 5: Maslach Burnout Inventory (Copyright Restricted)**

**Section 6: Defensive Medical Practice**

Within the last 6 months, have you ever taken the following actions which you would not have done if you were not worried about possible consequences such as complaints, disciplinary actions by managers, being sued, or publicity in the media? For each of the following, please rate each item on a 5-point Likert scale

Avoidance (3 items)

Avoided a particular type of invasive procedure

Never  
Rarely  
Sometimes  
Quite often  
Often

Not accepted "high risk" patients in order to avoid possible complications

Never  
Rarely  
Sometimes  
Quite often  
Often

Stopped doing aspects of your job

Never

- 1  
2  
3 Rarely  
4 Sometimes  
5 Quite often  
6 Often  
7 Hedging (9 items)  
8 Prescribed more medications than medically indicated  
9 Never  
10 Rarely  
11 Sometimes  
12 Quite often  
13 Often  
14 Referred to specialists in unnecessary circumstances  
15 Never  
16 Rarely  
17 Sometimes  
18 Quite often  
19 Often  
20 Conducted more investigations or made more referrals than warranted by the patient's  
21 condition  
22 Never  
23 Rarely  
24 Sometimes  
25 Quite often  
26 Often  
27 Admitted patients to hospital when the patient could have been discharged home safely or  
28 managed as an outpatient  
29 Never  
30 Rarely  
31 Sometimes  
32 Quite often  
33 Often  
34 Asked for more frequent observations to be carried out on a patient than necessary  
35 Never  
36 Rarely  
37 Sometimes  
38 Quite often  
39 Often  
40 Written in patients' records specific remarks such as "not suicidal" which you would not if you  
41 were not worried about legal/media/disciplinary consequences  
42 Never  
43 Rarely  
44 Sometimes  
45 Quite often  
46 Often  
47 Written more letters about a patient than is necessary to communicate about the patient's  
48 condition  
49 Referred patient for a second opinion more than necessary  
50 Never  
51 Rarely  
52 Sometimes  
53 Quite often  
54 Often  
55 Carried out more tests than necessary  
56 Never  
57 Rarely  
58 Sometimes  
59 Quite often  
60 Often

## Section 7: Doctor Wellbeing

1  
2  
3 In the past 12 months have you experienced:

4 Cardio-vascular problems (e.g. high blood pressure, angina, heart attack)

5 Yes

6 No

7 Gastro-intestinal problems (e.g. gastritis, irritable bowel syndrome, ulcers)

8 Yes

9 No

10 Depression

11 Yes

12 No

13 Anxiety

14 Yes

15 No

16 Anger & irritability

17 Yes

18 No

19 Other mental health problems

20 Yes

21 No

22 Suicidal thoughts

23 Yes

24 No

25 Sleep problems/insomnia

26 Yes

27 No

28 Marital/relationship problems

29 Yes

30 No

31 Frequent headaches

32 Yes

33 No

34 Minor colds

35 Yes

36 No

37 Recurring respiratory infections

38 Yes

39 No

40 None of the above

41 Yes

42 No

43 Other

44 Yes (please specify)

45 No

46 Any additional life stressors (e.g. bereavement, accident etc.)

47 Yes – currently (in the last 6 months)

48 Yes – in the past (more than 6 months ago)

49 No

50 Have you ever been aware of, or other people raised concerns, that you are drinking too much  
51 alcohol or taking (prescribed or non-prescribed) drugs?  
52  
53  
54  
55  
56  
57  
58  
59  
60

STROBE Statement—Checklist of items that should be included in reports of *cohort studies*

|                              | Item No | Recommendation                                                                                                                                                                                                                                                                                                         | Page No                              |
|------------------------------|---------|------------------------------------------------------------------------------------------------------------------------------------------------------------------------------------------------------------------------------------------------------------------------------------------------------------------------|--------------------------------------|
| <b>Title and abstract</b>    | 1       | (a) Indicate the study's design with a commonly used term in the title or the abstract<br>(b) Provide in the abstract an informative and balanced summary of what was done and what was found                                                                                                                          | 1<br>2-3                             |
| <b>Introduction</b>          |         |                                                                                                                                                                                                                                                                                                                        |                                      |
| Background/rationale         | 2       | Explain the scientific background and rationale for the investigation being reported                                                                                                                                                                                                                                   | 5-6                                  |
| Objectives                   | 3       | State specific objectives, including any prespecified hypotheses                                                                                                                                                                                                                                                       | 6-7                                  |
| <b>Methods</b>               |         |                                                                                                                                                                                                                                                                                                                        |                                      |
| Study design                 | 4       | Present key elements of study design early in the paper                                                                                                                                                                                                                                                                | 7                                    |
| Setting                      | 5       | Describe the setting, locations, and relevant dates, including periods of recruitment, exposure, follow-up, and data collection                                                                                                                                                                                        | 7                                    |
| Participants                 | 6       | (a) Give the eligibility criteria, and the sources and methods of selection of participants. Describe methods of follow-up<br>(b) For matched studies, give matching criteria and number of exposed and unexposed                                                                                                      | 7-8                                  |
| Variables                    | 7       | Clearly define all outcomes, exposures, predictors, potential confounders, and effect modifiers. Give diagnostic criteria, if applicable                                                                                                                                                                               | 8-9                                  |
| Data sources/<br>measurement | 8*      | For each variable of interest, give sources of data and details of methods of assessment (measurement). Describe comparability of assessment methods if there is more than one group                                                                                                                                   | 8-9                                  |
| Bias                         | 9       | Describe any efforts to address potential sources of bias                                                                                                                                                                                                                                                              | N/A                                  |
| Study size                   | 10      | Explain how the study size was arrived at                                                                                                                                                                                                                                                                              | N/A                                  |
| Quantitative variables       | 11      | Explain how quantitative variables were handled in the analyses. If applicable, describe which groupings were chosen and why                                                                                                                                                                                           | 9-10                                 |
| Statistical methods          | 12      | (a) Describe all statistical methods, including those used to control for confounding<br>(b) Describe any methods used to examine subgroups and interactions<br>(c) Explain how missing data were addressed<br>(d) If applicable, explain how loss to follow-up was addressed<br>(e) Describe any sensitivity analyses | 9-10<br>9-10<br>9-10<br>9-10<br>9-10 |
| <b>Results</b>               |         |                                                                                                                                                                                                                                                                                                                        |                                      |
| Participants                 | 13*     | (a) Report numbers of individuals at each stage of study—eg numbers potentially eligible, examined for eligibility, confirmed eligible, included in the study, completing follow-up, and analysed<br>(b) Give reasons for non-participation at each stage<br>(c) Consider use of a flow diagram                        | 10-11<br>10-11<br>N/A                |
| Descriptive data             | 14*     | (a) Give characteristics of study participants (eg demographic, clinical, social) and information on exposures and potential confounders<br>(b) Indicate number of participants with missing data for each variable of interest<br>(c) Summarise follow-up time (eg, average and total amount)                         | 10-11<br>10-11<br>N/A                |
| Outcome data                 | 15*     | Report numbers of outcome events or summary measures over time                                                                                                                                                                                                                                                         | 11                                   |



|    |                          |    |                                                                                                                                                                                                              |       |
|----|--------------------------|----|--------------------------------------------------------------------------------------------------------------------------------------------------------------------------------------------------------------|-------|
| 1  | Main results             | 16 | (a) Give unadjusted estimates and, if applicable, confounder-adjusted estimates and their precision (eg, 95% confidence interval). Make clear which confounders were adjusted for and why they were included | 11-13 |
| 2  |                          |    | (b) Report category boundaries when continuous variables were categorized                                                                                                                                    | 11-13 |
| 3  |                          |    | (c) If relevant, consider translating estimates of relative risk into absolute risk for a meaningful time period                                                                                             | N/A   |
| 4  | Other analyses           | 17 | Report other analyses done—eg analyses of subgroups and interactions, and sensitivity analyses                                                                                                               | 11-13 |
| 5  | <b>Discussion</b>        |    |                                                                                                                                                                                                              |       |
| 6  | Key results              | 18 | Summarise key results with reference to study objectives                                                                                                                                                     | 13-14 |
| 7  | Limitations              | 19 | Discuss limitations of the study, taking into account sources of potential bias or imprecision. Discuss both direction and magnitude of any potential bias                                                   | 16    |
| 8  | Interpretation           | 20 | Give a cautious overall interpretation of results considering objectives, limitations, multiplicity of analyses, results from similar studies, and other relevant evidence                                   | 13-16 |
| 9  | Generalisability         | 21 | Discuss the generalisability (external validity) of the study results                                                                                                                                        | 13-16 |
| 10 | <b>Other information</b> |    |                                                                                                                                                                                                              |       |
| 11 | Funding                  | 22 | Give the source of funding and the role of the funders for the present study and, if applicable, for the original study on which the present article is based                                                | 17    |

\*Give information separately for exposed and unexposed groups.

**Note:** An Explanation and Elaboration article discusses each checklist item and gives methodological background and published examples of transparent reporting. The STROBE checklist is best used in conjunction with this article (freely available on the Web sites of PLoS Medicine at <http://www.plosmedicine.org/>, Annals of Internal Medicine at <http://www.annals.org/>, and Epidemiology at <http://www.epidem.com/>). Information on the STROBE Initiative is available at <http://www.strobe-statement.org>.
